# Supplementary material for: Novel integration of governmental data sources using machine learning to identify super-utilization among U.S. counties
Source: PubMed Central journal article supplement — Intell Based Med. Author manuscript; Available in PMC 2023 Jul 20. (PMC10358365; doi:10.1016/j.ibmed.2023.100093), 2023-01-21
Supplement: NIHMS1909855-supplement-1.pdf [file NIHMS1909855-supplement-1.pdf]

# Online Supplemental

|                                                                                                                                                                                                      |    |
|------------------------------------------------------------------------------------------------------------------------------------------------------------------------------------------------------|----|
| List of Abbreviations in Online Supplemental Tables.....                                                                                                                                             | 3  |
| Appendix A. Data Availability .....                                                                                                                                                                  | 4  |
| Appendix B. Model Specification for Feature Selection and Machine Learning Models .....                                                                                                              | 5  |
| Appendix C. Demographic main effects variables, expressed as 2017 county per capita or per capita %, eligible for feature selection for each outcome (N variables =149) .....                        | 6  |
| Appendix C.1. Demographic second order variables, expressed as 2017 county per capita or per capita %, eligible for feature selection, for each outcome .....                                        | 12 |
| Appendix D. Adult & child disease main effect variables, expressed as 2017 county per capita or per capita %, eligible for feature selection, for each outcome (N variables =146) .....              | 15 |
| Appendix D.1. Adult & Child Disease second order variables, expressed as 2017 county per capita or per capita %, eligible for feature selection, for each outcome .....                              | 22 |
| Appendix E. Community characteristics main effect variables, expressed as 2017 county per capita or per capita percent, eligible for feature selection, for each outcome (N variables =151) .....    | 25 |
| Appendix E.1. Community characteristic second order variables, expressed as 2017 county per capita or per capita %, eligible for feature selection, for each outcome .....                           | 32 |
| Appendix F. Consumer expenditure main effect variables, expressed as 2017 county per capita, eligible for feature selection, for each outcome (N variables =571).....                                | 35 |
| Appendix F.1. Consumer expenditure second order variables, expressed as 2017 county per capita or per capita %, eligible for feature selection, for each outcome .....                               | 57 |
| Figure A. Top 5% of Predicted Counties from Best Performing Machine Learning Prediction Model for Emergency Room Visits, Inpatient Days, and Hospital Expenditures among U.S. Counties in 2017. .... | 65 |
| Appendix G. Variable importance ('model outputs') for best performing machine learning prediction model for log ER visits per capita (Test set: MSE 0.003, R <sup>2</sup> 0.279) .....               | 66 |
| Appendix H. Relative influence ('model outputs') for best performing machine learning prediction model for log inpatient days per capita (Test set: MSE 0.009, R <sup>2</sup> 0.267).....            | 69 |
| Appendix I. Variable importance ('model outputs') for best performing machine learning prediction model for log hospital expenditures per capita (Test set MSE 0.003, R <sup>2</sup> 0.447).....     | 71 |
| Appendix J. Median and IQR values for per capita ER Visits, IP Days, and Hospital Expenditures in 2017, 2018, and 2019.....                                                                          | 74 |
| Appendix K. Histograms of ER visits, Inpatient Days, and Hospital Expenditures in 2017, 2018, and 2019 .....                                                                                         | 75 |
| Appendix L. Per capita trends in ER Visits (A), Inpatient Days (B) and Hospital Expenditures (C) overtime (2017-2019) for top 10 counties based on 2017 Utilization Values .....                     | 76 |

References .....77

## List of Abbreviations in Online Supplemental Tables

Pop=Population

ER=Emergency room

RV=recreational vehicle

Misc.=miscellaneous

BCBS=Blue Cross Blue Shield

RIHC=resource intensive healthcare

## Appendix A. Data & Code Availability

Data used to in this study came from various governmental agencies. Outcome data came from the American Hospital Association Survey and is published from the Health Resources Services Administration. This data is public domain and can be accessed here (<https://data.hrsa.gov/data/download>).

Candidate predictor data was extracted from Data Planet©, which is a web-based tool supported by SAGE Publishing. Data Planet© and SAGE publishing are reputable resources for researchers and are used worldwide. Due to Data Planet© terms of use, data cannot be publicly shared. However, researchers may have access to Data Planet© through licenses from their affiliated institutions, which are often available from their institutional library.

A repository with code and materials used to support this study is available on GitHub here: <https://github.com/iben-mickrick/Predicting-RIHC>

## Appendix B. Model Specification for Feature Selection and Machine Learning Models

| Random Forest Machine Learning Model & Feature Selection Information |                                        |
|----------------------------------------------------------------------|----------------------------------------|
| Number of drawn candidate variables in each split                    | 10.20 (ER), 10.20 (IP), 10.20 (HosExp) |
| Sample size of observations in full data                             | 2,475 (ER), 2,491 (IP & HosExp)        |
| Sample size* of observations in training data                        | 1983 (ER), 1955 (IP & HosExp)          |
| Sample size* of observations in testing data                         | 492 (ER), 496 (IP & HosExp)            |
| Whether observations were drawn with replacement                     | TRUE                                   |
| Node size                                                            | 5                                      |
| Number of trees                                                      | 500                                    |
| Splitting rule                                                       | Minimize SSE                           |
| R packaged utilized                                                  | Random Forest & s13                    |
| LASSO Feature Selection Information                                  |                                        |
| Alpha                                                                | 1                                      |
| Lambda                                                               | Lambda minimum                         |
| R package utilized                                                   | glmnet                                 |
| Regularized Machine Learning Model Information                       |                                        |
| Alpha                                                                | 1 (Tuned)                              |
| Lambda                                                               | Lambda minimum                         |
| R packaged utilized                                                  | Glmnet, S13                            |

ER= emergency room visits

IP= inpatient days

HosExp = hospital expenditures

\*Formal sample size calculations are challenging given the novelty of the proposed prediction models and lack of previous population-centric prediction models of resource intensive healthcare utilization among U.S. counties. Best effort attempts were made based on recommendations for prediction models with continuous endpoints and it was determined a sample size of approximately 400 would be sufficient given approximately 100 predictors. As such, the training and test set sample sizes are generally a sufficient size for this study.

Appendix C. Demographic main effects variables, expressed as 2017 county per capita or per capita %, eligible for feature selection for each outcome (N variables =149)

| <b>Outcome (per capita)</b>                                                        | <b>Log ER Visits (N=2475)</b> | <b>Log Inpatient Days (N=2491)</b> | <b>Log Hospital Expenditures (N=2491)</b> |
|------------------------------------------------------------------------------------|-------------------------------|------------------------------------|-------------------------------------------|
| census demographics 2017 population Median Age years                               | 41.18<br>(5.28)               | 41.18<br>(5.27)                    | 41.18<br>(5.27)                           |
| census demographics 2017 household Head Median Age years                           | 53.68<br>(3.42)               | 53.68<br>(3.41)                    | 53.68<br>(3.41)                           |
| census demographics 2017 family Head Median Age years                              | 51.66<br>(2.91)               | 51.66<br>(2.90)                    | 51.66<br>(2.90)                           |
| census demographics 2017 family Median Size persons                                | 3.11 (0.32)                   | 3.11 (0.32)                        | 3.11 (0.32)                               |
| census demographics 2017 household Income Median (\$)                              | 59263.81<br>(14660.63)        | 59237.72<br>(14663.59)             | 59237.72<br>(14663.59)                    |
| census demographics 2017 household Median persons                                  | 2.91 (0.31)                   | 2.91 (0.31)                        | 2.91 (0.31)                               |
| census demographics 2017 Non family Head Median Age years                          | 57.97<br>(5.17)               | 57.98<br>(5.15)                    | 57.98<br>(5.15)                           |
| census demographics 2017 Non family Median Size persons                            | 2.00 (0.04)                   | 2.00 (0.04)                        | 2.00 (0.04)                               |
| census demographics 2017 household Income Per Capita (\$)                          | 1.74 (2.89)                   | 1.73 (2.88)                        | 1.73 (2.88)                               |
| census demographics 2017 Personal Income (\$)                                      | 30533.30<br>(6743.83)         | 30519.57<br>(6743.58)              | 30519.57<br>(6743.58)                     |
| census demographics 2017 population 5+ English Speaking                            | 84.59<br>(11.07)              | 84.61<br>(11.06)                   | 84.61<br>(11.06)                          |
| census demographics 2017 population 5+ Spanish Speaking                            | 6.27 (9.39)                   | 6.25 (9.37)                        | 6.25 (9.37)                               |
| census demographics 2017 population 5+ Speaking Asian or Pacific Islander Language | 0.89 (1.68)                   | 0.89 (1.68)                        | 0.89 (1.68)                               |
| census demographics 2017 population 5+ Speaking other Language                     | 0.57 (2.56)                   | 0.56 (2.55)                        | 0.56 (2.55)                               |
| census demographics 2017 population Living in Group Quarters                       | 3.37 (3.81)                   | 3.38 (3.81)                        | 3.38 (3.81)                               |
| census demographics 2017 population Living in Institutional Group Quarters         | 2.16 (3.26)                   | 2.16 (3.26)                        | 2.16 (3.26)                               |
| census demographics 2017 population Living in Non-Institutional Group Quarters     | 1.22 (2.24)                   | 1.22 (2.23)                        | 1.22 (2.23)                               |
| census demographics 2017 household Head Under 25 Years                             | 4.49 (2.66)                   | 4.48 (2.65)                        | 4.48 (2.65)                               |
| census demographics 2017 household Head 25-34 Years                                | 13.28<br>(3.12)               | 13.27<br>(3.12)                    | 13.27<br>(3.12)                           |
| census demographics 2017 household Head 35 to 44 Years                             | 15.19<br>(2.64)               | 15.20<br>(2.64)                    | 15.20<br>(2.64)                           |
| census demographics 2017 household Head 45-54 Years                                | 19.57<br>(2.43)               | 19.58<br>(2.43)                    | 19.58<br>(2.43)                           |

|                                                                                           |                 |                 |                 |
|-------------------------------------------------------------------------------------------|-----------------|-----------------|-----------------|
| census demographics 2017 household Head 55-64 Years                                       | 20.42<br>(2.34) | 20.42<br>(2.34) | 20.42<br>(2.34) |
| census demographics 2017 household Head 65-74 Years                                       | 14.54<br>(2.92) | 14.54<br>(2.92) | 14.54<br>(2.92) |
| census demographics 2017 household Head 75-84 Years                                       | 8.77 (2.24)     | 8.77 (2.23)     | 8.77 (2.23)     |
| census demographics 2017 household Head 85+ Years                                         | 3.74 (1.36)     | 3.74 (1.36)     | 3.74 (1.36)     |
| census demographics 2017 household No Vehicles                                            | 6.89 (4.39)     | 6.90 (4.38)     | 6.90 (4.38)     |
| census demographics 2017 households 1 Vehicle                                             | 31.47<br>(5.39) | 31.47<br>(5.39) | 31.47<br>(5.39) |
| census demographics 2017 households 2 Vehicles                                            | 37.23<br>(4.49) | 37.22<br>(4.49) | 37.22<br>(4.49) |
| census demographics 2017 households 3 Vehicles                                            | 16.44<br>(3.79) | 16.44<br>(3.79) | 16.44<br>(3.79) |
| census demographics 2017 households 4+ Vehicles                                           | 7.98 (3.24)     | 7.97 (3.24)     | 7.97 (3.24)     |
| census demographics 2017 population Density Per Square Mile                               | 0.25 (1.10)     | 0.26 (1.11)     | 0.26 (1.11)     |
| census demographics 2017 population 3+ enrolled in public or private school               | 80.87<br>(6.52) | 80.88<br>(6.51) | 80.88<br>(6.51) |
| census demographics 2017 population 3+ enrolled in public school                          | 70.46<br>(7.48) | 70.45<br>(7.48) | 70.45<br>(7.48) |
| census demographics 2017 population 3+ enrolled in private school                         | 10.41<br>(5.71) | 10.42<br>(5.71) | 10.42<br>(5.71) |
| census demographics 2017 population 3+ enrolled in public preprimary school               | 3.68 (1.64)     | 3.68 (1.64)     | 3.68 (1.64)     |
| census demographics 2017 population 3+ enrolled in private preprimary school              | 1.60 (1.09)     | 1.60 (1.09)     | 1.60 (1.09)     |
| census demographics 2017 population 3+ enrolled in public kindergarten                    | 4.05 (1.28)     | 4.05 (1.28)     | 4.05 (1.28)     |
| census demographics 2017 population 3+ enrolled in private kindergarten                   | 0.41 (0.38)     | 0.41 (0.38)     | 0.41 (0.38)     |
| census demographics 2017 population 3+ enrolled in public grade 1-4                       | 15.46<br>(3.06) | 15.45<br>(3.06) | 15.45<br>(3.06) |
| census demographics 2017 population 3+ enrolled in private grade 1-4                      | 1.51 (1.12)     | 1.52 (1.12)     | 1.52 (1.12)     |
| census demographics 2017 population 3+ enrolled in public grade 5-8                       | 15.94<br>(3.38) | 15.94<br>(3.38) | 15.94<br>(3.38) |
| census demographics 2017 population 3+ enrolled in private grade 5-8                      | 1.49 (1.09)     | 1.49 (1.09)     | 1.49 (1.09)     |
| census demographics 2017 population 3+ enrolled in public grade 9-12                      | 16.38<br>(3.62) | 16.37<br>(3.61) | 16.37<br>(3.61) |
| census demographics 2017 population 3+ enrolled in private grade 9-12                     | 1.39 (1.03)     | 1.39 (1.03)     | 1.39 (1.03)     |
| census demographics 2017 population 3+ enrolled in public college                         | 13.02<br>(7.67) | 13.02<br>(7.65) | 13.02<br>(7.65) |
| census demographics 2017 population 3+ enrolled in private college                        | 3.10 (3.39)     | 3.10 (3.39)     | 3.10 (3.39)     |
| census demographics 2017 population 3+ enrolled in public graduate or professional school | 1.94 (1.64)     | 1.94 (1.63)     | 1.94 (1.63)     |

|                                                                                            |                   |                   |                   |
|--------------------------------------------------------------------------------------------|-------------------|-------------------|-------------------|
| census demographics 2017 population 3+ enrolled in private graduate or professional school | 0.91 (1.00)       | 0.91 (0.99)       | 0.91 (0.99)       |
| census demographics 2017 population 3+ not enrolled in school                              | 236.50<br>(48.01) | 236.51<br>(47.90) | 236.51<br>(47.90) |
| census demographics 2017 population 25+ with less than high school diploma                 | 14.47<br>(6.45)   | 14.50<br>(6.45)   | 14.50<br>(6.45)   |
| census demographics 2017 population 25+ with high school diploma                           | 33.35<br>(6.97)   | 33.36<br>(6.96)   | 33.36<br>(6.96)   |
| census demographics 2017 population 25+ with some college                                  | 22.57<br>(4.05)   | 22.56<br>(4.05)   | 22.56<br>(4.05)   |
| census demographics 2017 population in Poverty                                             | 16.77<br>(6.25)   | 16.79<br>(6.27)   | 16.79<br>(6.27)   |
| census demographics 2017 population 25+ with associates degree                             | 8.40 (2.51)       | 8.39 (2.51)       | 8.39 (2.51)       |
| census demographics 2017 population 25+ with bachelor's degree                             | 13.82<br>(5.49)   | 13.81<br>(5.49)   | 13.81<br>(5.49)   |
| census demographics 2017 population 25+ with master's degree                               | 5.36 (2.79)       | 5.36 (2.78)       | 5.36 (2.78)       |
| census demographics 2017 population 25+ with professional degree                           | 1.21 (0.84)       | 1.21 (0.83)       | 1.21 (0.83)       |
| census demographics 2017 population 25+ with doctorate                                     | 0.82 (0.95)       | 0.82 (0.95)       | 0.82 (0.95)       |
| census demographics 2017 households income less than 15,000                                | 11.99<br>(4.31)   | 12.00<br>(4.31)   | 12.00<br>(4.31)   |
| census demographics 2017 household Income 15,000-24,999                                    | 9.44 (2.46)       | 9.44 (2.46)       | 9.44 (2.46)       |
| census demographics 2017 household income 25,000-34,999                                    | 9.77 (1.99)       | 9.78 (2.00)       | 9.78 (2.00)       |
| census demographics 2017 household income 35,000-49,999                                    | 13.09<br>(1.94)   | 13.09<br>(1.94)   | 13.09<br>(1.94)   |
| census demographics 2017 household income 50,000-74,999                                    | 17.33<br>(1.95)   | 17.32<br>(1.95)   | 17.32<br>(1.95)   |
| census demographics 2017 household income 75,000-99,999                                    | 13.37<br>(1.79)   | 13.37<br>(1.79)   | 13.37<br>(1.79)   |
| census demographics 2017 household income 100,000-124,999                                  | 9.34 (1.91)       | 9.34 (1.91)       | 9.34 (1.91)       |
| census demographics 2017 household income 125,000-149,999                                  | 5.89 (1.85)       | 5.89 (1.85)       | 5.89 (1.85)       |
| census demographics 2017 household income 150,000-199,999                                  | 4.86 (2.34)       | 4.86 (2.34)       | 4.86 (2.34)       |
| census demographics 2017 household income 200,000+                                         | 4.92 (3.74)       | 4.91 (3.73)       | 4.91 (3.73)       |
| census demographics 2017 households 1 person                                               | 28.18<br>(4.64)   | 28.17<br>(4.64)   | 28.17<br>(4.64)   |
| census demographics 2017 households 2 people                                               | 34.86<br>(4.01)   | 34.85<br>(4.01)   | 34.85<br>(4.01)   |
| census demographics 2017 households 3 people                                               | 15.03<br>(2.47)   | 15.05<br>(2.47)   | 15.05<br>(2.47)   |
| census demographics 2017 households 4 people                                               | 11.93<br>(2.35)   | 11.93<br>(2.35)   | 11.93<br>(2.35)   |
| census demographics 2017 households 5 people                                               | 5.99 (1.65)       | 5.99 (1.64)       | 5.99 (1.64)       |



|                                                                                                  |                  |                  |                  |
|--------------------------------------------------------------------------------------------------|------------------|------------------|------------------|
| census demographics 2017 households 6 people                                                     | 2.42 (1.02)      | 2.42 (1.02)      | 2.42 (1.02)      |
| census demographics 2017 households 7+ people                                                    | 1.58 (1.11)      | 1.59 (1.11)      | 1.59 (1.11)      |
| census demographics 2017 family married with children less than 18                               | 9.37 (1.47)      | 9.37 (1.47)      | 9.37 (1.47)      |
| census demographics 2017 household average size persons                                          | 2.39 (0.50)      | 2.39 (0.50)      | 2.39 (0.50)      |
| census demographics 2017 Male household head                                                     | 62.11<br>(5.51)  | 62.08<br>(5.53)  | 62.08<br>(5.53)  |
| census demographics 2017 Female household head                                                   | 37.89<br>(5.51)  | 37.92<br>(5.53)  | 37.92<br>(5.53)  |
| census demographics 2017 Male Head of family                                                     | 45.42<br>(6.33)  | 45.41<br>(6.33)  | 45.41<br>(6.33)  |
| census demographics 2017 Female head of family                                                   | 20.56<br>(5.05)  | 20.59<br>(5.07)  | 20.59<br>(5.07)  |
| census demographics 2017 family married                                                          | 24.09<br>(3.40)  | 24.07<br>(3.41)  | 24.07<br>(3.41)  |
| census demographics 2017 other male head of family No Wife Present                               | 2.49 (0.52)      | 2.49 (0.51)      | 2.49 (0.51)      |
| census demographics 2017 other female head of family No Husband                                  | 5.80 (1.94)      | 5.82 (1.95)      | 5.82 (1.95)      |
| census demographics 2017 family married no children less than 18                                 | 14.72<br>(3.19)  | 14.70<br>(3.19)  | 14.70<br>(3.19)  |
| census demographics 2017 other male head of family no wife present with children less than 18    | 1.52 (0.37)      | 1.52 (0.37)      | 1.52 (0.37)      |
| census demographics 2017 other Male head of family no wife present no children less than 18      | 0.97 (0.25)      | 0.97 (0.25)      | 0.97 (0.25)      |
| census demographics 2017 other Female head family no husband present with children less than 18  | 3.82 (1.33)      | 3.83 (1.33)      | 3.83 (1.33)      |
| census demographics 2017 other Female head of family no husband present no children less than 18 | 1.98 (0.74)      | 1.99 (0.74)      | 1.99 (0.74)      |
| census demographics 2017 Non family male household head                                          | 16.69<br>(3.18)  | 16.68<br>(3.18)  | 16.68<br>(3.18)  |
| census demographics 2017 Non family female head of household                                     | 17.33<br>(3.14)  | 17.33<br>(3.14)  | 17.33<br>(3.14)  |
| census demographics 2017 Non family male household head with people less than 18                 | 0.31 (0.13)      | 0.31 (0.13)      | 0.31 (0.13)      |
| census demographics 2017 Non family male household head without people less than 18              | 16.37<br>(3.23)  | 16.35<br>(3.23)  | 16.35<br>(3.23)  |
| census demographics 2017 Non family female household head with people less than 18               | 0.08 (0.04)      | 0.08 (0.04)      | 0.08 (0.04)      |
| census demographics 2017 Non family female household head without people less than 18            | 17.26<br>(3.16)  | 17.27<br>(3.16)  | 17.27<br>(3.16)  |
| census demographics 2017 population urban persons                                                | 48.01<br>(29.65) | 47.99<br>(29.70) | 47.99<br>(29.70) |
| census demographics 2017 population rural persons                                                | 51.99<br>(29.65) | 52.01<br>(29.70) | 52.01<br>(29.70) |
| census demographics 2017 population male persons                                                 | 49.95<br>(1.92)  | 49.95<br>(1.92)  | 49.95<br>(1.92)  |
| census demographics 2017 population female persons                                               | 50.05<br>(1.92)  | 50.05<br>(1.92)  | 50.05<br>(1.92)  |

|                                                                               |                             |                             |                             |
|-------------------------------------------------------------------------------|-----------------------------|-----------------------------|-----------------------------|
| census demographics 2017 White population alone persons                       | 88443.85<br>(214149.46<br>) | 88022.72<br>(213530.48<br>) | 88022.72<br>(213530.48<br>) |
| census demographics 2017 other race population alone persons                  | 3.50 (4.77)                 | 3.49 (4.76)                 | 3.49 (4.76)                 |
| census demographics 2017 White households                                     | 84.35<br>(15.68)            | 84.25<br>(15.75)            | 84.25<br>(15.75)            |
| census demographics 2017 Black households                                     | 8.40<br>(13.75)             | 8.52<br>(13.88)             | 8.52<br>(13.88)             |
| census demographics 2017 Asian households                                     | 1.28 (2.79)                 | 1.28 (2.79)                 | 1.28 (2.79)                 |
| census demographics 2017 American Indian and Alaska Native Head of households | 0.01 (0.08)                 | 0.01 (0.08)                 | 0.01 (0.08)                 |
| census demographics 2017 other Race Head of households                        | 2.50 (3.78)                 | 2.49 (3.77)                 | 2.49 (3.77)                 |
| census demographics 2017 family with 1 person                                 | 0.00 (0.00)                 | 0.00 (0.00)                 | 0.00 (0.00)                 |
| census demographics 2017 Two or more Races Head of households                 | 0.01 (0.01)                 | 0.01 (0.01)                 | 0.01 (0.01)                 |
| census demographics 2017 families 2 persons families                          | 14.98<br>(3.10)             | 14.97<br>(3.10)             | 14.97<br>(3.10)             |
| census demographics 2017 families 3 persons families                          | 7.03 (1.04)                 | 7.04 (1.04)                 | 7.04 (1.04)                 |
| census demographics 2017 families 4 persons families                          | 5.66 (0.78)                 | 5.66 (0.78)                 | 5.66 (0.78)                 |
| census demographics 2017 families 5 persons families                          | 2.84 (0.49)                 | 2.84 (0.49)                 | 2.84 (0.49)                 |
| census demographics 2017 families 6 persons families                          | 1.14 (0.32)                 | 1.14 (0.32)                 | 1.14 (0.32)                 |
| census demographics 2017 families 7+ persons families                         | 0.73 (0.38)                 | 0.73 (0.38)                 | 0.73 (0.38)                 |
| census demographics 2017 Non family 1 person households                       | 28.18<br>(4.64)             | 28.17<br>(4.64)             | 28.17<br>(4.64)             |
| census demographics 2017 Non family 2 people households                       | 4.75 (1.74)                 | 4.74 (1.73)                 | 4.74 (1.73)                 |
| census demographics 2017 Non family 3 people households                       | 0.67 (0.57)                 | 0.66 (0.57)                 | 0.66 (0.57)                 |
| census demographics 2017 Non family 4 people households                       | 0.28 (0.39)                 | 0.28 (0.39)                 | 0.28 (0.39)                 |
| census demographics 2017 Non family 5 people households                       | 0.08 (0.10)                 | 0.08 (0.10)                 | 0.08 (0.10)                 |
| census demographics 2017 Non family 6 people households                       | 0.03 (0.15)                 | 0.03 (0.15)                 | 0.03 (0.15)                 |
| census demographics 2017 Non family 7+ people households                      | 0.02 (0.03)                 | 0.02 (0.03)                 | 0.02 (0.03)                 |
| census demographics 2017 families under 25 years families                     | 1.05 (0.42)                 | 1.05 (0.42)                 | 1.05 (0.42)                 |
| census demographics 2017 families aged 25-34 years families                   | 4.68 (0.94)                 | 4.68 (0.94)                 | 4.68 (0.94)                 |
| census demographics 2017 families aged 35-44 years families                   | 5.89 (0.80)                 | 5.89 (0.80)                 | 5.89 (0.80)                 |
| census demographics 2017 families aged 45-54 years families                   | 6.80 (0.89)                 | 6.80 (0.89)                 | 6.80 (0.89)                 |
| census demographics 2017 families aged 55-64 years families                   | 6.62 (1.14)                 | 6.62 (1.13)                 | 6.62 (1.13)                 |

|                                                                              |               |               |               |
|------------------------------------------------------------------------------|---------------|---------------|---------------|
| census demographics 2017 White Non-Hispanic households                       | 0.49 (0.82)   | 0.49 (0.82)   | 0.49 (0.82)   |
| census demographics 2017 families aged 65-74 years families                  | 4.49 (1.19)   | 4.49 (1.18)   | 4.49 (1.18)   |
| census demographics 2017 families aged 75+ years families                    | 2.84 (0.90)   | 2.84 (0.90)   | 2.84 (0.90)   |
| census demographics 2017 Non families aged under 25 years households         | 2.33 (2.33)   | 2.33 (2.32)   | 2.33 (2.32)   |
| census demographics 2017 Non families aged 25-34 years households            | 3.67 (1.86)   | 3.67 (1.85)   | 3.67 (1.85)   |
| census demographics 2017 Nonfamilies aged 35-44 years households             | 3.06 (0.85)   | 3.06 (0.84)   | 3.06 (0.84)   |
| census demographics 2017 Non families aged 45-54 years households            | 5.65 (1.09)   | 5.65 (1.09)   | 5.65 (1.09)   |
| census demographics 2017 Non families aged 55-64 years households            | 7.01 (1.50)   | 7.01 (1.50)   | 7.01 (1.50)   |
| census demographics 2017 Nonfamilies aged 65-74 years households             | 5.48 (1.36)   | 5.48 (1.36)   | 5.48 (1.36)   |
| census demographics 2017 Non families aged 75+ years households              | 6.80 (2.14)   | 6.80 (2.14)   | 6.80 (2.14)   |
| census demographics 2017 population native citizens                          | 94.86 (5.81)  | 94.87 (5.81)  | 94.87 (5.81)  |
| census demographics 2017 population foreign born or naturalized citizens     | 1.98 (2.56)   | 1.98 (2.56)   | 1.98 (2.56)   |
| census demographics 2017 population foreign born non-citizens                | 3.16 (3.70)   | 3.15 (3.70)   | 3.15 (3.70)   |
| census demographics 2017 White population alone persons                      | 80.97 (16.75) | 80.86 (16.82) | 80.86 (16.82) |
| census demographics 2017 Black population alone persons                      | 9.20 (14.34)  | 9.33 (14.49)  | 9.33 (14.49)  |
| census demographics 2017 Asian population alone persons                      | 1.64 (3.12)   | 1.64 (3.13)   | 1.64 (3.13)   |
| census demographics 2017 population 15+ married and together                 | 48.52 (7.08)  | 48.49 (7.09)  | 48.49 (7.09)  |
| census demographics 2017 population 15+ married and separated                | 2.06 (1.06)   | 2.07 (1.06)   | 2.07 (1.06)   |
| census demographics 2017 population 15+ married and absent                   | 2.32 (1.18)   | 2.32 (1.18)   | 2.32 (1.18)   |
| census demographics 2017 population 15+ widowed                              | 7.25 (1.87)   | 7.26 (1.87)   | 7.26 (1.87)   |
| census demographics 2017 population 15+ divorced                             | 12.14 (2.49)  | 12.14 (2.48)  | 12.14 (2.48)  |
| census demographics 2017 population 5+ speaking other IndoEuropean languages | 1.72 (2.32)   | 1.72 (2.32)   | 1.72 (2.32)   |
| census demographics 2017 population Veterans                                 | 10.25 (2.81)  | 10.25 (2.80)  | 10.25 (2.80)  |

Appendix C.1. Demographic second order variables, expressed as 2017 county per capita or per capita %, eligible for feature selection, for each outcome

| <b>Log ER Visits (2,475)</b>                                                                                                                                              |                    |
|---------------------------------------------------------------------------------------------------------------------------------------------------------------------------|--------------------|
| <i>Variable Name</i>                                                                                                                                                      | <i>Mean (SD)</i>   |
| census demographics 2017 non Families Median Age years * census demographics 2017 other Families female head no husband present                                           | 335.14<br>(113.21) |
| census demographics 2017 population non Institutional living in group quarters* census demographics 2017 other Families female head no husband present                    | 7.36<br>(14.87)    |
| census demographics 2017 household head 85+ years* census demographics 2017 other Families female head no husband present                                                 | 21.01<br>(8.42)    |
| census demographics 2017 households with no vehicles* census demographics 2017 other Families female head no husband present                                              | 44.12<br>(44.52)   |
| census demographics 2017 population 3+ enrolled in public graduate or professional schools* census demographics 2017 other Families female head no husband present        | 11.55<br>(11.52)   |
| census demographics 2017 population 25+ with masters degree* census demographics 2017 other Families female head no husband present                                       | 31.00<br>(18.94)   |
| census demographics 2017 population 25+ with professional degree* census demographics 2017 other Families female head no husband present                                  | 7.04<br>(5.88)     |
| census demographics 2017 household income 100,000-124,999* census demographics 2017 other Families female head no husband present                                         | 52.56<br>(15.45)   |
| census demographics 2017 other Families female head no husband present with children less than 18* census demographics 2017 other Families female head no husband present | 24.67<br>(18.59)   |
| census demographics 2017 population Urban* census demographics 2017 other Families female head no husband present                                                         | 292.01<br>(220.86) |
| census demographics 2017 Asian Head household* census demographics 2017 other Families female head no husband present                                                     | 7.47<br>(15.21)    |
| census demographics 2017 Families 3 persons families * census demographics 2017 other Families female head no husband present                                             | 41.62<br>(17.48)   |
| census demographics 2017 families under 25 years families* census demographics 2017 other Families female head no husband present                                         | 6.37<br>(3.92)     |
| census demographics 2017 White Non-Hispanic households* census demographics 2017 other Families female head no husband present                                            | 2.29<br>(2.99)     |
| census demographics 2017 Asian population alone* census demographics 2017 other Families female head no husband present                                                   | 9.48<br>(17.14)    |
| <b>Log IP Days (2,491)</b>                                                                                                                                                |                    |
| <i>Variable Name</i>                                                                                                                                                      | <i>Mean (SD)</i>   |
| census demographics 2017 population living in group quarters* census demographics 2017 household Income Per Capita                                                        | 5.70<br>(15.16)    |
| census demographics 2017 population institutional living in group quarters* census demographics 2017 household Income Per Capita                                          | 4.01<br>(11.03)    |
| census demographics 2017 population living in non-institutional group quarters* census demographics 2017 household Income Per Capita                                      | 1.68<br>(9.60)     |
| census demographics 2017 households without vehicle* census demographics 2017 household Income Per Capita                                                                 | 9.94<br>(16.93)    |

|                                                                                                                                               |                      |
|-----------------------------------------------------------------------------------------------------------------------------------------------|----------------------|
| census demographics 2017 households with 1 vehicle* census demographics 2017 household Income Per Capita                                      | 50.50<br>(79.81)     |
| census demographics 2017 population 3+ in public grades 5-8* census demographics 2017 household Income Per Capita                             | 30.73<br>(58.39)     |
| census demographics 2017 population 3+ enrolled in public undergraduate schools* census demographics 2017 household Income Per Capita         | 16.78<br>(24.31)     |
| census demographics 2017 population 3+ enrolled in public graduate schools* census demographics 2017 household Income Per Capita              | 2.80<br>(6.15)       |
| census demographics 2017 population 25+ with professional degree* census demographics 2017 household Income Per Capita                        | 1.55<br>(2.78)       |
| census demographics 2017 households 1 person * census demographics 2017 household Income Per Capita                                           | 52.96<br>(95.18)     |
| census demographics 2017 Female head of households* census demographics 2017 household Income Per Capita                                      | 59.42<br>(88.52)     |
| census demographics 2017 Male head of Families* census demographics 2017 household Income Per Capita                                          | 83.22<br>(148.43)    |
| census demographics 2017 Female head of non- Families* census demographics 2017 household Income Per Capita                                   | 30.16<br>(51.83)     |
| census demographics 2017 Female head non- Families with no people less than 18* census demographics 2017 household Income Per Capita          | 30.21<br>(52.48)     |
| census demographics 2017 Non families aged under 25 years households* census demographics 2017 household Income Per Capita                    | 3.46<br>(6.15)       |
| <b>Log Hospital Expenditures (2,491)</b>                                                                                                      |                      |
| <i>Variable Name</i>                                                                                                                          | <i>Mean<br/>(SD)</i> |
| census demographics 2017 population Non Institutional living in group quarters* census demographics 2017 Non Families head less than 25 years | 5.92<br>(21.47)      |
| census demographics 2017 household income per capita * census demographics 2017 Non Families head less than 25 years                          | 3.46<br>(6.15)       |
| census demographics 2017 household head 85+years* census demographics 2017 Non Families head less than 25 years                               | 8.44<br>(7.59)       |
| census demographics 2017 households with 5 people* census demographics 2017 Non Families head less than 25 years                              | 13.29<br>(11.98)     |
| census demographics 2017 Asian households* census demographics 2017 Non Families head less than 25 years                                      | 3.92<br>(11.30)      |
| census demographics 2017 population density per square mile* census demographics 2017 Non Families head less than 25 years                    | 0.83<br>(8.44)       |
| census demographics 2017 population 25+years with professional degree* census demographics 2017 Non Families head less than 25 years          | 3.35<br>(6.05)       |
| census demographics 2017 Non family 4 people households* census demographics 2017 Non Families head less than 25 years                        | 1.39<br>(6.55)       |
| census demographics 2017 households with 1 person* census demographics 2017 Non Families head less than 25 years                              | 67.37<br>(71.41)     |
| census demographics 2017 Non family 1 person households* census demographics 2017 Non Families head less than 25 years                        | 67.37<br>(71.41)     |
| census demographics 2017 White Non-Hispanic households* census demographics 2017 Non Families head less than 25 years                         | 0.98<br>(1.75)       |

|                                                                                                                |                 |
|----------------------------------------------------------------------------------------------------------------|-----------------|
| census demographics 2017 Asian population alone* census demographics 2017 Non Families head less than 25 years | 4.85<br>(12.61) |
|----------------------------------------------------------------------------------------------------------------|-----------------|

An \* is placed between 2 features to indicate interaction

Appendix D. Adult & child disease main effect variables, expressed as 2017 county per capita or per capita %, eligible for feature selection, for each outcome (N variables =146)

| <b>Outcomes (Per Capita)</b>                                                                          | <b>ER Visits (N=2475)</b> | <b>Inpatient Days (N=2491)</b> | <b>Hospital Expenditures (N=2491)</b> |
|-------------------------------------------------------------------------------------------------------|---------------------------|--------------------------------|---------------------------------------|
| <i>Variable Name</i>                                                                                  | <i>Mean (SD)</i>          | <i>Mean (SD)</i>               | <i>Mean (SD)</i>                      |
| health adults 2017 Aerobic exercise only inactive count of households persons                         | 30.49 (1.22)              | 30.49 (1.23)                   | 30.49 (1.23)                          |
| health adults 2017 Aerobic exercise only insufficiently active count of households persons            | 19.71 (0.25)              | 19.71 (0.25)                   | 19.71 (0.25)                          |
| health adults 2017 Aerobic exercise only sufficiently active count of households persons              | 48.21 (1.28)              | 48.20 (1.28)                   | 48.20 (1.28)                          |
| health adults 2017 Aerobic and strength exercise requirements neither met count of households persons | 46.79 (1.13)              | 46.80 (1.13)                   | 46.80 (1.13)                          |
| health adults 2017 Aerobic and strength exercise met muscle only count of households persons          | 3.45 (0.07)               | 3.45 (0.07)                    | 3.45 (0.07)                           |
| health adults 2017 Aerobic and strength exercise met aerobic only count of households persons         | 27.60 (0.78)              | 27.60 (0.79)                   | 27.60 (0.79)                          |
| health adults 2017 Aerobic and strength met both count of households persons                          | 20.51 (0.82)              | 20.51 (0.82)                   | 20.51 (0.82)                          |
| health adults 2017 Serious psychological distress count of households persons                         | 3.50 (0.29)               | 3.50 (0.29)                    | 3.50 (0.29)                           |
| health adults 2017 Hospital or ER count of households persons                                         | 0.89 (0.11)               | 0.89 (0.12)                    | 0.89 (0.12)                           |
| health adults 2017 Hospital outpatient department count of households persons                         | 1.00 (0.11)               | 1.00 (0.11)                    | 1.00 (0.11)                           |
| health adults 2017 Has unmet dental needs due to cost count of households persons                     | 10.98 (0.84)              | 10.99 (0.84)                   | 10.99 (0.84)                          |
| health adults 2017 Does not have unmet dental need due to cost count of households persons            | 88.01 (1.07)              | 88.01 (1.07)                   | 88.01 (1.07)                          |
| health adults 2017 All types heart disease count of households persons                                | 12.43 (0.97)              | 12.43 (0.96)                   | 12.43 (0.96)                          |
| health adults 2017 Chronic bronchitis count of households persons                                     | 3.91 (0.14)               | 3.91 (0.14)                    | 3.91 (0.14)                           |
| health adults 2017 Dental visit 6 months or less count of households persons                          | 46.45 (2.07)              | 46.44 (2.08)                   | 46.44 (2.08)                          |
| health adults 2017 Dental visit 6 month to less than 1 year count of households persons               | 15.94 (0.33)              | 15.95 (0.33)                   | 15.95 (0.33)                          |
| health adults 2017 Dental visit within 1 year and less than 2 years count of households persons       | 12.16 (0.32)              | 12.16 (0.32)                   | 12.16 (0.32)                          |
| health adults 2017 Dental visits between 2 years and less than 5 years count of households persons    | 10.97 (0.51)              | 10.97 (0.51)                   | 10.97 (0.51)                          |
| health adults 2017 Dental visit within 5 years count of households persons                            | 12.08 (0.99)              | 12.08 (0.99)                   | 12.08 (0.99)                          |

|                                                                                     |                 |                 |              |
|-------------------------------------------------------------------------------------|-----------------|-----------------|--------------|
| health adults 2017 HIV ever tested count of households persons                      | 35.72<br>(1.79) | 35.73<br>(1.80) | 35.73 (1.80) |
| health adults 2017 HIV never tested count of households persons                     | 58.95<br>(1.95) | 58.94<br>(1.95) | 58.94 (1.95) |
| health adults 2017 Any cancer count of households persons                           | 9.49<br>(1.05)  | 9.49<br>(1.05)  | 9.49 (1.05)  |
| health adults 2017 breast cancer count of households persons                        | 1.72<br>(0.14)  | 1.72<br>(0.14)  | 1.72 (0.14)  |
| health adults 2017 Cervical cancer count of households persons                      | 0.44<br>(0.02)  | 0.44<br>(0.02)  | 0.44 (0.02)  |
| health adults 2017 Prostate Cancer count of households persons                      | 1.17<br>(0.14)  | 1.17<br>(0.14)  | 1.17 (0.14)  |
| health adults 2017 Diabetes count of households persons                             | 10.09<br>(0.81) | 10.09<br>(0.80) | 10.09 (0.80) |
| health adults 2017 Ulcers count of households persons                               | 6.29<br>(0.26)  | 6.29<br>(0.26)  | 6.29 (0.26)  |
| health adults 2017 kidney disease count of households persons                       | 2.11<br>(0.19)  | 2.11<br>(0.19)  | 2.11 (0.19)  |
| health adults 2017 Liver disease count of households persons                        | 1.66<br>(0.07)  | 1.66<br>(0.07)  | 1.66 (0.07)  |
| health adults 2017 Arthritis diagnosis count of households persons                  | 24.12<br>(1.72) | 24.12<br>(1.72) | 24.12 (1.72) |
| health adults 2017 Coronary heart disease count of households persons               | 6.60<br>(0.67)  | 6.60<br>(0.67)  | 6.60 (0.67)  |
| health adults 2017 Chronic joint symptoms count of households persons               | 30.93<br>(1.31) | 30.92<br>(1.30) | 30.92 (1.30) |
| health adults 2017 Migraines or severe headaches count of households persons        | 14.93<br>(0.25) | 14.93<br>(0.25) | 14.93 (0.25) |
| health adults 2017 Pain in neck count of households persons                         | 16.30<br>(0.25) | 16.30<br>(0.25) | 16.30 (0.25) |
| health adults 2017 Pain in lo wither back count of households persons               | 30.28<br>(0.58) | 30.28<br>(0.58) | 30.28 (0.58) |
| health adults 2017 Pain in face or ja with count of households persons              | 4.20<br>(0.06)  | 4.19<br>(0.06)  | 4.19 (0.06)  |
| health adults 2017 Hearing trouble count of households persons                      | 16.18<br>(1.15) | 16.18<br>(1.15) | 16.18 (1.15) |
| health adults 2017 Vision trouble count of households persons                       | 9.64<br>(0.35)  | 9.64<br>(0.35)  | 9.64 (0.35)  |
| health adults 2017 Absence of all natural teeth count of households persons         | 7.68<br>(0.69)  | 7.68<br>(0.69)  | 7.68 (0.69)  |
| health adults 2017 sadness all or most of the time count of households persons      | 2.89<br>(0.23)  | 2.89<br>(0.23)  | 2.89 (0.23)  |
| health adults 2017 Sadness some of the time count of households persons             | 8.30<br>(0.39)  | 8.30<br>(0.39)  | 8.30 (0.39)  |
| health adults 2017 Hypertension count of households persons                         | 28.41<br>(1.98) | 28.41<br>(1.97) | 28.41 (1.97) |
| health adults 2017 Hopelessness all or most of the time count of households persons | 2.05<br>(0.16)  | 2.05<br>(0.16)  | 2.05 (0.16)  |
| health adults 2017 Hopelessness some of the time count of households persons        | 4.90<br>(0.28)  | 4.90<br>(0.28)  | 4.90 (0.28)  |



|                                                                                           |                 |                 |              |
|-------------------------------------------------------------------------------------------|-----------------|-----------------|--------------|
| health adults 2017 worthlessness all or most of the time count of households persons      | 1.76<br>(0.16)  | 1.76<br>(0.16)  | 1.76 (0.16)  |
| health adults 2017 worthlessness some of the time count of households persons             | 3.75<br>(0.22)  | 3.76<br>(0.22)  | 3.76 (0.22)  |
| health adults 2017 Everything effort all or most of the time count of households persons  | 6.51<br>(0.39)  | 6.51<br>(0.39)  | 6.51 (0.39)  |
| health adults 2017 Everything effort some of the time count of households persons         | 9.92<br>(0.22)  | 9.92<br>(0.22)  | 9.92 (0.22)  |
| health adults 2017 Nervousness all or most of the time count of households persons        | 5.01<br>(0.20)  | 5.01<br>(0.20)  | 5.01 (0.20)  |
| health adults 2017 Nervousness some of the time count of households persons               | 12.73<br>(0.14) | 12.73<br>(0.14) | 12.73 (0.14) |
| health adults 2017 Restlessness all of most of the time count of households persons       | 6.43<br>(0.27)  | 6.43<br>(0.28)  | 6.43 (0.28)  |
| health adults 2017 Restlessness some of the time count of households persons              | 12.64<br>(0.20) | 12.64<br>(0.20) | 12.64 (0.20) |
| health adults 2017 Stroke count of households persons                                     | 2.83<br>(0.25)  | 2.83<br>(0.25)  | 2.83 (0.25)  |
| health adults 2017 Cannot so any physical activity count of households persons            | 16.99<br>(1.12) | 16.99<br>(1.12) | 16.99 (1.12) |
| health adults 2017 Cannot walk quarter mile count of households persons                   | 7.76<br>(0.61)  | 7.76<br>(0.61)  | 7.76 (0.61)  |
| health adults 2017 Cannot Climb 10steps without rest count of households persons          | 5.66<br>(0.47)  | 5.66<br>(0.47)  | 5.66 (0.47)  |
| health adults 2017 Cannot stand 2hrs count of households persons                          | 10.60<br>(0.78) | 10.60<br>(0.78) | 10.60 (0.78) |
| health adults 2017 Cannot sit 2hrs count of households persons                            | 3.54<br>(0.25)  | 3.54<br>(0.25)  | 3.54 (0.25)  |
| health adults 2017 Cannot stoop,bend or kneel count of households persons                 | 9.91<br>(0.71)  | 9.91<br>(0.71)  | 9.91 (0.71)  |
| health adults 2017 Cannot reach overhead count of households persons                      | 2.65<br>(0.20)  | 2.65<br>(0.20)  | 2.65 (0.20)  |
| health adults 2017 Cannot do thing with hand or small objects count of households persons | 2.01<br>(0.16)  | 2.02<br>(0.16)  | 2.02 (0.16)  |
| health adults 2017 Cannot carry 10lbs count of households persons                         | 4.66<br>(0.36)  | 4.66<br>(0.36)  | 4.66 (0.36)  |
| health adults 2017 Cannot push or pull large objects count of households persons          | 6.74<br>(0.48)  | 6.74<br>(0.48)  | 6.74 (0.48)  |
| health adults 2017 Emphysema count of households persons                                  | 1.57<br>(0.15)  | 1.57<br>(0.15)  | 1.57 (0.15)  |
| health adults 2017 Health Status excellent or very good count of households persons       | 59.71<br>(1.72) | 59.71<br>(1.72) | 59.71 (1.72) |
| health adults 2017 Health status good count of households persons                         | 27.09<br>(0.67) | 27.10<br>(0.67) | 27.10 (0.67) |
| health adults 2017 Health status fair or poor count of households persons                 | 13.19<br>(0.89) | 13.20<br>(0.90) | 13.20 (0.90) |
| health adults 2017 Ever had asthma count of households persons                            | 12.70<br>(0.24) | 12.70<br>(0.24) | 12.70 (0.24) |
| health adults 2017 All current smokers count of households persons                        | 15.38<br>(0.69) | 15.39<br>(0.69) | 15.39 (0.69) |

|                                                                                                  |                 |                 |              |
|--------------------------------------------------------------------------------------------------|-----------------|-----------------|--------------|
| health adults 2017 Every day smokers count of households persons                                 | 11.74<br>(0.62) | 11.74<br>(0.62) | 11.74 (0.62) |
| health adults 2017 Some day smokers count of households persons                                  | 3.64<br>(0.09)  | 3.64<br>(0.09)  | 3.64 (0.09)  |
| health adults 2017 Former smokers count of households persons                                    | 22.62<br>(1.09) | 22.62<br>(1.09) | 22.62 (1.09) |
| health adults 2017 Non smokers count of households persons                                       | 62.15<br>(1.05) | 62.15<br>(1.04) | 62.15 (1.04) |
| health adults 2017 Alcohol lifetime abstainer count of households persons                        | 19.87<br>(0.86) | 19.87<br>(0.87) | 19.87 (0.87) |
| health adults 2017 Alcohol former user infrequent count of households persons                    | 8.72<br>(0.40)  | 8.72<br>(0.40)  | 8.72 (0.40)  |
| health adults 2017 Alcohol former regular user count of households persons                       | 5.74<br>(0.28)  | 5.74<br>(0.28)  | 5.74 (0.28)  |
| health adults 2017 Still have asthma count of households persons                                 | 7.67<br>(0.16)  | 7.67<br>(0.16)  | 7.67 (0.16)  |
| health adults 2017 Alcohol current infrequent user count of households persons                   | 13.08<br>(0.12) | 13.08<br>(0.12) | 13.08 (0.12) |
| health adults 2017 Alcohol current regular user count of households persons                      | 51.11<br>(1.35) | 51.10<br>(1.36) | 51.10 (1.36) |
| health adults 2017 Underweight BMI count of households persons                                   | 1.80<br>(0.04)  | 1.80<br>(0.04)  | 1.80 (0.04)  |
| health adults 2017 Hay fever count of households persons                                         | 8.34<br>(0.20)  | 8.34<br>(0.20)  | 8.34 (0.20)  |
| health adults 2017 Healthy BMI count of households persons                                       | 32.92<br>(0.81) | 32.92<br>(0.81) | 32.92 (0.81) |
| health adults 2017 Overweight BMI count of households persons                                    | 32.73<br>(0.29) | 32.73<br>(0.29) | 32.73 (0.29) |
| health adults 2017 Obese BMI count of households persons                                         | 29.18<br>(1.19) | 29.19<br>(1.19) | 29.19 (1.19) |
| health adults 2017 All without usual healthcare count of households persons                      | 13.42<br>(0.54) | 13.42<br>(0.54) | 13.42 (0.54) |
| health adults 2017 All with usual healthcare count of households persons                         | 85.79<br>(0.62) | 85.79<br>(0.62) | 85.79 (0.62) |
| health adults 2017 Regular healthcare with doctor or HMO count of households persons             | 62.65<br>(1.06) | 62.65<br>(1.06) | 62.65 (1.06) |
| health adults 2017 Regular healthcare at clinic or healthcare center count of households persons | 19.68<br>(0.60) | 19.68<br>(0.61) | 19.68 (0.61) |
| health adults 2017 Regular healthcare some other place count of households persons               | 0.91<br>(0.02)  | 0.91<br>(0.02)  | 0.91 (0.02)  |
| health adults 2017 No doctor visit within 12 months count of households persons                  | 17.34<br>(0.51) | 17.34<br>(0.51) | 17.34 (0.51) |
| health adults 2017 Sinusitis count of households persons                                         | 12.29<br>(0.27) | 12.29<br>(0.27) | 12.29 (0.27) |
| health adults 2017 1 doctor visit within 12 months count of households persons                   | 16.97<br>(0.35) | 16.97<br>(0.35) | 16.97 (0.35) |
| health adults 2017 2-3 doctor visits within 12 months count of households persons                | 26.23<br>(0.46) | 26.23<br>(0.46) | 26.23 (0.46) |
| health adults 2017 4-9 doctors visits within 12 months count of households persons               | 23.79<br>(0.59) | 23.79<br>(0.59) | 23.79 (0.59) |

|                                                                                                       |                 |                 |              |
|-------------------------------------------------------------------------------------------------------|-----------------|-----------------|--------------|
| health adults 2017 10+ doctors visits within 12 months count of households persons                    | 13.98<br>(0.36) | 13.98<br>(0.36) | 13.98 (0.36) |
| health adults 2017 Doctor visit within last 6 months count of households persons                      | 68.91<br>(0.95) | 68.91<br>(0.95) | 68.91 (0.95) |
| health adults 2017 Doctor visits between 6 months less than 1 year count of households persons        | 13.64<br>(0.36) | 13.64<br>(0.36) | 13.64 (0.36) |
| health adults 2017 Doctor visit more than 1 year less than 2 years count of households persons        | 7.51<br>(0.31)  | 7.51<br>(0.31)  | 7.51 (0.31)  |
| health adults 2017 Doctor visit more than 2 years less than 5 years count of households persons       | 4.49<br>(0.13)  | 4.49<br>(0.13)  | 4.49 (0.13)  |
| health adults 2017 Doctor visit more than 5 years count of households persons                         | 2.75<br>(0.08)  | 2.75<br>(0.08)  | 2.75 (0.08)  |
| health adults 2017 Never had a doctor's visit count of households persons                             | 1.02<br>(0.05)  | 1.02<br>(0.05)  | 1.02 (0.05)  |
| health children 2017 No missing school days among school aged population count of households persons  | 26.60<br>(1.55) | 26.62<br>(1.57) | 26.62 (1.57) |
| health children 2017 1-2 missed school days among school aged population count of households persons  | 29.18<br>(0.26) | 29.18<br>(0.26) | 29.18 (0.26) |
| health children 2017 3-5 missed school days among school aged population count of households persons  | 24.25<br>(0.06) | 24.25<br>(0.06) | 24.25 (0.06) |
| health children 2017 6-10 missed school days among school aged population count of households persons | 9.64<br>(0.11)  | 9.64<br>(0.12)  | 9.64 (0.12)  |
| health children 2017 11+ school days missed among school aged population count of households persons  | 4.10<br>(0.07)  | 4.10<br>(0.07)  | 4.10 (0.07)  |
| health children 2017 Not enrolled in school among school aged population count of households persons  | 0.52<br>(0.03)  | 0.52<br>(0.03)  | 0.52 (0.03)  |
| health children 2017 no ER visit within past 12 months count of households persons                    | 82.58<br>(0.49) | 82.57<br>(0.49) | 82.57 (0.49) |
| health children 2017 with 1 ER visits past 12 months count of households persons                      | 11.52<br>(0.25) | 11.53<br>(0.25) | 11.53 (0.25) |
| health children 2017 2+ ER visits in past 12 months count of households persons                       | 5.38<br>(0.28)  | 5.38<br>(0.28)  | 5.38 (0.28)  |
| health children 2017 in special education count of households persons                                 | 7.86<br>(0.08)  | 7.86<br>(0.08)  | 7.86 (0.08)  |
| health children 2017 ever told had asthma count of households persons                                 | 12.97<br>(0.28) | 12.97<br>(0.28) | 12.97 (0.28) |
| health children 2017 still have asthma count of households persons                                    | 8.36<br>(0.37)  | 8.36<br>(0.38)  | 8.36 (0.38)  |
| health children 2017 with hay fever count of households persons                                       | 8.39<br>(0.12)  | 8.39<br>(0.12)  | 8.39 (0.12)  |
| health children 2017 with respiratory allergies count of households persons                           | 10.12<br>(0.12) | 10.12<br>(0.12) | 10.12 (0.12) |
| health children 2017 with food allergies count of households persons                                  | 5.76<br>(0.08)  | 5.76<br>(0.08)  | 5.76 (0.08)  |
| health children 2017 with skin allergies count of households persons                                  | 11.91<br>(0.40) | 11.91<br>(0.40) | 11.91 (0.40) |
| health children 2017 population 3-17 with learning disabilities count of households persons           | 7.27<br>(0.14)  | 7.27<br>(0.14)  | 7.27 (0.14)  |
| health children 2017 population 3-17 with ADHD count of households persons                            | 9.52<br>(0.17)  | 9.52<br>(0.17)  | 9.52 (0.17)  |

|                                                                                                                           |                 |                 |              |
|---------------------------------------------------------------------------------------------------------------------------|-----------------|-----------------|--------------|
| health children 2017 year with prescribed medication for at least 3 months count of households persons                    | 13.21<br>(0.20) | 13.21<br>(0.20) | 13.21 (0.20) |
| health children 2017 Health status respondent assessed as excellent count of households persons                           | 57.94<br>(1.09) | 57.94<br>(1.09) | 57.94 (1.09) |
| health children 2017 Health status respondent assessed as very good count of households persons                           | 25.25<br>(0.17) | 25.25<br>(0.17) | 25.25 (0.17) |
| health children 2017 Health status respondent assessed as good count of households persons                                | 13.45<br>(0.90) | 13.46<br>(0.90) | 13.46 (0.90) |
| health children 2017 Health status respondent assessed as fair or poor count of households persons                        | 1.74<br>(0.14)  | 1.74<br>(0.14)  | 1.74 (0.14)  |
| health children 2017 All without usual healthcare count of households persons                                             | 3.98<br>(0.17)  | 3.98<br>(0.17)  | 3.98 (0.17)  |
| health children 2017 All with usual healthcare count of households persons                                                | 95.91<br>(0.16) | 95.91<br>(0.16) | 95.91 (0.16) |
| health children 2017 All persons with usual healthcare at clinic count of households persons                              | 24.13<br>(1.71) | 24.13<br>(1.71) | 24.13 (1.71) |
| health children 2017 All persons with usual healthcare at doctor office count of households persons                       | 70.04<br>(2.12) | 70.03<br>(2.12) | 70.03 (2.12) |
| health children 2017 All persons with usual healthcare at ER count of households persons                                  | 0.43<br>(0.07)  | 0.43<br>(0.07)  | 0.43 (0.07)  |
| health children 2017 All persons with usual healthcare at hospital outpatient count of households persons                 | 0.72<br>(0.08)  | 0.72<br>(0.08)  | 0.72 (0.08)  |
| health children 2017 All persons with usual healthcare at other facility count of households persons                      | 0.28<br>(0.07)  | 0.28<br>(0.07)  | 0.28 (0.07)  |
| health children 2017 Doctor visit within 6months or less count of households persons                                      | 76.33<br>(0.19) | 76.33<br>(0.19) | 76.33 (0.19) |
| health children 2017 Doctor visit more than 6 months less than 1 year count of households persons                         | 15.77<br>(0.10) | 15.77<br>(0.10) | 15.77 (0.10) |
| health children 2017 Doctor visit more than 1 year less than 2 years count of households persons                          | 4.35<br>(0.07)  | 4.35<br>(0.07)  | 4.35 (0.07)  |
| health children 2017 Doctor visit more than 2 years less than 5 years count of households persons                         | 0.95<br>(0.03)  | 0.95<br>(0.03)  | 0.95 (0.03)  |
| health children 2017 Doctor visit more than 5 years count of households persons                                           | 1.69<br>(0.09)  | 1.69<br>(0.09)  | 1.69 (0.09)  |
| health children 2017 Uninsured for healthcare count of households persons                                                 | 4.46<br>(0.18)  | 4.46<br>(0.18)  | 4.46 (0.18)  |
| health children 2017 Unmet medical need count of households persons                                                       | 1.40<br>(0.09)  | 1.40<br>(0.09)  | 1.40 (0.09)  |
| health children 2017 Delayed care due to cost count of households persons                                                 | 2.37<br>(0.09)  | 2.37<br>(0.09)  | 2.37 (0.09)  |
| health children 2017 Children 2-17 years with unmet dental need count of households persons                               | 4.14<br>(0.17)  | 4.14<br>(0.17)  | 4.14 (0.17)  |
| health children 2017 Children 2-17years no unmet dental need count of households persons                                  | 94.95<br>(0.13) | 94.95<br>(0.13) | 94.95 (0.13) |
| health children 2017 Children 2 17years with dental visit within last 6months count of households persons                 | 66.84<br>(0.37) | 66.84<br>(0.37) | 66.84 (0.37) |
| health children 2017 Children 2-17years with dental visit more than 6 months less than 1 year count of households persons | 16.61<br>(0.32) | 16.61<br>(0.32) | 16.61 (0.32) |
| health children 2017 Children 2-17years dental visit more than 1 year less than 2 years count of households persons       | 5.36<br>(0.15)  | 5.36<br>(0.15)  | 5.36 (0.15)  |

|                                                                                                                      |                      |                      |                      |
|----------------------------------------------------------------------------------------------------------------------|----------------------|----------------------|----------------------|
| health children 2017 Children 2-17years dental visit more than 2 years less than 5 years count of households persons | 1.96<br>(0.06)       | 1.96<br>(0.06)       | 1.96 (0.06)          |
| health children 2017 Children 2-17years dental visit more than 5 years count of households persons                   | 1994.18<br>(6000.49) | 1984.88<br>(5982.39) | 1984.88<br>(5982.39) |

Children aged less than 18 years unless otherwise indicated  
Adults aged 18+ years

Appendix D.1. Adult & Child Disease second order variables, expressed as 2017 county per capita or per capita %, eligible for feature selection, for each outcome

| <b>Log ER Visits (2,475)</b>                                                                                                                                                       |                          |
|------------------------------------------------------------------------------------------------------------------------------------------------------------------------------------|--------------------------|
| <i>Variable Name</i>                                                                                                                                                               | <i>Mean (SD)</i>         |
| health adults 2017 Aerobic exercise only insufficiently active count of households persons*health children 2017 dental visits more than 5 years count of households persons        | 39640.24<br>(120857.87)  |
| health adults 2017 Alcohol lifetime abstainer count of households persons *health children 2017 dental visits more than 5 years count of households persons                        | 40522.99<br>(126770.19)  |
| health adults 2017 Alcohol current infrequent user count of households persons*health children 2017 dental visits more than 5 years count of households persons                    | 26035.16<br>(78333.81)   |
| health children 2017 Hay fever count of households persons *health children 2017 dental visits more than 5 years count of households persons                                       | 16688.88<br>(50100.51)   |
| health adults 2017 Overweight BMI count of households persons*health children 2017 dental visits more than 5 years count of households persons                                     | 65203.07<br>(196564.58)  |
| health children 2017 11+ missed school days among school aged population* health children 2017 dental visits more than 5 years                                                     | 8049.99<br>(24162.24)    |
| health children 2017 No ER visit last 12 months count of households persons *health children 2017 dental visits more than 5 years count of households persons                      | 164920.75<br>(496660.77) |
| health children 2017 2+ ER visits in past 12 months count of households persons *health children 2017 dental visits more than 5 years count of households persons                  | 10461.64<br>(31353.39)   |
| health children 2017 prescribed medication for at least 3 months count of households persons*health children 2017 dental visits more than 5 years count of households persons      | 26172.15<br>(78427.54)   |
| health children 2017 Health status respondent assessed fair or poor count of households persons*health children 2017 dental visits more than 5 years count of households persons   | 3324.72<br>(9960.50)     |
| health children 2017 All persons with usual healthcare at ER count of households persons *health children 2017 dental visits more than 5 years count of households persons         | 847.93<br>(2532.67)      |
| health children 2017 Doctor visit more than 2 years less than 5 years count of households persons*health children 2017 dental visits more than 5 years count of households persons | 1845.43<br>(5532.06)     |
| health children 2017 Doctor visit more than 1 year less than 2 years count of households persons*health children 2017 dental visits more than 5 years count of households persons  | 8535.48<br>(25591.10)    |
| health children 2017 Uninsured for healthcare count of households persons *health children 2017 dental visits more than 5 years count of households persons                        | 8552.85<br>(25534.90)    |
| health children 2017 Delayed care due to cost *health children 2017 dental visits more than 5 years                                                                                | 4570.19<br>(13641.73)    |
| <b>Log IP Days (2,491)</b>                                                                                                                                                         |                          |
| <i>Variable Name</i>                                                                                                                                                               | <i>Mean (SD)</i>         |
| health adults 2017 Aerobic exercise only insufficiently active count of households persons*health children 2017 dental visits more than 5 years count of households persons        | 39454.95<br>(120492.82)  |
| health adults 2017 Aerobic and strength exercise met aerobic only count of households persons *health children 2017 dental visits more than 5 years count of households persons    | 55714.84<br>(171375.76)  |
| health adults 2017 Alcohol current infrequent user count of households persons *health children 2017 dental visits more than 5 years count of households persons                   | 25914.05<br>(78097.46)   |
| health adults 2017 Underweight BMI count of households persons*health children 2017 dental visits more than 5 years count of households persons                                    | 3681.33<br>(11500.98)    |

|                                                                                                                                                                                    |                          |
|------------------------------------------------------------------------------------------------------------------------------------------------------------------------------------|--------------------------|
| health adults 2017 Overweight BMI count of households persons*health children 2017 dental visits more than 5 years count of households persons                                     | 64898.58<br>(195971.61)  |
| health adults 2017 Regular healthcare some other place count of households persons *health children 2017 dental visits more than 5 years count of households persons               | 1809.41<br>(5457.93)     |
| health adults 2017 Never had doctor visit count of households persons*health children 2017 dental visits more than 5 years count of households persons                             | 1968.61<br>(5956.28)     |
| health children 2017 3-5 missed school days aged 5 17 count of households persons*health children 2017 dental visits more than 5 years count of households persons                 | 48100.81<br>(144876.78)  |
| health children 2017 6-10 missed school days aged 5 17 count of households persons*health children 2017 dental visits more than 5 years count of households persons                | 19040.24<br>(57250.43)   |
| health children 2017 2+ ER visits past 12 months count of households persons*health children 2017 dental visits more than 5 years count of households persons                      | 10413.82<br>(31258.63)   |
| health children 2017 still have asthma count of households persons*health children 2017 dental visits more than 5 years count of households persons                                | 16708.54<br>(50211.73)   |
| health children 2017 with skin allergies count of households persons*health children 2017 dental visits more than 5 years count of households persons                              | 23892.52<br>(72017.84)   |
| health children 2017 Doctor visit more than 1 year less than 2 years count of households persons *health children 2017 dental visits more than 5 years count of households persons | 8495.84<br>(25513.91)    |
| health children 2017 Doctor visit more than 5 years count of households persons *health children 2017 dental visits more than 5 years count of households persons                  | 3319.40<br>(10100.16)    |
| health children 2017 no unmet dental needs count of households persons*health children 2017 dental visits more than 5 years count of households persons                            | 188593.41<br>(568466.65) |
| <b>Log Hospital Expenditures (2,491)</b>                                                                                                                                           |                          |
| <i>Variable Name</i>                                                                                                                                                               | <i>Mean (SD)</i>         |
| health adults 2017 HIV ever tested count of households persons*health children 2017 dental visits more than 5 years count of households persons                                    | 73352.55<br>(226145.99)  |
| health adults 2017 Cervical cancer count of households persons*health children 2017 dental visits more than 5 years count of households persons                                    | 857.87<br>(2556.77)      |
| health adults 2017 Kidney disease count of households persons*health children 2017 dental visits more than 5 years count of households persons                                     | 3825.31<br>(11125.88)    |
| health adults 2017 Ever had asthma count of households persons*health children 2017 dental visits more than 5 years count of households persons                                    | 25293.54<br>(76561.12)   |
| health adults 2017 Still have asthma count of households persons *health children 2017 dental visits more than 5 years count of households persons                                 | 15208.90<br>(45922.96)   |
| health adults 2017 Underweight BMI count of households persons*health children 2017 dental visits more than 5 years count of households persons                                    | 3681.33<br>(11500.98)    |
| health adults 2017 Obese BMI count of households persons*health children 2017 dental visits more than 5 years count of households persons                                          | 57875.55<br>(173837.77)  |
| health adults 2017 Regular healthcare some other place count of households persons*health children 2017 dental visits more than 5 years count of households persons                | 1809.41<br>(5457.93)     |
| health children 2017 3-5 missed school days aged 5 17 count of households persons*health children 2017 dental visits more than 5 years count of households persons                 | 48100.81<br>(144876.78)  |
| health children 2017 with respiratory allergies count of households persons*health children 2017 dental visits more than 5 years count of households persons                       | 20011.37<br>(60100.75)   |
| health children 2017 Children 3-17 with ADHD count of households persons*health children 2017 dental visits more than 5 years count of households persons                          | 18807.38<br>(56400.12)   |
| health children 2017 Doctor visit more than 6 months less than 1 year count of households persons*health children 2017 dental visits more than 5 years count of households persons | 31303.56<br>(94306.19)   |

|                                                                                                                                                                                      |                          |
|--------------------------------------------------------------------------------------------------------------------------------------------------------------------------------------|--------------------------|
| health children 2017 Doctor visit more than 5 years count of households persons*health children 2017 dental visits more than 5 years count of households persons                     | 3319.40<br>(10100.16)    |
| health children 2017 Delayed care due to cost count of households persons *health children 2017 dental visits more than 5 years count of households persons                          | 4549.12<br>(13600.57)    |
| health children 2017 Children 2-17years dental visit less than 6 months count of households persons*health children 2017 dental visits more than 5 years count of households persons | 133059.37<br>(401132.97) |

Children aged less than 18 years unless otherwise indicated

Adults aged 18+ years

An \* is placed between 2 features to indicate interaction



Appendix E. Community characteristics main effect variables, expressed as 2017 county per capita or per capita percent, eligible for feature selection, for each outcome (N variables =151)

| <b>Outcome (Per Capita)</b>                                                                   | <b>ER Visits<br/>(N=2475)</b> | <b>Inpatient<br/>Days<br/>(N=2491)</b> | <b>Hospital<br/>Expenditures<br/>(N=2491)</b> |
|-----------------------------------------------------------------------------------------------|-------------------------------|----------------------------------------|-----------------------------------------------|
| <i>Variable Name</i>                                                                          | <i>Mean (SD)</i>              | <i>Mean (SD)</i>                       | <i>Mean (SD)</i>                              |
| census employment 2017 Employee uses own car, truck or van to commute to work empl 16 persons | 46.01 (7.04)                  | 46.02 (7.04)                           | 46.02 (7.04)                                  |
| census employment 2017 Own car, truck or van to commute to work alone empl 16 persons         | 40.37 (6.67)                  | 40.37 (6.67)                           | 40.37 (6.67)                                  |
| census employment 2017 Own car, truck or van_ to commute to work in carpool empl 16 persons   | 5.65 (1.62)                   | 5.64 (1.62)                            | 5.64 (1.62)                                   |
| census employment 2017 Public transportation to commute to work empl 16 persons               | 0.64 (1.96)                   | 0.64 (1.96)                            | 0.64 (1.96)                                   |
| census employment 2017 Bus or trolley bus to commute to work empl 16 persons                  | 0.46 (0.95)                   | 0.46 (0.95)                            | 0.46 (0.95)                                   |
| census employment 2017 Streetcar or trolley car to commute to work empl 16 persons            | 0.01 (0.05)                   | 0.01 (0.05)                            | 0.01 (0.05)                                   |
| census employment 2017 Subway or elevated train to commute to work empl 16 persons            | 0.10 (1.18)                   | 0.10 (1.17)                            | 0.10 (1.17)                                   |
| census employment 2017 Railroad to commute to work empl 16 persons                            | 0.05 (0.34)                   | 0.05 (0.34)                            | 0.05 (0.34)                                   |
| census employment 2017 Ferry to commute to work empl 16 persons                               | 0.01 (0.09)                   | 0.01 (0.09)                            | 0.01 (0.09)                                   |
| census employment 2017 Taxi to commute to work empl 16 persons                                | 0.04 (0.13)                   | 0.04 (0.13)                            | 0.04 (0.13)                                   |
| census employment 2017 Own motorcycle to commute to work empl 16 persons                      | 0.12 (0.12)                   | 0.12 (0.12)                            | 0.12 (0.12)                                   |
| census employment 2017 Own bicycle to commute to work empl 16 persons                         | 0.23 (0.42)                   | 0.23 (0.42)                            | 0.23 (0.42)                                   |
| census employment 2017 Walked to work as commute empl 16 persons                              | 1.76 (1.55)                   | 1.75 (1.54)                            | 1.75 (1.54)                                   |
| census employment 2017 Other transportation to commute to work empl 16 persons                | 0.52 (0.54)                   | 0.52 (0.53)                            | 0.52 (0.53)                                   |
| census employment 2017 Employee works at home empl 16 persons                                 | 2.54 (1.66)                   | 2.53 (1.65)                            | 2.53 (1.65)                                   |
| census employment 2017 Employee travel time less than 15 min empl 16 persons                  | 19.57 (7.85)                  | 19.54 (7.85)                           | 19.54 (7.85)                                  |
| census employment 2017 Employee travel time between 15-.29 min empl 16 persons                | 15.15 (4.85)                  | 15.15 (4.85)                           | 15.15 (4.85)                                  |
| census employment 2017 Employee travel time between 30-59 min empl 16 persons                 | 10.97 (4.68)                  | 10.99 (4.69)                           | 10.99 (4.69)                                  |
| census employment 2017 Employee travel time between 60-89 min empl 16 persons                 | 2.34 (1.61)                   | 2.34 (1.61)                            | 2.34 (1.61)                                   |
| census employment 2017 Employee travel time 90 min empl 16 persons                            | 1.29 (0.81)                   | 1.29 (0.81)                            | 1.29 (0.81)                                   |

|                                                                                                     |              |              |              |
|-----------------------------------------------------------------------------------------------------|--------------|--------------|--------------|
| census employment 2017 Employment Potential pop 16 persons                                          | 98.34 (0.28) | 98.34 (0.28) | 98.34 (0.28) |
| census employment 2017 Employed civilian males pop 16 persons                                       | 27.51 (4.61) | 27.50 (4.61) | 27.50 (4.61) |
| census employment 2017 Employed civilian females pop 16 persons                                     | 24.35 (3.79) | 24.35 (3.79) | 24.35 (3.79) |
| census employment 2017 Employed armed forces male pop 16 persons                                    | 0.30 (1.48)  | 0.30 (1.47)  | 0.30 (1.47)  |
| census employment 2017 Employed armed forces female pop 16 persons                                  | 0.05 (0.20)  | 0.05 (0.20)  | 0.05 (0.20)  |
| census employment 2017 Unemployed males pop 16 persons                                              | 1.38 (0.38)  | 1.38 (0.38)  | 1.38 (0.38)  |
| census employment 2017 Unemployed females pop 16 persons                                            | 1.23 (0.35)  | 1.23 (0.35)  | 1.23 (0.35)  |
| census employment 2017 Not in the labor force males pop 16 persons                                  | 19.58 (5.16) | 19.58 (5.16) | 19.58 (5.16) |
| census employment 2017 Not in the labor force female pop 16 persons                                 | 23.94 (3.83) | 23.95 (3.83) | 23.95 (3.83) |
| census employment 2017 Employed civilian total pop 16 persons                                       | 51.86 (7.75) | 51.85 (7.75) | 51.85 (7.75) |
| census employment 2017 Employed in agriculture forestry fishing and hunting pop 16 persons          | 2.43 (3.06)  | 2.42 (3.05)  | 2.42 (3.05)  |
| census employment 2017 Employed in mining quarrying and oil and gas extraction pop 16 persons       | 0.84 (1.95)  | 0.84 (1.94)  | 0.84 (1.94)  |
| census employment 2017 Employed in construction pop 16 persons                                      | 3.62 (1.23)  | 3.62 (1.23)  | 3.62 (1.23)  |
| census employment 2017 Employed in manufacturing pop 16 persons                                     | 6.21 (3.64)  | 6.21 (3.64)  | 6.21 (3.64)  |
| census employment 2017 Employed in wholesale trade pop 16 persons                                   | 1.31 (0.65)  | 1.31 (0.65)  | 1.31 (0.65)  |
| census employment 2017 Employed in retail trade pop 16 persons                                      | 5.97 (1.40)  | 5.97 (1.41)  | 5.97 (1.41)  |
| census employment 2017 Employed in transportation and warehousing pop 16 persons                    | 2.14 (0.91)  | 2.14 (0.91)  | 2.14 (0.91)  |
| census employment 2017 Employed in utilities pop 16 persons                                         | 0.65 (0.54)  | 0.65 (0.54)  | 0.65 (0.54)  |
| census employment 2017 Employed in information pop 16 persons                                       | 0.82 (0.49)  | 0.82 (0.49)  | 0.82 (0.49)  |
| census employment 2017 Employed in finance and insurance pop 16 persons                             | 1.85 (1.03)  | 1.85 (1.03)  | 1.85 (1.03)  |
| census employment 2017 Employed in real estate and rental and leasing pop 16 persons                | 0.69 (0.46)  | 0.69 (0.46)  | 0.69 (0.46)  |
| census employment 2017 Employed in professional scientific and technical services pop 16 persons    | 1.97 (1.59)  | 1.97 (1.58)  | 1.97 (1.58)  |
| census employment 2017 Employed in management of companies and enterprises pop 16 persons           | 0.03 (0.06)  | 0.03 (0.06)  | 0.03 (0.06)  |
| census employment 2017 Employed in administrative and support and waste mgt services pop 16 persons | 1.63 (0.72)  | 1.64 (0.72)  | 1.64 (0.72)  |
| census employment 2017 Employed in educational services pop 16 persons                              | 4.90 (1.90)  | 4.90 (1.90)  | 4.90 (1.90)  |
| census employment 2017 Employed in healthcare and social assistance pop 16 persons                  | 7.15 (1.86)  | 7.15 (1.86)  | 7.15 (1.86)  |
| census employment 2017 Employed in arts entertainment and recreation pop 16 persons                 | 0.92 (0.80)  | 0.92 (0.80)  | 0.92 (0.80)  |

|                                                                                                       |                         |                         |                         |
|-------------------------------------------------------------------------------------------------------|-------------------------|-------------------------|-------------------------|
| census employment 2017 Employed in accommodation and food services pop 16 persons                     | 3.37 (1.44)             | 3.37 (1.44)             | 3.37 (1.44)             |
| census employment 2017 Employed in other services pop 16 persons                                      | 2.50 (0.71)             | 2.50 (0.71)             | 2.50 (0.71)             |
| census employment 2017 Employed in public administration pop 16 persons                               | 2.83 (1.49)             | 2.84 (1.49)             | 2.84 (1.49)             |
| census employment 2017 Occupation management, business and financial operations pop 16 persons        | 6.78 (2.84)             | 6.77 (2.83)             | 6.77 (2.83)             |
| census employment 2017 Occupation professional and related pop 16 persons                             | 9.68 (3.02)             | 9.68 (3.02)             | 9.68 (3.02)             |
| census employment 2017 Occupation sales and office pop 16 persons                                     | 11.50 (2.45)            | 11.50 (2.45)            | 11.50 (2.45)            |
| census employment 2017 Occupation service pop 16 persons                                              | 9.54 (1.91)             | 9.54 (1.91)             | 9.54 (1.91)             |
| census employment 2017 Occupation farming, fishing and forestry pop 16 persons                        | 1.00 (1.24)             | 1.00 (1.24)             | 1.00 (1.24)             |
| census employment 2017 Occupation construction, extraction and maintenance pop 16 persons             | 5.41 (1.85)             | 5.41 (1.85)             | 5.41 (1.85)             |
| census employment 2017 Occupation production, transportation and material moving pop 16 persons       | 7.95 (2.97)             | 7.96 (2.97)             | 7.96 (2.97)             |
| census employment 2017 employed white collar job pop 16 persons                                       | 27.96 (6.78)            | 27.95 (6.78)            | 27.95 (6.78)            |
| census employment 2017 Employed blue collar job pop 16 persons                                        | 13.36 (3.70)            | 13.36 (3.70)            | 13.36 (3.70)            |
| census employment 2017 Employed in private for profit wage and salary workers pop 16 persons          | 32.51 (6.60)            | 32.50 (6.60)            | 32.50 (6.60)            |
| census employment 2017 Employed private for profit wage and salary workers self pop 16 persons        | 1.88 (0.94)             | 1.88 (0.94)             | 1.88 (0.94)             |
| census employment 2017 Employed private not for profit wage and salary workers pop 16 persons         | 4.12 (1.81)             | 4.11 (1.81)             | 4.11 (1.81)             |
| census employment 2017 Employed local government workers pop 16 persons                               | 4.44 (1.67)             | 4.44 (1.67)             | 4.44 (1.67)             |
| census employment 2017 Employed state government workers pop 16 persons                               | 3.18 (1.87)             | 3.19 (1.87)             | 3.19 (1.87)             |
| census employment 2017 Employed federal government workers pop 16 persons                             | 1.42 (1.43)             | 1.42 (1.42)             | 1.42 (1.42)             |
| census employment 2017 Employed self-employed workers in own not incorporated business pop 16 persons | 4.17 (2.20)             | 4.16 (2.20)             | 4.16 (2.20)             |
| census employment 2017 Employed unpaid family workers pop 16 persons                                  | 0.14 (0.21)             | 0.14 (0.21)             | 0.14 (0.21)             |
| census housing units 2017 House median year built count year                                          | 1975.47<br>(10.94)      | 1975.48<br>(10.92)      | 1975.48<br>(10.92)      |
| census housing units 2017 House median year moved In count year                                       | 2002.42<br>(1.04)       | 2002.42<br>(1.04)       | 2002.42<br>(1.04)       |
| census housing units 2017 House median rent count                                                     | 534.03<br>(200.92)      | 533.80<br>(200.72)      | 533.80<br>(200.72)      |
| census housing units 2017 House median value owner households count                                   | 136327.77<br>(80977.73) | 136245.36<br>(80842.33) | 136245.36<br>(80842.33) |
| census housing units 2017 House heating fuel utility gas count housing units                          | 32.06<br>(20.52)        | 32.03<br>(20.51)        | 32.03 (20.51)           |

|                                                                                                          |               |               |               |
|----------------------------------------------------------------------------------------------------------|---------------|---------------|---------------|
| census housing units 2017 House heating fuel bottled tank or LP gas count housing units                  | 0.17 (0.41)   | 0.17 (0.41)   | 0.17 (0.41)   |
| census housing units 2017 House heating fuel electricity count housing units                             | 32.29 (19.80) | 32.37 (19.80) | 32.37 (19.80) |
| census housing units 2017 House heating fuel fuel oil, kerosene etc. count housing units                 | 4.03 (8.90)   | 4.02 (8.87)   | 4.02 (8.87)   |
| census housing units 2017 House heating fuel coal or coke count housing units                            | 0.17 (0.71)   | 0.17 (0.71)   | 0.17 (0.71)   |
| census housing units 2017 House heating fuel wood count housing units                                    | 4.19 (4.87)   | 4.18 (4.85)   | 4.18 (4.85)   |
| census housing units 2017 House heating fuel solar energy count housing units                            | 0.04 (0.12)   | 0.03 (0.12)   | 0.03 (0.12)   |
| census housing units 2017 House heating fuel other fuel count housing units                              | 0.64 (0.76)   | 0.64 (0.75)   | 0.64 (0.75)   |
| census housing units 2017 House heating fuel no fuel used count housing units                            | 0.38 (2.35)   | 0.38 (2.34)   | 0.38 (2.34)   |
| census housing units 2017 Houses occupied count housing units                                            | 83.96 (9.47)  | 83.98 (9.45)  | 83.98 (9.45)  |
| census housing units 2017 Houses vacant count housing units                                              | 16.04 (9.47)  | 16.02 (9.45)  | 16.02 (9.45)  |
| census housing units 2017 House vacant units for rent count housing units                                | 2.81 (1.18)   | 2.81 (1.19)   | 2.81 (1.19)   |
| census housing units 2017 House vacant units rented not occupied count housing units                     | 0.17 (0.16)   | 0.17 (0.16)   | 0.17 (0.16)   |
| census housing units 2017 House vacant units for sale count housing units                                | 1.44 (0.52)   | 1.44 (0.52)   | 1.44 (0.52)   |
| census housing units 2017 House vacant units sold not occupied count housing units                       | 0.46 (0.33)   | 0.46 (0.33)   | 0.46 (0.33)   |
| census housing units 2017 House vacant units seasonal recreational or occasional use count housing units | 6.25 (8.89)   | 6.22 (8.86)   | 6.22 (8.86)   |
| census housing units 2017 House vacant units for migrant workers count housing units                     | 0.05 (0.14)   | 0.05 (0.15)   | 0.05 (0.15)   |
| census housing units 2017 House vacant units vacant other count housing units                            | 4.87 (3.08)   | 4.87 (3.08)   | 4.87 (3.08)   |
| census housing units 2017 House structure with 1 unit detached count housing units                       | 59.12 (10.06) | 59.14 (10.05) | 59.14 (10.05) |
| census housing units 2017 House structure with 1 Unit attached count housing units                       | 2.42 (3.32)   | 2.41 (3.31)   | 2.41 (3.31)   |
| census housing units 2017 House structure with 2 units count housing units                               | 2.44 (2.03)   | 2.44 (2.02)   | 2.44 (2.02)   |
| census housing units 2017 House structure with 3-4 units count housing units                             | 2.72 (1.79)   | 2.72 (1.79)   | 2.72 (1.79)   |
| census housing units 2017 House structure with 5-9 units count housing units                             | 2.58 (1.83)   | 2.59 (1.83)   | 2.59 (1.83)   |
| census housing units 2017 House structure with 10-19 units count housing units                           | 1.90 (1.99)   | 1.90 (1.99)   | 1.90 (1.99)   |
| census housing units 2017 housing structure with 20-49 units count housing units                         | 1.39 (1.54)   | 1.39 (1.54)   | 1.39 (1.54)   |
| census housing units 2017 House structure with 50 units count housing units                              | 1.23 (2.36)   | 1.23 (2.35)   | 1.23 (2.35)   |

|                                                                                              |              |              |              |
|----------------------------------------------------------------------------------------------|--------------|--------------|--------------|
| census housing units 2017 House structure mobile home count housing units                    | 10.04 (7.27) | 10.06 (7.28) | 10.06 (7.28) |
| census housing units 2017 House structure boat,RV, Van or other count housing units          | 0.09 (0.21)  | 0.09 (0.21)  | 0.09 (0.21)  |
| census housing units 2017 House rent less than 250 count housing units                       | 2.93 (2.17)  | 2.93 (2.17)  | 2.93 (2.17)  |
| census housing units 2017 House rent 250-499 count housing units                             | 7.88 (4.15)  | 7.87 (4.15)  | 7.87 (4.15)  |
| census housing units 2017 House rent 500-749 count housing units                             | 6.79 (4.37)  | 6.79 (4.37)  | 6.79 (4.37)  |
| census housing units 2017 House rent 750-999 count housing units                             | 2.62 (3.00)  | 2.62 (3.00)  | 2.62 (3.00)  |
| census housing units 2017 House rent 1000-1249 count housing units                           | 1.22 (1.95)  | 1.22 (1.94)  | 1.22 (1.94)  |
| census housing units 2017 House rent 1250-1499 count housing units                           | 0.65 (1.33)  | 0.64 (1.32)  | 0.64 (1.32)  |
| census housing units 2017 House rent 1500-1999 count housing units                           | 0.49 (1.24)  | 0.48 (1.24)  | 0.48 (1.24)  |
| census housing units 2017 House rent 2000+ count housing units                               | 0.32 (0.95)  | 0.32 (0.95)  | 0.32 (0.95)  |
| census housing units 2017 House no cash rent count housing units                             | 3.09 (1.78)  | 3.09 (1.78)  | 3.09 (1.78)  |
| census housing units 2017 House owner households valued less than 10,000 count housing units | 1.50 (1.10)  | 1.50 (1.10)  | 1.50 (1.10)  |
| census housing units 2017 House owner households valued 10,000-14,999 count housing units    | 1.10 (0.84)  | 1.11 (0.84)  | 1.11 (0.84)  |
| census housing units 2017 House owner households valued 15,000-19,999 count housing units    | 0.97 (0.78)  | 0.97 (0.78)  | 0.97 (0.78)  |
| census housing units 2017 House owner household valued 20,000-24,999 count housing units     | 1.11 (0.95)  | 1.11 (0.95)  | 1.11 (0.95)  |
| census housing units 2017 House owner households valued 25,000-29,999 count housing units    | 0.99 (0.89)  | 0.99 (0.89)  | 0.99 (0.89)  |
| census housing units 2017 House owner households valued 30,000-34,999 count housing units    | 1.22 (1.06)  | 1.22 (1.06)  | 1.22 (1.06)  |
| census housing units 2017 House owner households valued 35,000-39,999 count housing units    | 0.86 (0.77)  | 0.86 (0.77)  | 0.86 (0.77)  |
| census housing units 2017 House owner households valued 40,000-49,999 count housing units    | 2.21 (1.71)  | 2.21 (1.71)  | 2.21 (1.71)  |
| census housing units 2017 House owner households valued 50,000-59,999 count housing units    | 2.53 (1.73)  | 2.54 (1.74)  | 2.54 (1.74)  |
| census housing units 2017 House owner households valued 60,000-69,999 count housing units    | 2.74 (1.79)  | 2.74 (1.78)  | 2.74 (1.78)  |
| census housing units 2017 House owner households valued 70,000-79,999 count housing units    | 2.98 (1.73)  | 2.98 (1.73)  | 2.98 (1.73)  |
| census housing units 2017 House owner households valued 80,000-89,999 count housing units    | 3.25 (1.71)  | 3.25 (1.71)  | 3.25 (1.71)  |
| census housing units 2017 House owner households valued 90,000-99,999 count housing units    | 2.54 (1.35)  | 2.54 (1.35)  | 2.54 (1.35)  |
| census housing units 2017 House owner households valued 100,000-124,999 count housing units  | 5.83 (2.38)  | 5.83 (2.37)  | 5.83 (2.37)  |

|                                                                                             |               |               |               |
|---------------------------------------------------------------------------------------------|---------------|---------------|---------------|
| census housing units 2017 House owner households valued 125,000-149,999 count housing units | 4.29 (2.08)   | 4.29 (2.08)   | 4.29 (2.08)   |
| census housing units 2017 House owner households valued 150,000-174,999 count housing units | 5.26 (2.21)   | 5.26 (2.21)   | 5.26 (2.21)   |
| census housing units 2017 House owner households valued 175,000-199,999 count housing units | 3.10 (1.72)   | 3.10 (1.72)   | 3.10 (1.72)   |
| census housing units 2017 House owner households valued 200,000-249,999 count housing units | 4.75 (2.64)   | 4.76 (2.65)   | 4.76 (2.65)   |
| census housing units 2017 House owner households valued 250,000-299,999 count housing units | 3.47 (2.46)   | 3.48 (2.47)   | 3.48 (2.47)   |
| census housing units 2017 House owner households valued 300,000-399,999 count housing units | 3.37 (3.18)   | 3.37 (3.18)   | 3.37 (3.18)   |
| census housing units 2017 House owner households valued 400,000-499,999 count housing units | 1.45 (1.86)   | 1.45 (1.86)   | 1.45 (1.86)   |
| census housing units 2017 House owner households valued 500,000-749,999 count housing units | 1.44 (2.20)   | 1.43 (2.20)   | 1.43 (2.20)   |
| census housing units 2017 House owner households valued 750,000-999,999 count housing units | 0.48 (0.93)   | 0.48 (0.93)   | 0.48 (0.93)   |
| census housing units 2017 House owner households valued 1,000,000+ count housing units      | 0.56 (0.99)   | 0.56 (0.99)   | 0.56 (0.99)   |
| census housing units 2017 House built 2010 or later count housing units                     | 8.90 (3.87)   | 8.90 (3.87)   | 8.90 (3.87)   |
| census housing units 2017 House built 2000-2009 count housing units                         | 11.46 (6.15)  | 11.46 (6.14)  | 11.46 (6.14)  |
| census housing units 2017 House built 1990-1999 count housing units                         | 13.37 (5.36)  | 13.38 (5.36)  | 13.38 (5.36)  |
| census housing units 2017 House built 1980-1989 count housing units                         | 12.36 (4.60)  | 12.37 (4.60)  | 12.37 (4.60)  |
| census housing units 2017 House built 1970-1979 count housing units                         | 15.49 (3.82)  | 15.50 (3.82)  | 15.50 (3.82)  |
| census housing units 2017 House built 1960-1969 count housing units                         | 9.69 (3.22)   | 9.70 (3.22)   | 9.70 (3.22)   |
| census housing units 2017 house built 1950-1959 count housing units                         | 9.10 (4.00)   | 9.10 (4.00)   | 9.10 (4.00)   |
| census housing units 2017 House built 1940-1949 count housing units                         | 4.99 (2.45)   | 4.98 (2.45)   | 4.98 (2.45)   |
| census housing units 2017 House built 1939 or earlier count housing units                   | 14.66 (10.91) | 14.61 (10.90) | 14.61 (10.90) |
| census housing units 2017 House year moved in 2010 or later count housing units             | 35.78 (7.36)  | 35.78 (7.35)  | 35.78 (7.35)  |
| census housing units 2017 House year moved in 2000 to 2009 count housing units              | 21.89 (3.80)  | 21.89 (3.80)  | 21.89 (3.80)  |
| census housing units 2017 House year moved in 1990 to 1999 count housing units              | 11.95 (2.07)  | 11.96 (2.08)  | 11.96 (2.08)  |
| census housing units 2017 House year moved in 1980 to 1989 count housing units              | 6.43 (1.63)   | 6.44 (1.63)   | 6.44 (1.63)   |
| census housing units 2017 House year moved in 1970-1979 count housing units                 | 4.95 (1.75)   | 4.96 (1.75)   | 4.96 (1.75)   |
| census housing units 2017 House year moved in 1969 or earlier count housing units           | 2.94 (1.37)   | 2.95 (1.37)   | 2.95 (1.37)   |

|                                                                                          |              |              |              |
|------------------------------------------------------------------------------------------|--------------|--------------|--------------|
| census housing units 2017 Housing units owner occupied count housing units               | 57.99 (8.38) | 58.02 (8.39) | 58.02 (8.39) |
| census housing units 2017 Housing units renter occupied count housing units              | 25.97 (7.97) | 25.97 (7.98) | 25.97 (7.98) |
| census housing units 2017 Housing owner households with any mortgage count housing units | 33.20 (8.81) | 33.21 (8.81) | 33.21 (8.81) |
| census housing units 2017 Housing owner households with no mortgage count housing units  | 24.79 (7.02) | 24.80 (7.02) | 24.80 (7.02) |

Employee and occupation information among population 16 years+

Appendix E.1. Community characteristic second order variables, expressed as 2017 county per capita or per capita %, eligible for feature selection, for each outcome

| <b>Log ER Visits (2,475)</b>                                                                                                                                       |                       |
|--------------------------------------------------------------------------------------------------------------------------------------------------------------------|-----------------------|
| <i>Variable Name</i>                                                                                                                                               | <i>Mean (SD)</i>      |
| census employment 2017 Car, truck, van to commute to work alone*census housing units 2017 Housing units renter occupied count housing units                        | 1049.43<br>(359.74)   |
| census employment 2017 Employee work at home*census housing units 2017 Housing units renter occupied count housing units                                           | 63.88<br>(42.41)      |
| census employment 2017 Employee travel time between 15-29 min*census housing units 2017 Housing units renter occupied count housing units                          | 407.56<br>(219.10)    |
| census employment 2017 Employee travel time between 30-59 min*census housing units 2017 Housing units renter occupied count housing units                          | 282.87<br>(159.14)    |
| census employment 2017 Employed agriculture forestry fishing and hunting*census housing units 2017 Housing units renter occupied count housing units               | 58.06<br>(71.71)      |
| census employment 2017 Employed wholesale trade*census housing units 2017 Housing units renter occupied count housing units                                        | 34.17<br>(19.85)      |
| census employment 2017 Employed healthcare and social assistance*census housing units 2017 Housing units renter occupied count housing units                       | 187.18<br>(79.67)     |
| census employment 2017 Occupation management business and financial operations*census housing units 2017 Housing units renter occupied count housing units         | 176.38<br>(94.37)     |
| census employment 2017 Occupation farming, fishing and forestry*census housing units 2017 Housing units renter occupied count housing units                        | 24.90<br>(34.21)      |
| census employment 2017 Employed self-employed workers in own not incorporated business*census housing units 2017 Housing units renter occupied count housing units | 103.24<br>(49.59)     |
| census housing units 2017 House median rent *census housing units 2017 Housing units renter occupied count housing units                                           | 14428.93<br>(9102.99) |
| census housing units 2017 House vacant units for migrant workers*census housing units 2017 Housing units renter occupied count housing units                       | 1.24<br>(3.45)        |
| census housing units 2017 Housing structure boat, RV, van or other*census housing units 2017 Housing units renter occupied count housing units                     | 2.34<br>(5.02)        |
| census housing units 2017 House rent less than 250 *census housing units 2017 Housing units renter occupied count housing units                                    | 79.14<br>(79.63)      |
| census housing units 2017 House owner households valued 250,000-299,999*census housing units 2017 Housing units renter occupied count housing units                | 91.28<br>(71.93)      |
| <b>Log IP Days (2,491)</b>                                                                                                                                         |                       |
| <i>Variable Name</i>                                                                                                                                               | <i>Mean (SD)</i>      |
| census employment 2017 Employed wholesale trade*census employment 2017 Employed healthcare and social assistance workers pop 16 persons                            | 9.68<br>(5.97)        |
| census employment 2017 Occupation construction, extraction and maintenance*census employment 2017 Employed healthcare and social assistance workers pop 16 persons | 38.39<br>(15.43)      |
| census employment 2017 Employee travel time between 30-59 min.*census employment 2017 Employed healthcare and social assistance workers pop 16 persons             | 79.11<br>(41.02)      |
| census employment 2017 Employee travel time between 60-89 min.*census employment 2017 Employed healthcare and social assistance workers pop 16 persons             | 16.39<br>(12.07)      |



|                                                                                                                                                                                             |                      |
|---------------------------------------------------------------------------------------------------------------------------------------------------------------------------------------------|----------------------|
| census employment 2017 Employed agriculture, forestry, fishing and hunting*census employment 2017 Employed healthcare and social assistance workers pop 16 persons                          | 17.60<br>(24.17)     |
| census employment 2017 Employed in private for profit wage and salary workers *census employment 2017 Employed healthcare and social assistance workers pop 16 persons                      | 235.74<br>(85.18)    |
| census housing units 2017 House heating fuel bottled tank or LP gas*census employment 2017 Employed healthcare and social assistance workers pop 16 persons                                 | 1.28<br>(3.06)       |
| census housing units 2017 Housing structure with 1 unit detached*census employment 2017 Employed healthcare and social assistance workers pop 16 persons                                    | 427.03<br>(144.41)   |
| census housing units 2017 Housing structure with 2 units*census employment 2017 Employed healthcare and social assistance workers pop 16 persons                                            | 18.18<br>(17.94)     |
| census housing units 2017 Housing structure with 5-9 units*census employment 2017 Employed healthcare and social assistance workers pop 16 persons                                          | 19.06<br>(15.39)     |
| census housing units 2017 Housing structure with 50 units*census employment 2017 Employed healthcare and social assistance workers pop 16 persons                                           | 9.59<br>(19.62)      |
| census housing units 2017 House year moved in 1990-1999*census employment 2017 Employed healthcare and social assistance workers pop 16 persons                                             | 85.78<br>(27.54)     |
| census housing units 2017 House year moved in 1969 or earlier*census employment 2017 Employed healthcare and social assistance workers pop 16 persons                                       | 21.62<br>(12.55)     |
| census housing units 2017 Housing units owner occupied*census employment 2017 Employed healthcare and social assistance workers pop 16 persons                                              | 417.44<br>(132.46)   |
| census housing units 2017 Housing units renter occupied*census employment 2017 Employed healthcare and social assistance workers pop 16 persons                                             | 187.13<br>(79.72)    |
| census housing units 2017 House owner households valued 35,000-39,999*census employment 2017 Employed healthcare and social assistance workers pop 16 persons                               | 6.08<br>(5.98)       |
| <b>Log Hospital Expenditures (2,491)</b>                                                                                                                                                    |                      |
| <i>Variable Name</i>                                                                                                                                                                        | <i>Mean<br/>(SD)</i> |
| census employment 2017 Employee walked to work*census employment 2017 Employee travel time between 30-59 min. work empl 16 persons                                                          | 17.23<br>(15.39)     |
| census employment 2017 Employed in agriculture, forestry, fishing and hunting*census employment 2017 Employee travel time between 30-59 min. work empl 16 persons                           | 22.66<br>(27.12)     |
| census employment 2017 Employed in healthcare and social assistance*census employment 2017 Employee travel time between 30-59 min. work empl 16 persons                                     | 79.11<br>(41.02)     |
| census employment 2017 Employed white collar*census employment 2017 Employee travel time between 30-59 min. work empl 16 persons                                                            | 317.19<br>(193.80)   |
| census employment 2017 Employed in private not for profit wage and salary workers*census employment 2017 Employee travel time between 30-59 min. work empl 16 persons                       | 45.54<br>(29.95)     |
| census housing units 2017 Housing structure with 10-19 units*census employment 2017 Employee travel time between 30-59 min. work empl 16 persons                                            | 22.33<br>(31.43)     |
| census housing units 2017 Housing structure with 20-49 units*census employment 2017 Employee travel time between 30-59 min. work empl 16 persons                                            | 16.06<br>(25.51)     |
| census housing units 2017 Housing structure with 50 units*census employment 2017 Employee travel time between 30-59 min. work empl 16 persons                                               | 16.27<br>(52.20)     |
| census housing units 2017 Housing unit renter occupied*census employment 2017 Employee travel time between 30-59 min. work empl 16 persons                                                  | 282.95<br>(158.74)   |
| census housing units 2017 census employment 2017 Employed in private for profit wage and salary workers*census employment 2017 Employee travel time between 30-59 min. work empl 16 persons | 369.86<br>(204.11)   |

|                                                                                                                                                         |                    |
|---------------------------------------------------------------------------------------------------------------------------------------------------------|--------------------|
| census housing units 2017 House heating fuel bottled tank or LP gas*census employment 2017 Employee travel time between 30-59 min. work empl 16 persons | 1.58<br>(3.22)     |
| census housing units 2017 House built 1990-1999*census employment 2017 Employee travel time between 30-59 min. work empl 16 persons                     | 152.91<br>(102.63) |
| census housing units 2017 House year moved in 2000-2009*census employment 2017 Employee travel time between 30-59 min. work empl 16 persons             | 247.05<br>(133.01) |
| census housing units 2017 House year moved in 1990-1999*census employment 2017 Employee travel time between 30-59 min. work empl 16 persons             | 133.32<br>(65.46)  |
| census housing units 2017 Housing unit owner occupied*census employment 2017 Employee travel time between 30-59 min. work empl 16 persons               | 652.41<br>(332.57) |

Employee and occupation information among population 16 years+

An \* is placed between 2 features to indicate interaction

Appendix F. Consumer expenditure main effect variables, expressed as 2017 county per capita, eligible for feature selection, for each outcome (N variables =571)

| <b>Outcome (Per Capita)</b>                                     | <b>ER Visits<br/>(N=2475)</b> | <b>Inpatient<br/>Days<br/>(N=2491)</b> | <b>Hospital<br/>Expenditures<br/>(N=2491)</b> |
|-----------------------------------------------------------------|-------------------------------|----------------------------------------|-----------------------------------------------|
| <i>Variable per capita (\$)</i>                                 | <i>Mean (SD)</i>              | <i>Mean (SD)</i>                       | <i>Mean (SD)</i>                              |
| expenditures food 2017 Total annual expenditures                | 22727.77<br>(2912.64)         | 22714.19<br>(2922.62)                  | 22714.19<br>(2922.62)                         |
| expenditures food 2017 food                                     | 2872.59<br>(341.98)           | 2870.75<br>(343.52)                    | 2870.75<br>(343.52)                           |
| expenditures food 2017 Food at home                             | 1638.26<br>(179.51)           | 1637.32<br>(180.25)                    | 1637.32<br>(180.25)                           |
| expenditures food 2017 Cereals and bakery products              | 212.15<br>(22.23)             | 212.04<br>(22.31)                      | 212.04<br>(22.31)                             |
| expenditures food 2017 Cereals and cereal products              | 71.29<br>(6.46)               | 71.26<br>(6.48)                        | 71.26<br>(6.48)                               |
| expenditures food 2017 Flour                                    | 3.69 (0.39)                   | 3.69 (0.39)                            | 3.69 (0.39)                                   |
| expenditures food 2017 Prepared flour mixes                     | 5.22 (0.43)                   | 5.22 (0.43)                            | 5.22 (0.43)                                   |
| expenditures food 2017 Ready to eat and cooked cereals          | 36.56<br>(3.36)               | 36.55<br>(3.37)                        | 36.55<br>(3.37)                               |
| expenditures food 2017 Rice                                     | 10.24<br>(1.09)               | 10.24<br>(1.09)                        | 10.24<br>(1.09)                               |
| expenditures food 2017 Pasta cornmeal and other cereal products | 15.25<br>(1.65)               | 15.24<br>(1.66)                        | 15.24<br>(1.66)                               |
| expenditures food 2017 Bakery products                          | 141.12<br>(15.93)             | 141.03<br>(16.00)                      | 141.03<br>(16.00)                             |
| expenditures food 2017 Bread                                    | 41.58<br>(4.53)               | 41.56<br>(4.55)                        | 41.56<br>(4.55)                               |
| expenditures food 2017 Cookies and crackers                     | 34.83<br>(4.22)               | 34.81<br>(4.24)                        | 34.81<br>(4.24)                               |
| expenditures food 2017 Frozen and refrigerated bakery products  | 11.21<br>(1.15)               | 11.21<br>(1.15)                        | 11.21<br>(1.15)                               |
| expenditures food 2017 Other bakery products                    | 53.49<br>(6.07)               | 53.46<br>(6.10)                        | 53.46<br>(6.10)                               |
| expenditures food 2017 Biscuits and rolls                       | 20.56<br>(2.38)               | 20.55<br>(2.39)                        | 20.55<br>(2.39)                               |
| expenditures food 2017 Cakes and cupcakes                       | 14.79<br>(1.56)               | 14.78<br>(1.57)                        | 14.78<br>(1.57)                               |
| expenditures food 2017 Bread and cracker products               | 2.38 (0.31)                   | 2.38 (0.31)                            | 2.38 (0.31)                                   |
| expenditures food 2017 Sweetrolls coffee cakes doughnuts        | 9.17 (1.00)                   | 9.17 (1.00)                            | 9.17 (1.00)                                   |
| expenditures food 2017 Pies tarts turnovers                     | 6.50 (0.87)                   | 6.49 (0.87)                            | 6.49 (0.87)                                   |
| expenditures food 2017 Meats poultry fish and eggs              | 363.25<br>(34.81)             | 363.11<br>(34.90)                      | 363.11<br>(34.90)                             |

|                                                                              |                   |                   |                   |
|------------------------------------------------------------------------------|-------------------|-------------------|-------------------|
| expenditures food 2017 Beef                                                  | 99.82<br>(11.37)  | 99.76<br>(11.42)  | 99.76<br>(11.42)  |
| expenditures food 2017 Ground beef                                           | 43.36<br>(4.26)   | 43.34<br>(4.28)   | 43.34<br>(4.28)   |
| expenditures food 2017 Roast                                                 | 14.83<br>(1.79)   | 14.83<br>(1.79)   | 14.83<br>(1.79)   |
| expenditures food 2017 Steak                                                 | 33.70<br>(4.50)   | 33.67<br>(4.52)   | 33.67<br>(4.52)   |
| expenditures food 2017 Other beef                                            | 8.49 (1.10)       | 8.48 (1.10)       | 8.48 (1.10)       |
| expenditures food 2017 Pork                                                  | 66.33<br>(6.04)   | 66.32<br>(6.05)   | 66.32<br>(6.05)   |
| expenditures food 2017 Bacon                                                 | 15.42<br>(1.50)   | 15.41<br>(1.51)   | 15.41<br>(1.51)   |
| expenditures food 2017 Pork chops                                            | 9.93 (0.84)       | 9.93 (0.84)       | 9.93 (0.84)       |
| expenditures food 2017 Ham                                                   | 12.60<br>(1.21)   | 12.60<br>(1.21)   | 12.60<br>(1.21)   |
| expenditures food 2017 Sausage                                               | 13.93<br>(1.33)   | 13.93<br>(1.33)   | 13.93<br>(1.33)   |
| expenditures food 2017 Other pork                                            | 14.37<br>(1.40)   | 14.36<br>(1.40)   | 14.36<br>(1.40)   |
| expenditures food 2017 Other meats                                           | 51.23<br>(5.24)   | 51.20<br>(5.25)   | 51.20<br>(5.25)   |
| expenditures food 2017 Frankfurters                                          | 9.32 (0.80)       | 9.32 (0.80)       | 9.32 (0.80)       |
| expenditures food 2017 Lunch meats cold cuts                                 | 35.86<br>(4.19)   | 35.84<br>(4.21)   | 35.84<br>(4.21)   |
| expenditures food 2017 expenditures food 2017<br>Lamb organ meats and others | 5.90 (0.54)       | 5.90 (0.54)       | 5.90 (0.54)       |
| expenditures food 2017 poultry                                               | 69.47<br>(5.96)   | 69.45<br>(5.97)   | 69.45<br>(5.97)   |
| expenditures food 2017 Fresh and frozen chickens                             | 56.07<br>(4.81)   | 56.05<br>(4.82)   | 56.05<br>(4.82)   |
| expenditures food 2017 Other poultry                                         | 13.27<br>(1.21)   | 13.27<br>(1.21)   | 13.27<br>(1.21)   |
| expenditures food 2017 Fish and seafood                                      | 50.61<br>(4.88)   | 50.60<br>(4.88)   | 50.60<br>(4.88)   |
| expenditures food 2017 Canned fish and seafood                               | 7.72 (0.70)       | 7.72 (0.70)       | 7.72 (0.70)       |
| expenditures food 2017 Fresh fish and shellfish                              | 25.22<br>(2.60)   | 25.21<br>(2.60)   | 25.21<br>(2.60)   |
| expenditures food 2017 Frozen fish and shellfish                             | 17.62<br>(1.73)   | 17.62<br>(1.73)   | 17.62<br>(1.73)   |
| expenditures food 2017 Eggs                                                  | 25.50<br>(2.33)   | 25.49<br>(2.33)   | 25.49<br>(2.33)   |
| expenditures food 2017 Dairy products                                        | 170.09<br>(20.93) | 169.96<br>(21.04) | 169.96<br>(21.04) |
| expenditures food 2017 Fresh milk and cream                                  | 57.71<br>(6.44)   | 57.68<br>(6.47)   | 57.68<br>(6.47)   |
| expenditures food 2017 Fresh milk all types                                  | 48.51<br>(5.19)   | 48.48<br>(5.22)   | 48.48<br>(5.22)   |

|                                                        |                   |                   |                   |
|--------------------------------------------------------|-------------------|-------------------|-------------------|
| expenditures food 2017 Cream                           | 9.28 (1.27)       | 9.28 (1.28)       | 9.28 (1.28)       |
| expenditures food 2017 Other dairy products            | 112.53<br>(14.54) | 112.44<br>(14.61) | 112.44<br>(14.61) |
| expenditures food 2017 Butter                          | 10.54<br>(1.26)   | 10.53<br>(1.26)   | 10.53<br>(1.26)   |
| expenditures food 2017 Cheese                          | 55.86<br>(7.68)   | 55.82<br>(7.72)   | 55.82<br>(7.72)   |
| expenditures food 2017 Ice cream and related products  | 21.92<br>(2.70)   | 21.90<br>(2.72)   | 21.90<br>(2.72)   |
| expenditures food 2017 Miscellaneous dairy products    | 24.16<br>(2.97)   | 24.15<br>(2.99)   | 24.15<br>(2.99)   |
| expenditures food 2017 Fruits and vegetables           | 314.92<br>(35.56) | 314.73<br>(35.72) | 314.73<br>(35.72) |
| expenditures food 2017 Fresh fruits                    | 116.71<br>(14.08) | 116.63<br>(14.15) | 116.63<br>(14.15) |
| expenditures food 2017 Apples                          | 17.09<br>(2.14)   | 17.07<br>(2.15)   | 17.07<br>(2.15)   |
| expenditures food 2017 Bananas                         | 17.49<br>(1.90)   | 17.48<br>(1.91)   | 17.48<br>(1.91)   |
| expenditures food 2017 Oranges                         | 12.24<br>(1.19)   | 12.24<br>(1.19)   | 12.24<br>(1.19)   |
| expenditures food 2017 Citrus fruits excluding oranges | 18.05<br>(2.25)   | 18.04<br>(2.26)   | 18.04<br>(2.26)   |
| expenditures food 2017 Other fresh fruits              | 51.75<br>(6.69)   | 51.71<br>(6.73)   | 51.71<br>(6.73)   |
| expenditures food 2017 Fresh vegetables                | 101.33<br>(12.13) | 101.26<br>(12.19) | 101.26<br>(12.19) |
| expenditures food 2017 Potatoes                        | 15.65<br>(1.43)   | 15.64<br>(1.43)   | 15.64<br>(1.43)   |
| expenditures food 2017 Lettuce                         | 13.51<br>(1.64)   | 13.50<br>(1.65)   | 13.50<br>(1.65)   |
| expenditures food 2017 Tomatoes                        | 17.53<br>(2.19)   | 17.52<br>(2.20)   | 17.52<br>(2.20)   |
| expenditures food 2017 Other fresh vegetables          | 54.55<br>(7.06)   | 54.51<br>(7.10)   | 54.51<br>(7.10)   |
| expenditures food 2017 Processed fruits                | 43.62<br>(4.26)   | 43.61<br>(4.27)   | 43.61<br>(4.27)   |
| expenditures food 2017 Frozen fruits and fruit juices  | 5.16 (0.69)       | 5.16 (0.70)       | 5.16 (0.70)       |
| expenditures food 2017 Canned fruits                   | 8.09 (0.90)       | 8.09 (0.91)       | 8.09 (0.91)       |
| expenditures food 2017 Dried fruit                     | 3.27 (0.47)       | 3.27 (0.48)       | 3.27 (0.48)       |
| expenditures food 2017 Fresh fruit juice               | 5.50 (0.57)       | 5.50 (0.57)       | 5.50 (0.57)       |
| expenditures food 2017 Canned and bottled fruit juice  | 21.73<br>(1.84)   | 21.72<br>(1.84)   | 21.72<br>(1.84)   |
| expenditures food 2017 Processed vegetables            | 53.23<br>(5.43)   | 53.21<br>(5.45)   | 53.21<br>(5.45)   |
| expenditures food 2017 Frozen vegetables               | 14.14<br>(1.45)   | 14.13<br>(1.46)   | 14.13<br>(1.46)   |

|                                                                 |                   |                   |                   |
|-----------------------------------------------------------------|-------------------|-------------------|-------------------|
| expenditures food 2017 Canned and dried vegetables and juices   | 39.09<br>(3.98)   | 39.07<br>(4.00)   | 39.07<br>(4.00)   |
| expenditures food 2017 Other food at home                       | 578.36<br>(66.98) | 577.99<br>(67.28) | 577.99<br>(67.28) |
| expenditures food 2017 Sugar and other sweets                   | 62.44<br>(8.37)   | 62.39<br>(8.41)   | 62.39<br>(8.41)   |
| expenditures food 2017 Candy and chewing gum                    | 41.69<br>(6.47)   | 41.65<br>(6.50)   | 41.65<br>(6.50)   |
| expenditures food 2017 Sugar                                    | 7.34 (0.64)       | 7.34 (0.64)       | 7.34 (0.64)       |
| expenditures food 2017 Artificial sweeteners                    | 1.72 (0.25)       | 1.72 (0.25)       | 1.72 (0.25)       |
| expenditures food 2017 Jams preserves other sweets              | 12.20<br>(1.56)   | 12.19<br>(1.57)   | 12.19<br>(1.57)   |
| expenditures food 2017 Fats and oils etc                        | 44.94<br>(4.59)   | 44.92<br>(4.60)   | 44.92<br>(4.60)   |
| expenditures food 2017 Margarine                                | 2.48 (0.29)       | 2.48 (0.29)       | 2.48 (0.29)       |
| expenditures food 2017 Fats and oils                            | 14.01<br>(1.18)   | 14.01<br>(1.18)   | 14.01<br>(1.18)   |
| expenditures food 2017 Salad dressings                          | 11.53<br>(1.22)   | 11.53<br>(1.22)   | 11.53<br>(1.22)   |
| expenditures food 2017 Nondairy cream and imitation milk        | 8.08 (0.97)       | 8.08 (0.97)       | 8.08 (0.97)       |
| expenditures food 2017 Peanut butter                            | 8.64 (1.09)       | 8.64 (1.09)       | 8.64 (1.09)       |
| expenditures food 2017 Miscellaneous foods                      | 299.28<br>(34.24) | 299.09<br>(34.40) | 299.09<br>(34.40) |
| expenditures food 2017 Frozen prepared foods                    | 53.30<br>(5.60)   | 53.27<br>(5.62)   | 53.27<br>(5.62)   |
| expenditures food 2017 Canned and packaged soups                | 18.04<br>(2.01)   | 18.03<br>(2.02)   | 18.03<br>(2.02)   |
| expenditures food 2017 Potato chips nuts and other snacks       | 70.10<br>(8.35)   | 70.05<br>(8.39)   | 70.05<br>(8.39)   |
| expenditures food 2017 Condiments and seasonings                | 57.32<br>(7.00)   | 57.28<br>(7.03)   | 57.28<br>(7.03)   |
| expenditures food 2017 Other canned and packaged prepared foods | 100.51<br>(11.43) | 100.44<br>(11.49) | 100.44<br>(11.49) |
| expenditures food 2017 Prepared salads                          | 16.41<br>(1.90)   | 16.40<br>(1.91)   | 16.40<br>(1.91)   |
| expenditures food 2017 Prepared desserts                        | 5.39 (0.64)       | 5.38 (0.64)       | 5.38 (0.64)       |
| expenditures food 2017 Baby food                                | 13.55<br>(1.64)   | 13.54<br>(1.66)   | 13.54<br>(1.66)   |
| expenditures food 2017 Nonalcoholic beverages                   | 151.41<br>(16.68) | 151.33<br>(16.75) | 151.33<br>(16.75) |
| expenditures food 2017 Cola                                     | 29.36<br>(3.50)   | 29.34<br>(3.51)   | 29.34<br>(3.51)   |
| expenditures food 2017 Other carbonated drinks                  | 28.38<br>(3.18)   | 28.36<br>(3.19)   | 28.36<br>(3.19)   |
| expenditures food 2017 Tea                                      | 12.65<br>(1.36)   | 12.64<br>(1.37)   | 12.64<br>(1.37)   |
| expenditures food 2017 Coffee                                   | 36.34<br>(5.11)   | 36.31<br>(5.14)   | 36.31<br>(5.14)   |

|                                                                                            |                     |                     |                     |
|--------------------------------------------------------------------------------------------|---------------------|---------------------|---------------------|
| expenditures food 2017 Noncarbonated fruit flavored drinks lemonade                        | 9.11 (0.91)         | 9.11 (0.91)         | 9.11 (0.91)         |
| expenditures food 2017 Bottled water                                                       | 23.74<br>(1.90)     | 23.74<br>(1.90)     | 23.74<br>(1.90)     |
| expenditures food 2017 Sports drinks                                                       | 6.86 (0.69)         | 6.86 (0.69)         | 6.86 (0.69)         |
| expenditures food 2017 Nonalcoholic beer                                                   | 0.08 (0.02)         | 0.08 (0.02)         | 0.08 (0.02)         |
| expenditures food 2017 Food prepared by consumer OOT trips                                 | 22.07<br>(3.64)     | 22.05<br>(3.66)     | 22.05<br>(3.66)     |
| expenditures food 2017 Food away from home                                                 | 1240.79<br>(168.64) | 1239.89<br>(169.40) | 1239.89<br>(169.40) |
| expenditures food 2017 Meals at restaurants carry outs and other                           | 1056.22<br>(137.20) | 1055.49<br>(137.83) | 1055.49<br>(137.83) |
| expenditures food 2017 Lunch                                                               | 330.46<br>(40.48)   | 330.25<br>(40.64)   | 330.25<br>(40.64)   |
| expenditures food 2017 Lunch at fastfood, delivery, concession, buffet or cafeteria        | 157.75<br>(16.19)   | 157.68<br>(16.24)   | 157.68<br>(16.24)   |
| expenditures food 2017 Lunch at Restaurant                                                 | 140.05<br>(20.21)   | 139.93<br>(20.31)   | 139.93<br>(20.31)   |
| expenditures food 2017 Lunch at Vending machine                                            | 5.42 (0.60)         | 5.42 (0.60)         | 5.42 (0.60)         |
| expenditures food 2017 Lunch at employer or school cafeteria                               | 27.30<br>(3.11)     | 27.29<br>(3.12)     | 27.29<br>(3.12)     |
| expenditures food 2017 Dinner                                                              | 510.84<br>(70.79)   | 510.45<br>(71.13)   | 510.45<br>(71.13)   |
| expenditures food 2017 Dinner at fastfood, delivery, concession, buffet or cafeteria       | 174.97<br>(16.36)   | 174.91<br>(16.41)   | 174.91<br>(16.41)   |
| expenditures food 2017 Dinner at Rest                                                      | 333.02<br>(53.92)   | 332.70<br>(54.21)   | 332.70<br>(54.21)   |
| expenditures food 2017 Dinner at Vending machine                                           | 1.64 (0.16)         | 1.64 (0.16)         | 1.64 (0.16)         |
| expenditures food 2017 Dinner at employer or school cafeteria                              | 2.30 (0.25)         | 2.30 (0.25)         | 2.30 (0.25)         |
| expenditures food 2017 Snack nonalcoholic beverages                                        | 92.42<br>(11.31)    | 92.36<br>(11.38)    | 92.36<br>(11.38)    |
| expenditures food 2017 Snack nonalcoholic beverages at Fast Food, Concession, Buffet, Cafe | 58.80<br>(7.65)     | 58.76<br>(7.69)     | 58.76<br>(7.69)     |
| expenditures food 2017 Snack nonalcoholic beverages at Restaurant                          | 20.58<br>(2.35)     | 20.56<br>(2.36)     | 20.56<br>(2.36)     |
| expenditures food 2017 Snack nonalcoholic beverages at Vending Machine                     | 8.89 (0.95)         | 8.88 (0.95)         | 8.88 (0.95)         |
| expenditures food 2017 Snack nonalcoholic beverages at Employee or School Cafe             | 4.19 (0.45)         | 4.19 (0.45)         | 4.19 (0.45)         |
| expenditures food 2017 Breakfast and brunch                                                | 122.44<br>(14.66)   | 122.37<br>(14.71)   | 122.37<br>(14.71)   |
| expenditures food 2017 Breakfast and brunch at Fast Food, Concession, Buffet, Cafe         | 66.08<br>(7.24)     | 66.04<br>(7.27)     | 66.04<br>(7.27)     |
| expenditures food 2017 Breakfast and brunch at Rest                                        | 48.20<br>(6.26)     | 48.16<br>(6.28)     | 48.16<br>(6.28)     |
| expenditures food 2017 Breakfast and brunch at Vending Machine                             | 3.09 (0.43)         | 3.09 (0.43)         | 3.09 (0.43)         |

|                                                                        |                    |                    |                    |
|------------------------------------------------------------------------|--------------------|--------------------|--------------------|
| expenditures food 2017 Breakfast and brunch at Employee or School Cafe | 5.19 (0.50)        | 5.18 (0.51)        | 5.18 (0.51)        |
| expenditures food 2017 Food or board at school                         | 12.40<br>(1.65)    | 12.39<br>(1.65)    | 12.39<br>(1.65)    |
| expenditures food 2017 Catered affairs                                 | 14.95<br>(3.13)    | 14.93<br>(3.15)    | 14.93<br>(3.15)    |
| expenditures food 2017 Food on out of town trips                       | 122.68<br>(22.70)  | 122.56<br>(22.79)  | 122.56<br>(22.79)  |
| expenditures food 2017 School lunches                                  | 25.25<br>(2.53)    | 25.24<br>(2.54)    | 25.24<br>(2.54)    |
| expenditures food 2017 Meals as pay                                    | 10.43<br>(1.39)    | 10.42<br>(1.39)    | 10.42<br>(1.39)    |
| expenditures food 2017 Alcoholic beverages                             | 209.70<br>(35.96)  | 209.49<br>(36.15)  | 209.49<br>(36.15)  |
| expenditures food 2017 Alcoholic beverages at home                     | 117.00<br>(18.54)  | 116.89<br>(18.63)  | 116.89<br>(18.63)  |
| expenditures food 2017 Beer and ale                                    | 49.58<br>(6.59)    | 49.54<br>(6.63)    | 49.54<br>(6.63)    |
| expenditures food 2017 Whiskey                                         | 4.84 (0.66)        | 4.84 (0.67)        | 4.84 (0.67)        |
| expenditures food 2017 Wine                                            | 53.36<br>(10.32)   | 53.30<br>(10.36)   | 53.30<br>(10.36)   |
| expenditures food 2017 Other alcoholic beverages                       | 9.61 (1.62)        | 9.60 (1.63)        | 9.60 (1.63)        |
| expenditures food 2017 Alcoholic beverages away from home              | 92.80<br>(17.50)   | 92.69<br>(17.60)   | 92.69<br>(17.60)   |
| expenditures food 2017 Beer and ale away                               | 30.90<br>(5.33)    | 30.86<br>(5.36)    | 30.86<br>(5.36)    |
| expenditures food 2017 Wine away                                       | 17.74<br>(3.79)    | 17.71<br>(3.81)    | 17.71<br>(3.81)    |
| expenditures food 2017 Other alcoholic beverages away                  | 19.91<br>(3.52)    | 19.89<br>(3.54)    | 19.89<br>(3.54)    |
| expenditures food 2017 Alcoholic beverages purchased on trips          | 24.05<br>(4.95)    | 24.03<br>(4.97)    | 24.03<br>(4.97)    |
| expenditures food 2017 Education                                       | 555.33<br>(104.62) | 554.87<br>(104.87) | 554.87<br>(104.87) |
| expenditures food 2017 College tuition                                 | 334.86<br>(66.99)  | 334.54<br>(67.16)  | 334.54<br>(67.16)  |
| expenditures food 2017 Elementary and high school tuition              | 79.48<br>(19.12)   | 79.39<br>(19.17)   | 79.39<br>(19.17)   |
| expenditures food 2017 Vocational and technical school tuition         | 2.59 (0.64)        | 2.59 (0.64)        | 2.59 (0.64)        |
| expenditures food 2017 Test preparation tutoring services              | 6.65 (1.88)        | 6.65 (1.88)        | 6.65 (1.88)        |
| expenditures food 2017 Other schools tuition                           | 3.38 (0.80)        | 3.38 (0.80)        | 3.38 (0.80)        |
| expenditures food 2017 Other school expenses including rentals         | 18.34<br>(3.14)    | 18.32<br>(3.16)    | 18.32<br>(3.16)    |
| expenditures food 2017 School supplies for college                     | 18.28<br>(2.01)    | 18.27<br>(2.01)    | 18.27<br>(2.01)    |
| expenditures food 2017 School supplies for elementary high school      | 6.80 (0.64)        | 6.80 (0.64)        | 6.80 (0.64)        |



|                                                                             |                       |                       |                       |
|-----------------------------------------------------------------------------|-----------------------|-----------------------|-----------------------|
| expenditures food 2017 School supplies for vocational and technical schools | 0.21 (0.04)           | 0.21 (0.04)           | 0.21 (0.04)           |
| expenditures food 2017 School supplies for day care nursery                 | 0.13 (0.02)           | 0.13 (0.02)           | 0.13 (0.02)           |
| expenditures home 2017 Total annual expenditures                            | 22727.77<br>(2912.64) | 22714.19<br>(2922.62) | 22714.19<br>(2922.62) |
| expenditures home 2017 Housing                                              | 7341.23<br>(835.34)   | 7337.90<br>(837.47)   | 7337.90<br>(837.47)   |
| expenditures home 2017 Shelter                                              | 4266.18<br>(498.29)   | 4264.29<br>(499.44)   | 4264.29<br>(499.44)   |
| expenditures home 2017 Owned dwellings                                      | 2674.20<br>(416.41)   | 2672.18<br>(418.02)   | 2672.18<br>(418.02)   |
| expenditures home 2017 Mortgage interest and charges                        | 1258.57<br>(208.39)   | 1257.70<br>(209.10)   | 1257.70<br>(209.10)   |
| expenditures home 2017 Mortgage interest                                    | 1204.80<br>(198.93)   | 1203.98<br>(199.59)   | 1203.98<br>(199.59)   |
| expenditures home 2017 Interest paid home equity loan                       | 15.30<br>(2.63)       | 15.29<br>(2.64)       | 15.29<br>(2.64)       |
| expenditures home 2017 Interest paid home equity line of credit             | 38.50<br>(7.43)       | 38.45<br>(7.47)       | 38.45<br>(7.47)       |
| expenditures home 2017 Property taxes                                       | 819.60<br>(130.29)    | 818.89<br>(130.85)    | 818.89<br>(130.85)    |
| expenditures home 2017 Main repairs in Other Owned                          | 598.37<br>(87.01)     | 597.94<br>(87.29)     | 597.94<br>(87.29)     |
| expenditures home 2017 Homeowners and related insurance                     | 174.47<br>(26.00)     | 174.33<br>(26.08)     | 174.33<br>(26.08)     |
| expenditures home 2017 Ground rent                                          | 24.04<br>(5.22)       | 24.02<br>(5.22)       | 24.02<br>(5.22)       |
| expenditures home 2017 Main repair services Owned                           | 300.43<br>(45.27)     | 300.22<br>(45.39)     | 300.22<br>(45.39)     |
| expenditures home 2017 Main repair commodities Owned                        | 37.51<br>(5.58)       | 37.48<br>(5.60)       | 37.48<br>(5.60)       |
| expenditures home 2017 Rented dwellings                                     | 1309.81<br>(233.02)   | 1310.04<br>(233.35)   | 1310.04<br>(233.35)   |
| expenditures home 2017 Rent                                                 | 1238.51<br>(222.40)   | 1238.74<br>(222.70)   | 1238.74<br>(222.70)   |
| expenditures home 2017 Rent as pay                                          | 32.20<br>(6.69)       | 32.22<br>(6.71)       | 32.22<br>(6.71)       |
| expenditures home 2017 Main insurance and Other Rented                      | 40.95<br>(7.08)       | 40.93<br>(7.08)       | 40.93<br>(7.08)       |
| expenditures home 2017 Tenants insurance                                    | 7.53 (1.14)           | 7.53 (1.14)           | 7.53 (1.14)           |
| expenditures home 2017 Other lodging                                        | 307.45<br>(65.32)     | 307.16<br>(65.48)     | 307.16<br>(65.48)     |
| expenditures home 2017 Owned vacation homes                                 | 108.75<br>(23.81)     | 108.65<br>(23.85)     | 108.65<br>(23.85)     |
| expenditures home 2017 Utilities fuels and public services                  | 1537.97<br>(143.76)   | 1537.60<br>(143.90)   | 1537.60<br>(143.90)   |
| expenditures home 2017 Natural gas                                          | 165.74<br>(15.19)     | 165.73<br>(15.18)     | 165.73<br>(15.18)     |

|                                                                                          |                   |                   |                   |
|------------------------------------------------------------------------------------------|-------------------|-------------------|-------------------|
| expenditures home 2017 Electricity                                                       | 572.73<br>(51.99) | 572.63<br>(52.01) | 572.63<br>(52.01) |
| expenditures home 2017 Fuel oil and Other fuels                                          | 47.67<br>(7.29)   | 47.63<br>(7.31)   | 47.63<br>(7.31)   |
| expenditures home 2017 Fuel oil                                                          | 25.47<br>(3.42)   | 25.45<br>(3.43)   | 25.45<br>(3.43)   |
| expenditures home 2017 Coal wood and Other fuels                                         | 3.53 (0.73)       | 3.53 (0.73)       | 3.53 (0.73)       |
| expenditures home 2017 Bottled gas                                                       | 18.69<br>(3.37)   | 18.67<br>(3.38)   | 18.67<br>(3.38)   |
| expenditures home 2017 Telephone services                                                | 536.89<br>(49.79) | 536.74<br>(49.87) | 536.74<br>(49.87) |
| expenditures home 2017 Cell phone service                                                | 411.19<br>(37.82) | 411.07<br>(37.89) | 411.07<br>(37.89) |
| expenditures home 2017 Water and Other public services                                   | 217.87<br>(22.20) | 217.79<br>(22.23) | 217.79<br>(22.23) |
| expenditures home 2017 household operations                                              | 556.43<br>(78.96) | 556.03<br>(79.27) | 556.03<br>(79.27) |
| expenditures home 2017 Personal services                                                 | 207.96<br>(28.80) | 207.81<br>(28.93) | 207.81<br>(28.93) |
| expenditures home 2017 Other household                                                   | 355.57<br>(52.56) | 355.32<br>(52.73) | 355.32<br>(52.73) |
| expenditures home 2017 Housekeeping services                                             | 65.05<br>(18.54)  | 64.96<br>(18.58)  | 64.96<br>(18.58)  |
| expenditures home 2017 Gardening lawn care service                                       | 53.26<br>(9.64)   | 53.21<br>(9.67)   | 53.21<br>(9.67)   |
| expenditures home 2017 Water softening service                                           | 2.99 (0.31)       | 2.99 (0.31)       | 2.99 (0.31)       |
| expenditures home 2017 household laundry dryclean not coin operated                      | 7.29 (1.49)       | 7.28 (1.49)       | 7.28 (1.49)       |
| expenditures home 2017 Coin operated household laundry dryclean                          | 3.74 (0.72)       | 3.75 (0.72)       | 3.75 (0.72)       |
| expenditures home 2017 Services for Termite pest control                                 | 8.24 (1.33)       | 8.23 (1.34)       | 8.23 (1.34)       |
| expenditures home 2017 Home security system service fee                                  | 11.69<br>(1.46)   | 11.69<br>(1.45)   | 11.69<br>(1.45)   |
| expenditures home 2017 Other home services                                               | 7.89 (1.48)       | 7.88 (1.49)       | 7.88 (1.49)       |
| expenditures home 2017 Termite pest control products                                     | 2.04 (0.33)       | 2.03 (0.33)       | 2.03 (0.33)       |
| expenditures home 2017 Moving storage freight                                            | 17.90<br>(2.93)   | 17.89<br>(2.94)   | 17.89<br>(2.94)   |
| expenditures home 2017 Appliance repair including service center                         | 6.42 (0.81)       | 6.41 (0.81)       | 6.41 (0.81)       |
| expenditures home 2017 Reupholstering furniture repair                                   | 1.94 (0.38)       | 1.93 (0.39)       | 1.93 (0.39)       |
| expenditures home 2017 Repairs rentals of law garden power equipment household equipment | 2.87 (0.45)       | 2.87 (0.46)       | 2.87 (0.46)       |
| expenditures home 2017 Computer information services Internet                            | 163.86<br>(16.62) | 163.79<br>(16.67) | 163.79<br>(16.67) |
| expenditures home 2017 Computer Installation                                             | 0.08 (0.02)       | 0.08 (0.02)       | 0.08 (0.02)       |
| expenditures home 2017 Housekeeping supplies                                             | 265.37<br>(32.09) | 265.20<br>(32.22) | 265.20<br>(32.22) |

|                                                             |                    |                    |                    |
|-------------------------------------------------------------|--------------------|--------------------|--------------------|
| expenditures home 2017 Laundry and cleaning supplies        | 62.17<br>(5.69)    | 62.15<br>(5.69)    | 62.15<br>(5.69)    |
| expenditures home 2017 Soaps and detergents                 | 33.59<br>(2.95)    | 33.58<br>(2.96)    | 33.58<br>(2.96)    |
| expenditures home 2017 Other laundry cleaning products      | 28.56<br>(2.76)    | 28.55<br>(2.76)    | 28.55<br>(2.76)    |
| expenditures home 2017 Other household products             | 150.51<br>(19.89)  | 150.39<br>(19.98)  | 150.39<br>(19.98)  |
| expenditures home 2017 Cleansing and TP towels napkins      | 47.76<br>(4.63)    | 47.74<br>(4.64)    | 47.74<br>(4.64)    |
| expenditures home 2017 misc household products              | 66.60<br>(9.52)    | 66.54<br>(9.57)    | 66.54<br>(9.57)    |
| expenditures home 2017 Lawn and garden supplies             | 36.84<br>(6.26)    | 36.80<br>(6.29)    | 36.80<br>(6.29)    |
| expenditures home 2017 Postage and stationery               | 53.43<br>(6.98)    | 53.39<br>(7.01)    | 53.39<br>(7.01)    |
| expenditures home 2017 Stationery supplies giftwrap         | 31.64<br>(4.72)    | 31.61<br>(4.75)    | 31.61<br>(4.75)    |
| expenditures home 2017 Postage                              | 20.18<br>(2.23)    | 20.17<br>(2.23)    | 20.17<br>(2.23)    |
| expenditures home 2017 Delivery services                    | 1.71 (0.28)        | 1.71 (0.28)        | 1.71 (0.28)        |
| expenditures home 2017 household furnishings and equipmentt | 735.13<br>(101.29) | 734.66<br>(101.63) | 734.66<br>(101.63) |
| expenditures home 2017 household textiles                   | 45.82<br>(4.66)    | 45.82<br>(4.66)    | 45.82<br>(4.66)    |
| expenditures home 2017 Bathroom linens                      | 10.13<br>(0.95)    | 10.13<br>(0.95)    | 10.13<br>(0.95)    |
| expenditures home 2017 Bedroom linens                       | 24.77<br>(2.46)    | 24.77<br>(2.46)    | 24.77<br>(2.46)    |
| expenditures home 2017 Curtains and draperies               | 5.05 (0.75)        | 5.05 (0.75)        | 5.05 (0.75)        |
| expenditures home 2017 Slipcovers decorative pillows        | 1.74 (0.22)        | 1.74 (0.22)        | 1.74 (0.22)        |
| expenditures home 2017 Furniture                            | 200.95<br>(28.06)  | 200.86<br>(28.10)  | 200.86<br>(28.10)  |
| expenditures home 2017 Mattress and springs                 | 39.65<br>(5.78)    | 39.62<br>(5.80)    | 39.62<br>(5.80)    |
| expenditures home 2017 Other bedroom furniture              | 34.60<br>(3.59)    | 34.59<br>(3.60)    | 34.59<br>(3.60)    |
| expenditures home 2017 Sofas                                | 56.31<br>(7.90)    | 56.29<br>(7.90)    | 56.29<br>(7.90)    |
| expenditures home 2017 Living room chairs                   | 19.93<br>(2.78)    | 19.92<br>(2.79)    | 19.92<br>(2.79)    |
| expenditures home 2017 Living room tables                   | 4.30 (0.79)        | 4.30 (0.79)        | 4.30 (0.79)        |
| expenditures home 2017 Kitchen dining room furniture        | 16.75<br>(2.88)    | 16.75<br>(2.88)    | 16.75<br>(2.88)    |
| expenditures home 2017 Infants furniture                    | 3.45 (0.34)        | 3.45 (0.34)        | 3.45 (0.34)        |
| expenditures home 2017 Outdoor furniture                    | 10.56<br>(2.12)    | 10.55<br>(2.13)    | 10.55<br>(2.13)    |

|                                                                           |                   |                   |                   |
|---------------------------------------------------------------------------|-------------------|-------------------|-------------------|
| expenditures home 2017 Wall units cabinets and Other occasional furniture | 15.41<br>(1.99)   | 15.41<br>(1.98)   | 15.41<br>(1.98)   |
| expenditures home 2017 Floor coverings                                    | 7.30 (1.03)       | 7.29 (1.03)       | 7.29 (1.03)       |
| expenditures home 2017 Major appliances                                   | 110.54<br>(14.00) | 110.47<br>(14.06) | 110.47<br>(14.06) |
| expenditures home 2017 Electric floor cleaning equipment                  | 7.42 (1.03)       | 7.42 (1.03)       | 7.42 (1.03)       |
| expenditures home 2017 Sewing machines                                    | 2.43 (0.54)       | 2.43 (0.54)       | 2.43 (0.54)       |
| expenditures home 2017 Small appliances and Misc housewares               | 48.57<br>(6.96)   | 48.52<br>(7.00)   | 48.52<br>(7.00)   |
| expenditures home 2017 Housewares                                         | 33.14<br>(5.13)   | 33.10<br>(5.16)   | 33.10<br>(5.16)   |
| expenditures home 2017 Flatware                                           | 1.79 (0.30)       | 1.79 (0.30)       | 1.79 (0.30)       |
| expenditures home 2017 Nonelectric cookware                               | 9.32 (1.53)       | 9.31 (1.54)       | 9.31 (1.54)       |
| expenditures home 2017 Tableware nonelectric kitchenware                  | 9.98 (1.58)       | 9.97 (1.59)       | 9.97 (1.59)       |
| expenditures home 2017 Small appliances                                   | 15.37<br>(1.86)   | 15.36<br>(1.87)   | 15.36<br>(1.87)   |
| expenditures home 2017 Small electric kitchen appliances                  | 11.73<br>(1.39)   | 11.73<br>(1.39)   | 11.73<br>(1.39)   |
| expenditures home 2017 Portable heating and cooling equipment             | 3.64 (0.54)       | 3.64 (0.54)       | 3.64 (0.54)       |
| expenditures home 2017 misc household equipment                           | 323.28<br>(48.70) | 323.03<br>(48.90) | 323.03<br>(48.90) |
| expenditures home 2017 Window coverings                                   | 7.11 (1.68)       | 7.10 (1.68)       | 7.10 (1.68)       |
| expenditures home 2017 nfants equipment                                   | 11.83<br>(1.16)   | 11.82<br>(1.17)   | 11.82<br>(1.17)   |
| expenditures home 2017 Laundry and cleaning equipment                     | 9.02 (1.14)       | 9.01 (1.15)       | 9.01 (1.15)       |
| expenditures home 2017 Outdoor equipment                                  | 8.78 (1.92)       | 8.77 (1.93)       | 8.77 (1.93)       |
| expenditures home 2017 Clocks and decorative items                        | 56.70<br>(10.82)  | 56.64<br>(10.87)  | 56.64<br>(10.87)  |
| expenditures home 2017 Telephones and accessories                         | 20.53<br>(3.66)   | 20.53<br>(3.66)   | 20.53<br>(3.66)   |
| expenditures home 2017 Lawn and garden equipment                          | 23.16<br>(2.58)   | 23.16<br>(2.57)   | 23.16<br>(2.57)   |
| expenditures home 2017 Power tools                                        | 13.96<br>(2.22)   | 13.95<br>(2.23)   | 13.95<br>(2.23)   |
| expenditures home 2017 Office furniture home use                          | 2.76 (0.76)       | 2.76 (0.76)       | 2.76 (0.76)       |
| expenditures home 2017Hand tools                                          | 6.07 (0.91)       | 6.06 (0.92)       | 6.06 (0.92)       |
| expenditures home 2017 Indoor plants fresh flowers                        | 19.76<br>(3.39)   | 19.74<br>(3.41)   | 19.74<br>(3.41)   |
| expenditures home 2017 Closet and storage items                           | 7.98 (1.39)       | 7.98 (1.40)       | 7.98 (1.40)       |
| expenditures home 2017 Rental of furniture                                | 1.96 (0.31)       | 1.96 (0.31)       | 1.96 (0.31)       |
| expenditures home 2017 Luggage                                            | 5.95 (0.65)       | 5.95 (0.66)       | 5.95 (0.66)       |
| expenditures home 2017 Computer hardware for non business                 | 54.46<br>(7.75)   | 54.42<br>(7.79)   | 54.42<br>(7.79)   |
| expenditures home 2017 Portable memory                                    | 1.94 (0.25)       | 1.94 (0.25)       | 1.94 (0.25)       |

|                                                         |                    |                    |                    |
|---------------------------------------------------------|--------------------|--------------------|--------------------|
| expenditures home 2017 Computer software                | 9.74 (1.65)        | 9.73 (1.66)        | 9.73 (1.66)        |
| expenditures home 2017 Computer accessories             | 13.72<br>(1.50)    | 13.72<br>(1.50)    | 13.72<br>(1.50)    |
| expenditures home 2017 Internet services away from home | 2.48 (0.28)        | 2.47 (0.28)        | 2.47 (0.28)        |
| expenditures home 2017 Business equipment home use      | 1.67 (0.25)        | 1.67 (0.25)        | 1.67 (0.25)        |
| expenditures home 2017 Other hardware                   | 8.06 (1.63)        | 8.05 (1.64)        | 8.05 (1.64)        |
| expenditures home 2017 Misc household equipment parts   | 18.46<br>(2.57)    | 18.44<br>(2.58)    | 18.44<br>(2.58)    |
| expenditures home 2017 Apparel and services             | 750.58<br>(105.06) | 750.17<br>(105.28) | 750.17<br>(105.28) |
| expenditures home 2017 Men and Boys clothing            | 174.68<br>(19.94)  | 174.61<br>(19.98)  | 174.61<br>(19.98)  |
| expenditures home 2017 Men 16 and over clothing         | 134.98<br>(17.63)  | 134.92<br>(17.67)  | 134.92<br>(17.67)  |
| expenditures home 2017 Mens suits                       | 9.97 (2.32)        | 9.97 (2.32)        | 9.97 (2.32)        |
| expenditures home 2017 Mens sportcoats tailored jackets | 3.15 (0.79)        | 3.15 (0.79)        | 3.15 (0.79)        |
| expenditures home 2017 Mens coats and jackets           | 10.16<br>(1.13)    | 10.15<br>(1.14)    | 10.15<br>(1.14)    |
| expenditures home 2017 Mens underwear                   | 13.18<br>(1.54)    | 13.17<br>(1.54)    | 13.17<br>(1.54)    |
| expenditures home 2017 Mens hosiery                     | 7.01 (0.75)        | 7.01 (0.75)        | 7.01 (0.75)        |
| expenditures home 2017 Mens nightwear                   | 0.81 (0.11)        | 0.81 (0.11)        | 0.81 (0.11)        |
| expenditures home 2017 Mens accessories                 | 12.67<br>(1.41)    | 12.66<br>(1.41)    | 12.66<br>(1.41)    |
| expenditures home 2017 Mens active sportswear           | 10.85<br>(1.66)    | 10.84<br>(1.67)    | 10.84<br>(1.67)    |
| expenditures home 2017 Mens pants and shorts            | 31.54<br>(3.36)    | 31.53<br>(3.37)    | 31.53<br>(3.37)    |
| expenditures home 2017 Mens uniforms                    | 1.20 (0.17)        | 1.20 (0.17)        | 1.20 (0.17)        |
| expenditures home 2017 Mens costumes                    | 0.49 (0.08)        | 0.49 (0.08)        | 0.49 (0.08)        |
| expenditures home 2017 Boys 2-15 clothing               | 41.96<br>(2.95)    | 41.96<br>(2.95)    | 41.96<br>(2.95)    |
| expenditures home 2017 Boys coats and jackets           | 2.59 (0.23)        | 2.59 (0.23)        | 2.59 (0.23)        |
| expenditures home 2017 Boys underwear                   | 5.15 (0.52)        | 5.15 (0.52)        | 5.15 (0.52)        |
| expenditures home 2017 Boys nightwear                   | 0.42 (0.05)        | 0.42 (0.05)        | 0.42 (0.05)        |
| expenditures home 2017 Boys hosiery                     | 2.46 (0.17)        | 2.46 (0.17)        | 2.46 (0.17)        |
| expenditures home 2017 Boys accessories                 | 2.64 (0.35)        | 2.64 (0.35)        | 2.64 (0.35)        |
| expenditures home 2017 Boys suits sportcoats vests      | 0.46 (0.06)        | 0.46 (0.06)        | 0.46 (0.06)        |
| expenditures home 2017 Boys pants and shorts            | 10.56<br>(0.77)    | 10.56<br>(0.77)    | 10.56<br>(0.77)    |
| expenditures home 2017 Boys costumes                    | 0.43 (0.05)        | 0.43 (0.05)        | 0.43 (0.05)        |
| expenditures home 2017 Women and girls clothing         | 284.46<br>(37.53)  | 284.29<br>(37.66)  | 284.29<br>(37.66)  |
| expenditures home 2017 Women 16 and over clothing       | 241.93<br>(32.70)  | 241.77<br>(32.80)  | 241.77<br>(32.80)  |

|                                                           |                   |                   |                   |
|-----------------------------------------------------------|-------------------|-------------------|-------------------|
| expenditures home 2017 Womens coats and jackets           | 13.14<br>(1.32)   | 13.13<br>(1.32)   | 13.13<br>(1.32)   |
| expenditures home 2017 Womens dresses                     | 29.62<br>(2.93)   | 29.62<br>(2.93)   | 29.62<br>(2.93)   |
| expenditures home 2017 Womens sportcoats tailored jackets | 3.40 (1.19)       | 3.40 (1.19)       | 3.40 (1.19)       |
| expenditures home 2017 Womens skirts                      | 4.73 (0.75)       | 4.73 (0.75)       | 4.73 (0.75)       |
| expenditures home 2017 Womens pants and shorts            | 34.10<br>(4.51)   | 34.07<br>(4.53)   | 34.07<br>(4.53)   |
| expenditures home 2017 Womens active sportswear           | 17.68<br>(2.62)   | 17.67<br>(2.63)   | 17.67<br>(2.63)   |
| expenditures home 2017 Womens sleepwear                   | 9.04 (1.07)       | 9.03 (1.08)       | 9.03 (1.08)       |
| expenditures home 2017 Womens undergarments               | 14.14<br>(1.53)   | 14.14<br>(1.53)   | 14.14<br>(1.53)   |
| expenditures home 2017 Womens hosiery                     | 8.77 (1.00)       | 8.77 (1.00)       | 8.77 (1.00)       |
| expenditures home 2017 Womens suits                       | 2.24 (0.26)       | 2.24 (0.26)       | 2.24 (0.26)       |
| expenditures home 2017 Womens accessories                 | 35.18<br>(7.78)   | 35.14<br>(7.80)   | 35.14<br>(7.80)   |
| expenditures home 2017 Womens uniforms                    | 2.18 (0.22)       | 2.18 (0.22)       | 2.18 (0.22)       |
| expenditures home 2017 Womens costumes                    | 0.59 (0.12)       | 0.59 (0.12)       | 0.59 (0.12)       |
| expenditures home 2017 Girls 2-15 clothing                | 44.96<br>(4.52)   | 44.94<br>(4.53)   | 44.94<br>(4.53)   |
| expenditures home 2017 Girls coats and jackets            | 2.16 (0.17)       | 2.16 (0.17)       | 2.16 (0.17)       |
| expenditures home 2017 Girls dresses and suits            | 5.83 (0.90)       | 5.83 (0.90)       | 5.83 (0.90)       |
| expenditures home 2017 Girls skirt pant short             | 9.84 (0.76)       | 9.84 (0.76)       | 9.84 (0.76)       |
| expenditures home 2017 Girls active sportswear            | 5.20 (0.77)       | 5.20 (0.78)       | 5.20 (0.78)       |
| expenditures home 2017 Girls underwear and sleepwear      | 3.88 (0.34)       | 3.88 (0.34)       | 3.88 (0.34)       |
| expenditures home 2017 Girls hosiery                      | 1.73 (0.14)       | 1.73 (0.14)       | 1.73 (0.14)       |
| expenditures home 2017 Girls accessories                  | 2.01 (0.35)       | 2.01 (0.35)       | 2.01 (0.35)       |
| expenditures home 2017 Girls uniforms                     | 1.01 (0.10)       | 1.01 (0.10)       | 1.01 (0.10)       |
| expenditures home 2017 Girls costumes                     | 1.08 (0.17)       | 1.08 (0.17)       | 1.08 (0.17)       |
| expenditures home 2017 Children under 2 clothing          | 35.61<br>(4.01)   | 35.59<br>(4.03)   | 35.59<br>(4.03)   |
| expenditures home 2017 Infant coat jacket snowsuit        | 0.42 (0.04)       | 0.42 (0.04)       | 0.42 (0.04)       |
| expenditures home 2017 Infant dresses outerwear           | 10.60<br>(1.83)   | 10.59<br>(1.84)   | 10.59<br>(1.84)   |
| expenditures home 2017 Infant underwear                   | 15.74<br>(1.17)   | 15.74<br>(1.17)   | 15.74<br>(1.17)   |
| expenditures home 2017 Infant nightwear loungewear        | 2.70 (0.18)       | 2.70 (0.18)       | 2.70 (0.18)       |
| expenditures home 2017 Infant accessories                 | 6.36 (1.27)       | 6.35 (1.27)       | 6.35 (1.27)       |
| expenditures home 2017 Footwear                           | 145.54<br>(16.34) | 145.50<br>(16.36) | 145.50<br>(16.36) |
| expenditures home 2017 Mens footwear                      | 46.94<br>(5.14)   | 46.92<br>(5.16)   | 46.92<br>(5.16)   |

|                                                                                   |                   |                   |                   |
|-----------------------------------------------------------------------------------|-------------------|-------------------|-------------------|
| expenditures home 2017 Boys footwear                                              | 20.98<br>(2.22)   | 21.00<br>(2.23)   | 21.00<br>(2.23)   |
| expenditures home 2017 Womens footwear                                            | 63.39<br>(9.45)   | 63.35<br>(9.48)   | 63.35<br>(9.48)   |
| expenditures home 2017 Girls footwear                                             | 16.14<br>(1.51)   | 16.15<br>(1.51)   | 16.15<br>(1.51)   |
| expenditures home 2017 Other apparel products and services                        | 114.14<br>(27.95) | 114.05<br>(27.95) | 114.05<br>(27.95) |
| expenditures home 2017 Audio and visual equipment and services                    | 422.06<br>(40.84) | 421.94<br>(40.90) | 421.94<br>(40.90) |
| expenditures home 2017 Televisions                                                | 38.10<br>(4.24)   | 38.09<br>(4.25)   | 38.09<br>(4.25)   |
| expenditures home 2017 Cable and satellite television services                    | 293.68<br>(27.53) | 293.63<br>(27.54) | 293.63<br>(27.54) |
| expenditures home 2017 Satellite radio service                                    | 6.16 (0.80)       | 6.15 (0.81)       | 6.15 (0.81)       |
| expenditures home 2017 Sound equipment accessories                                | 3.23 (0.44)       | 3.23 (0.44)       | 3.23 (0.44)       |
| expenditures home 2017 Online gaming services                                     | 1.41 (0.21)       | 1.41 (0.21)       | 1.41 (0.21)       |
| expenditures home 2017 VCRs and video disc players                                | 1.53 (0.13)       | 1.53 (0.13)       | 1.53 (0.13)       |
| expenditures home 2017 Video cassettes tapes and discs                            | 9.59 (0.99)       | 9.59 (0.99)       | 9.59 (0.99)       |
| expenditures home 2017 Video game software                                        | 4.72 (0.41)       | 4.72 (0.41)       | 4.72 (0.41)       |
| expenditures home 2017 Video game hardware and accessories                        | 19.84<br>(2.65)   | 19.82<br>(2.67)   | 19.82<br>(2.67)   |
| expenditures home 2017 Streaming downloading video                                | 9.05 (1.14)       | 9.05 (1.15)       | 9.05 (1.15)       |
| expenditures miscellaneous 2017 Applications games ringtones for handheld devices | 1.26 (0.13)       | 1.26 (0.13)       | 1.26 (0.13)       |
| expenditures miscellaneous 2017 Repair of tv radio and sound equipmentt           | 0.54 (0.05)       | 0.54 (0.05)       | 0.54 (0.05)       |
| expenditures miscellaneous 2017 Rental of televisions                             | 0.21 (0.17)       | 0.21 (0.17)       | 0.21 (0.17)       |
| expenditures miscellaneous 2017 Personal digital audio players                    | 0.75 (0.12)       | 0.75 (0.12)       | 0.75 (0.12)       |
| expenditures miscellaneous 2017 Satellite dishes                                  | 0.47 (0.14)       | 0.47 (0.14)       | 0.47 (0.14)       |
| expenditures miscellaneous 2017 CDs records audio tapes                           | 2.88 (0.40)       | 2.87 (0.40)       | 2.87 (0.40)       |
| expenditures miscellaneous 2017 Streaming downloading audio                       | 1.88 (0.33)       | 1.87 (0.33)       | 1.87 (0.33)       |
| expenditures miscellaneous 2017 Musical instruments and accessories               | 9.12 (1.54)       | 9.11 (1.55)       | 9.11 (1.55)       |
| expenditures miscellaneous 2017 Rental and repair of musical instruments          | 0.93 (0.20)       | 0.92 (0.20)       | 0.92 (0.20)       |
| expenditures miscellaneous 2017 Rental of video cassettes tapes films and discs   | 9.26 (0.97)       | 9.25 (0.98)       | 9.25 (0.98)       |
| expenditures miscellaneous 2017 Live entertainment for catered affairs            | 4.10 (0.86)       | 4.09 (0.86)       | 4.09 (0.86)       |
| expenditures miscellaneous 2017 Rental of party supplies for catered affairs      | 5.02 (1.37)       | 5.02 (1.37)       | 5.02 (1.37)       |
| expenditures miscellaneous 2017 Automobile ser clubs and GPS sers                 | 10.50<br>(1.22)   | 10.50<br>(1.22)   | 10.50<br>(1.22)   |

|                                                                                 |                       |                       |                       |
|---------------------------------------------------------------------------------|-----------------------|-----------------------|-----------------------|
| expenditures miscellaneous 2017 Cash downpayment car trucklease                 | 9.50 (1.12)           | 9.50 (1.13)           | 9.50 (1.13)           |
| expenditures miscellaneous 2017 Extra fees for car trucklease                   | 0.51 (0.17)           | 0.51 (0.17)           | 0.51 (0.17)           |
| expenditures miscellaneous 2017 car trucklease payments                         | 104.91<br>(15.92)     | 104.85<br>(15.94)     | 104.85<br>(15.94)     |
| expenditures miscellaneous 2017 Auto.truck rental                               | 17.39<br>(2.63)       | 17.38<br>(2.63)       | 17.38<br>(2.63)       |
| expenditures miscellaneous 2017 Auto.truck rental out of tow                    | 9.15 (1.68)           | 9.15 (1.68)           | 9.15 (1.68)           |
| expenditures miscellaneous 2017 Termination fee for car trucklease              | 0.16 (0.03)           | 0.16 (0.03)           | 0.16 (0.03)           |
| expenditures miscellaneous 2017 Trade in allowance for car trucklease           | 15.76<br>(1.87)       | 15.75<br>(1.88)       | 15.75<br>(1.88)       |
| expenditures miscellaneous 2017 Finance late interest charges for credit cards  | 111.11<br>(11.36)     | 111.07<br>(11.39)     | 111.07<br>(11.39)     |
| expenditures miscellaneous 2017 Finance late interest charges for other loans   | 17.09<br>(2.17)       | 17.07<br>(2.18)       | 17.07<br>(2.18)       |
| expenditures miscellaneous 2017 Finance late interest charges for student loans | 60.62<br>(7.69)       | 60.63<br>(7.68)       | 60.63<br>(7.68)       |
| expenditures miscellaneous 2017 Gas tank repair replacement                     | 5.26 (1.17)           | 5.25 (1.17)           | 5.25 (1.17)           |
| expenditures miscellaneous 2017 Fee for ser health plan BCBS                    | 219.91<br>(33.43)     | 219.70<br>(33.62)     | 219.70<br>(33.62)     |
| expenditures miscellaneous 2017 Fee for ser health plan not BCBS                | 235.79<br>(33.50)     | 235.61<br>(33.66)     | 235.61<br>(33.66)     |
| expenditures miscellaneous 2017 Health maintenance organization BCBS            | 167.05<br>(18.59)     | 166.98<br>(18.64)     | 166.98<br>(18.64)     |
| expenditures miscellaneous 2017 Health maintenance organization not BCBS        | 251.79<br>(28.74)     | 251.66<br>(28.85)     | 251.66<br>(28.85)     |
| expenditures miscellaneous 2017 Magazines                                       | 0.01 (0.00)           | 0.01 (0.00)           | 0.01 (0.00)           |
| expenditures miscellaneous 2017 material supp sew needlework                    | 8.97 (1.65)           | 8.96 (1.66)           | 8.96 (1.66)           |
| expenditures miscellaneous 2017 Movies parks museums                            | 25.37<br>(3.84)       | 25.35<br>(3.86)       | 25.35<br>(3.86)       |
| expenditures miscellaneous 2017 Newspapers                                      | 0.02 (0.00)           | 0.02 (0.00)           | 0.02 (0.00)           |
| expenditures miscellaneous 2017 Play theater opera concert                      | 19.35<br>(4.45)       | 19.33<br>(4.47)       | 19.33<br>(4.47)       |
| expenditures miscellaneous 2017 Value of savings checking money market and CDs  | 5197.20<br>(933.94)   | 5191.14<br>(938.97)   | 5191.14<br>(938.97)   |
| expenditures miscellaneous 2017 Value .surrender. of whole life insur policy    | 3189.04<br>(808.50)   | 3185.84<br>(809.28)   | 3185.84<br>(809.28)   |
| expenditures miscellaneous 2017 Value of other financial assets                 | 1815.99<br>(465.14)   | 1813.32<br>(466.86)   | 1813.32<br>(466.86)   |
| expenditures miscellaneous 2017 Value of retirement plan                        | 29504.94<br>(5747.93) | 29471.23<br>(5774.60) | 29471.23<br>(5774.60) |
| expenditures miscellaneous 2017 Value of stocks bonds mutual funds              | 6201.44<br>(1546.75)  | 6192.90<br>(1551.84)  | 6192.90<br>(1551.84)  |



|                                                                            |                       |                       |                       |
|----------------------------------------------------------------------------|-----------------------|-----------------------|-----------------------|
| expenditures miscellaneous 2017 Vehicle or engine repairs                  | 76.62<br>(9.61)       | 76.56<br>(9.65)       | 76.56<br>(9.65)       |
| expenditures miscellaneous 2017 Total annual expenditures                  | 22727.77<br>(2912.64) | 22714.19<br>(2922.62) | 22714.19<br>(2922.62) |
| expenditures miscellaneous 2017 Care for elderly invalids handicapped etc  | 12.30<br>(2.53)       | 12.28<br>(2.54)       | 12.28<br>(2.54)       |
| expenditures miscellaneous 2017 Day care centers nursery and preschools    | 144.11<br>(19.55)     | 144.02<br>(19.62)     | 144.02<br>(19.62)     |
| expenditures miscellaneous 2017 Watches                                    | 26.51<br>(8.83)       | 26.49<br>(8.83)       | 26.49<br>(8.83)       |
| expenditures miscellaneous 2017 Jewelry                                    | 31.45<br>(7.19)       | 31.42<br>(7.21)       | 31.42<br>(7.21)       |
| expenditures miscellaneous 2017 Shoe repair and other shoe service         | 0.65 (0.11)           | 0.65 (0.11)           | 0.65 (0.11)           |
| expenditures miscellaneous 2017 Coin operated apparel laundry dryclean     | 14.11<br>(2.75)       | 14.12<br>(2.75)       | 14.12<br>(2.75)       |
| expenditures miscellaneous 2017 Alteration repair tailor apparel access    | 2.58 (0.43)           | 2.58 (0.43)           | 2.58 (0.43)           |
| expenditures miscellaneous 2017 Clothing rental                            | 0.83 (0.17)           | 0.83 (0.17)           | 0.83 (0.17)           |
| expenditures miscellaneous 2017 Watch and jewelry repair                   | 11.68<br>(4.85)       | 11.66<br>(4.85)       | 11.66<br>(4.85)       |
| expenditures miscellaneous 2017 Apparel laundry dryclean not coin.operated | 17.92<br>(4.15)       | 17.91<br>(4.14)       | 17.91<br>(4.14)       |
| expenditures miscellaneous 2017 Transportation                             | 3867.00<br>(448.77)   | 3865.05<br>(450.21)   | 3865.05<br>(450.21)   |
| expenditures miscellaneous 2017 Vehicle purchases net outlay               | 1645.74<br>(196.15)   | 1644.88<br>(196.82)   | 1644.88<br>(196.82)   |
| expenditures miscellaneous 2017 Cars and trucks new                        | 817.58<br>(119.02)    | 816.95<br>(119.54)    | 816.95<br>(119.54)    |
| expenditures miscellaneous 2017 New cars                                   | 302.29<br>(36.18)     | 302.16<br>(36.26)     | 302.16<br>(36.26)     |
| expenditures miscellaneous 2017 New trucks                                 | 517.75<br>(84.83)     | 517.24<br>(85.29)     | 517.24<br>(85.29)     |
| expenditures miscellaneous 2017 Cars and trucks used                       | 804.30<br>(73.42)     | 804.11<br>(73.54)     | 804.11<br>(73.54)     |
| expenditures miscellaneous 2017 Used cars                                  | 346.58<br>(31.91)     | 346.62<br>(31.88)     | 346.62<br>(31.88)     |
| expenditures miscellaneous 2017 Used trucks                                | 455.83<br>(49.02)     | 455.59<br>(49.24)     | 455.59<br>(49.24)     |
| expenditures miscellaneous 2017 other vehicles                             | 23.91<br>(3.91)       | 23.88<br>(3.93)       | 23.88<br>(3.93)       |
| expenditures miscellaneous 2017 New motorcycles                            | 12.86<br>(2.54)       | 12.84<br>(2.56)       | 12.84<br>(2.56)       |
| expenditures miscellaneous 2017 Used motorcycles                           | 11.00<br>(1.42)       | 10.99<br>(1.43)       | 10.99<br>(1.43)       |
| expenditures miscellaneous 2017 Gasoline and motor oil                     | 844.40<br>(86.51)     | 844.03<br>(86.78)     | 844.03<br>(86.78)     |
| expenditures miscellaneous 2017 other vehicle expenses                     | 1115.26<br>(120.79)   | 1114.76<br>(121.13)   | 1114.76<br>(121.13)   |

|                                                                                   |                   |                   |                   |
|-----------------------------------------------------------------------------------|-------------------|-------------------|-------------------|
| expenditures miscellaneous 2017 Vehicle finance charges                           | 87.57<br>(8.99)   | 87.55<br>(9.01)   | 87.55<br>(9.01)   |
| expenditures miscellaneous 2017 Maintenance and repairs                           | 338.94<br>(39.24) | 338.75<br>(39.39) | 338.75<br>(39.39) |
| expenditures miscellaneous 2017 Coolant brake fluid transmission and OT additives | 2.88 (0.24)       | 2.88 (0.24)       | 2.88 (0.24)       |
| expenditures miscellaneous 2017 Tires purchased replaced installed                | 52.25<br>(6.60)   | 52.22<br>(6.63)   | 52.22<br>(6.63)   |
| expenditures miscellaneous 2017 Parts equipment and accessories                   | 20.38<br>(2.76)   | 20.36<br>(2.77)   | 20.36<br>(2.77)   |
| expenditures miscellaneous 2017 Vehicle products and cleaning services            | 5.61 (0.77)       | 5.61 (0.77)       | 5.61 (0.77)       |
| expenditures miscellaneous 2017 Misc. auto repair servicing                       | 39.96<br>(4.69)   | 39.94<br>(4.70)   | 39.94<br>(4.70)   |
| expenditures miscellaneous 2017 Body work and painting                            | 12.65<br>(1.75)   | 12.64<br>(1.76)   | 12.64<br>(1.76)   |
| expenditures miscellaneous 2017 Motor tune.up                                     | 16.53<br>(1.98)   | 16.52<br>(1.99)   | 16.52<br>(1.99)   |
| expenditures miscellaneous 2017 Lube oil change and oil filters                   | 35.30<br>(3.53)   | 35.29<br>(3.53)   | 35.29<br>(3.53)   |
| expenditures miscellaneous 2017 Front.end alignment wheel balance and rotation    | 10.30<br>(1.08)   | 10.30<br>(1.08)   | 10.30<br>(1.08)   |
| expenditures miscellaneous 2017 Shock absorber replacement                        | 5.05 (0.58)       | 5.05 (0.58)       | 5.05 (0.58)       |
| expenditures miscellaneous 2017 Repair tires and OT repair work                   | 42.58<br>(4.32)   | 42.57<br>(4.32)   | 42.57<br>(4.32)   |
| expenditures miscellaneous 2017 Auto repair ser policy                            | 13.94<br>(1.61)   | 13.93<br>(1.61)   | 13.93<br>(1.61)   |
| expenditures miscellaneous 2017 Vehicle insurance                                 | 433.67<br>(42.18) | 433.54<br>(42.24) | 433.54<br>(42.24) |
| expenditures miscellaneous 2017 Vehicle rental leases licenses and OT charges     | 257.02<br>(36.16) | 256.86<br>(36.26) | 256.86<br>(36.26) |
| expenditures miscellaneous 2017 Leased and rented vehicles                        | 157.78<br>(22.40) | 157.69<br>(22.45) | 157.69<br>(22.45) |
| expenditures miscellaneous 2017 Rented vehicles                                   | 26.98<br>(4.36)   | 26.97<br>(4.36)   | 26.97<br>(4.36)   |
| expenditures miscellaneous 2017 Leased vehicles                                   | 130.86<br>(18.08) | 130.79<br>(18.12) | 130.79<br>(18.12) |
| expenditures miscellaneous 2017 Vehicle registration state                        | 38.44<br>(5.08)   | 38.41<br>(5.10)   | 38.41<br>(5.10)   |
| expenditures miscellaneous 2017 Vehicle registration local                        | 3.78 (0.66)       | 3.77 (0.66)       | 3.77 (0.66)       |
| expenditures miscellaneous 2017 drivers license                                   | 3.49 (0.31)       | 3.49 (0.31)       | 3.49 (0.31)       |
| expenditures miscellaneous 2017 Vehicle inspection                                | 5.04 (0.59)       | 5.03 (0.59)       | 5.03 (0.59)       |
| expenditures miscellaneous 2017 Parking fees                                      | 19.39<br>(4.02)   | 19.38<br>(4.02)   | 19.38<br>(4.02)   |
| expenditures miscellaneous 2017 Parking fees in home city excluding residence     | 16.50<br>(3.45)   | 16.49<br>(3.46)   | 16.49<br>(3.46)   |
| expenditures miscellaneous 2017 Parking fees out of town                          | 2.86 (0.52)       | 2.86 (0.52)       | 2.86 (0.52)       |

|                                                                               |                     |                     |                     |
|-------------------------------------------------------------------------------|---------------------|---------------------|---------------------|
| expenditures miscellaneous 2017 Tolls or electronic toll passes               | 15.47<br>(2.57)     | 15.46<br>(2.58)     | 15.46<br>(2.58)     |
| expenditures miscellaneous 2017 Tolls on out of town                          | 2.16 (0.34)         | 2.16 (0.34)         | 2.16 (0.34)         |
| expenditures miscellaneous 2017 Towing charges                                | 1.61 (0.18)         | 1.61 (0.18)         | 1.61 (0.18)         |
| expenditures miscellaneous 2017 Public and other transportation               | 274.47<br>(58.61)   | 274.25<br>(58.68)   | 274.25<br>(58.68)   |
| expenditures miscellaneous 2017 Airline fares                                 | 174.85<br>(40.09)   | 174.68<br>(40.16)   | 174.68<br>(40.16)   |
| expenditures miscellaneous 2017 Intercity bus fares                           | 4.54 (0.56)         | 4.54 (0.56)         | 4.54 (0.56)         |
| expenditures miscellaneous 2017 Intracity mass transit fares                  | 34.07<br>(5.85)     | 34.10<br>(5.85)     | 34.10<br>(5.85)     |
| expenditures miscellaneous 2017 Local trans on out of tow                     | 5.41 (1.30)         | 5.40 (1.30)         | 5.40 (1.30)         |
| expenditures miscellaneous 2017Taxi fares and limousine sers on trips         | 3.16 (0.76)         | 3.16 (0.76)         | 3.16 (0.76)         |
| expenditures miscellaneous 2017Taxi fares and limousine sers                  | 13.35<br>(2.40)     | 13.34<br>(2.40)     | 13.34<br>(2.40)     |
| expenditures miscellaneous 2017Intercity train fares                          | 7.00 (1.27)         | 7.00 (1.27)         | 7.00 (1.27)         |
| expenditures miscellaneous 2017Ship fares                                     | 30.01<br>(6.73)     | 29.97<br>(6.77)     | 29.97<br>(6.77)     |
| expenditures miscellaneous 2017School bus                                     | 2.60 (0.98)         | 2.59 (0.98)         | 2.59 (0.98)         |
| expenditures miscellaneous 2017Healthcare                                     | 1773.09<br>(242.26) | 1771.71<br>(243.30) | 1771.71<br>(243.30) |
| expenditures miscellaneous 2017 Health insurance                              | 1209.18<br>(156.31) | 1208.34<br>(156.91) | 1208.34<br>(156.91) |
| expenditures miscellaneous 2017 Commercial health insurance                   | 235.79<br>(33.50)   | 235.61<br>(33.66)   | 235.61<br>(33.66)   |
| expenditures miscellaneous 2017Blue Cross Blue Shield                         | 413.19<br>(54.50)   | 412.89<br>(54.76)   | 412.89<br>(54.76)   |
| expenditures miscellaneous 2017 Commercial medicare supp BCBS                 | 15.62<br>(3.89)     | 15.60<br>(3.89)     | 15.60<br>(3.89)     |
| expenditures miscellaneous 2017 other health insurance BCBS                   | 12.05<br>(1.53)     | 12.05<br>(1.53)     | 12.05<br>(1.53)     |
| expenditures miscellaneous 2017 Medicare payments                             | 178.27<br>(34.93)   | 178.17<br>(34.90)   | 178.17<br>(34.90)   |
| expenditures miscellaneous 2017 Medicare prescription drug premium            | 39.06<br>(8.16)     | 39.04<br>(8.16)     | 39.04<br>(8.16)     |
| expenditures miscellaneous 2017 Commercial medicare supps and OT health insur | 78.74<br>(15.78)    | 78.66<br>(15.82)    | 78.66<br>(15.82)    |
| expenditures miscellaneous 2017 Commercial medicare supp not blue cross       | 43.12<br>(10.78)    | 43.07<br>(10.79)    | 43.07<br>(10.79)    |
| expenditures miscellaneous 2017 other health insurance not BCBS               | 35.82<br>(5.64)     | 35.78<br>(5.67)     | 35.78<br>(5.67)     |
| expenditures miscellaneous 2017 Long term care insurance                      | 33.51<br>(5.51)     | 33.48<br>(5.53)     | 33.48<br>(5.53)     |
| expenditures miscellaneous 2017 Medical services                              | 331.20<br>(53.07)   | 330.84<br>(53.39)   | 330.84<br>(53.39)   |
| expenditures miscellaneous 2017 physicians services                           | 73.01<br>(10.87)    | 72.94<br>(10.94)    | 72.94<br>(10.94)    |

|                                                                                     |                     |                     |                     |
|-------------------------------------------------------------------------------------|---------------------|---------------------|---------------------|
| expenditures miscellaneous 2017 Dental services                                     | 119.74<br>(19.14)   | 119.62<br>(19.24)   | 119.62<br>(19.24)   |
| expenditures miscellaneous 2017 Eyecare services                                    | 18.53<br>(2.56)     | 18.52<br>(2.57)     | 18.52<br>(2.57)     |
| expenditures miscellaneous 2017 services by professionals other than physician      | 25.02<br>(4.20)     | 24.99<br>(4.23)     | 24.99<br>(4.23)     |
| expenditures miscellaneous 2017 Lab tests x.rays                                    | 19.55<br>(3.24)     | 19.53<br>(3.26)     | 19.53<br>(3.26)     |
| expenditures miscellaneous 2017 Hospital room and service                           | 56.13<br>(9.75)     | 56.06<br>(9.81)     | 56.06<br>(9.81)     |
| expenditures miscellaneous 2017 Care in convalescent or nursing home                | 9.72 (2.70)         | 9.71 (2.70)         | 9.71 (2.70)         |
| expenditures miscellaneous 2017 other medical care services                         | 10.45<br>(2.05)     | 10.43<br>(2.06)     | 10.43<br>(2.06)     |
| expenditures miscellaneous 2017 Drugs                                               | 173.14<br>(26.15)   | 172.99<br>(26.25)   | 172.99<br>(26.25)   |
| expenditures miscellaneous 2017 Nonprescription drugs                               | 40.93<br>(5.94)     | 40.89<br>(5.97)     | 40.89<br>(5.97)     |
| expenditures miscellaneous 2017 Nonprescription vitamins                            | 23.64<br>(3.55)     | 23.62<br>(3.57)     | 23.62<br>(3.57)     |
| expenditures miscellaneous 2017 Prescription drugs                                  | 108.57<br>(16.90)   | 108.48<br>(16.94)   | 108.48<br>(16.94)   |
| expenditures miscellaneous 2017 Medical supplies                                    | 60.31<br>(8.52)     | 60.26<br>(8.56)     | 60.26<br>(8.56)     |
| expenditures miscellaneous 2017 Eyeglasses and contact lenses                       | 29.76<br>(3.77)     | 29.74<br>(3.78)     | 29.74<br>(3.78)     |
| expenditures miscellaneous 2017 Hearing aids                                        | 9.51 (2.41)         | 9.49 (2.41)         | 9.49 (2.41)         |
| expenditures miscellaneous 2017 Topicals and dressings                              | 16.71<br>(2.40)     | 16.69<br>(2.41)     | 16.69<br>(2.41)     |
| expenditures miscellaneous 2017 Adult diapers                                       | 1.07 (0.11)         | 1.07 (0.11)         | 1.07 (0.11)         |
| expenditures miscellaneous 2017 Medical equipment for general use                   | 1.82 (0.36)         | 1.82 (0.36)         | 1.82 (0.36)         |
| expenditures miscellaneous 2017 Supportive and convalescent medical equipment       | 1.27 (0.23)         | 1.27 (0.23)         | 1.27 (0.23)         |
| expenditures miscellaneous 2017 Rental of medical equipment                         | 0.23 (0.05)         | 0.23 (0.05)         | 0.23 (0.05)         |
| expenditures miscellaneous 2017 Rental of supportive convalescent medical equipment | 0.22 (0.04)         | 0.22 (0.04)         | 0.22 (0.04)         |
| expenditures miscellaneous 2017 Entertainment                                       | 1164.41<br>(169.61) | 1163.45<br>(170.43) | 1163.45<br>(170.43) |
| expenditures miscellaneous 2017 Fees and admissions                                 | 282.98<br>(57.32)   | 282.67<br>(57.56)   | 282.67<br>(57.56)   |
| expenditures miscellaneous 2017 Recreation expenses out of town                     | 8.96 (1.78)         | 8.95 (1.78)         | 8.95 (1.78)         |
| expenditures miscellaneous 2017 Social recreation health club membership            | 70.60<br>(15.34)    | 70.52<br>(15.40)    | 70.52<br>(15.40)    |
| expenditures miscellaneous 2017 Fees for participant sports                         | 41.89<br>(7.67)     | 41.83<br>(7.72)     | 41.83<br>(7.72)     |

|                                                                                     |                |                |                |
|-------------------------------------------------------------------------------------|----------------|----------------|----------------|
| expenditures miscellaneous 2017 Participant sports out of town                      | 8.43 (2.03)    | 8.42 (2.03)    | 8.42 (2.03)    |
| expenditures miscellaneous 2017 Movie other admissions out of town                  | 24.25 (5.08)   | 24.22 (5.09)   | 24.22 (5.09)   |
| expenditures miscellaneous 2017 Admission to sporting events                        | 18.71 (4.64)   | 18.69 (4.65)   | 18.69 (4.65)   |
| expenditures miscellaneous 2017 Admission to sports events out of town              | 8.06 (1.69)    | 8.06 (1.70)    | 8.06 (1.70)    |
| expenditures miscellaneous 2017 Fees for recreational lessons                       | 49.74 (10.84)  | 49.68 (10.88)  | 49.68 (10.88)  |
| expenditures miscellaneous 2017 other entertainment services out of town            | 8.96 (1.78)    | 8.95 (1.78)    | 8.95 (1.78)    |
| expenditures miscellaneous 2017 Pets toys hobbies and playground equipment          | 271.69 (44.42) | 271.39 (44.69) | 271.39 (44.69) |
| expenditures miscellaneous 2017 Pets                                                | 218.71 (35.94) | 218.47 (36.15) | 218.47 (36.15) |
| expenditures miscellaneous 2017 Pet food                                            | 96.65 (16.15)  | 96.54 (16.24)  | 96.54 (16.24)  |
| expenditures miscellaneous 2017 Pet purchase supplies medicine                      | 47.78 (7.85)   | 47.72 (7.90)   | 47.72 (7.90)   |
| expenditures miscellaneous 2017 Pet services                                        | 20.46 (4.04)   | 20.44 (4.06)   | 20.44 (4.06)   |
| expenditures miscellaneous 2017 Vet services                                        | 54.29 (8.92)   | 54.23 (8.97)   | 54.23 (8.97)   |
| expenditures miscellaneous 2017 Toys games arts and crafts and tricycles            | 52.01 (8.12)   | 51.95 (8.18)   | 51.95 (8.18)   |
| expenditures miscellaneous 2017 Stamp and coin collecting                           | 1.59 (0.36)    | 1.59 (0.36)    | 1.59 (0.36)    |
| expenditures miscellaneous 2017 Playground equipment                                | 1.60 (0.25)    | 1.59 (0.26)    | 1.59 (0.26)    |
| expenditures miscellaneous 2017 other entertainment supplies equipment and services | 192.66 (36.15) | 192.43 (36.35) | 192.43 (36.35) |
| expenditures miscellaneous 2017 Unmotored recreational vehicles                     | 34.30 (7.49)   | 34.25 (7.52)   | 34.25 (7.52)   |
| expenditures miscellaneous 2017 Boat without motor and boat trailers                | 4.30 (1.16)    | 4.29 (1.16)    | 4.29 (1.16)    |
| expenditures miscellaneous 2017 Trailer and other attachable campers                | 30.25 (7.04)   | 30.21 (7.06)   | 30.21 (7.06)   |
| expenditures miscellaneous 2017 Motorized recreational vehicles                     | 61.44 (13.76)  | 61.35 (13.84)  | 61.35 (13.84)  |
| expenditures miscellaneous 2017 Purchase of motorized camper                        | 24.53 (5.83)   | 24.49 (5.86)   | 24.49 (5.86)   |
| expenditures miscellaneous 2017 Purchase of other vehicle                           | 21.38 (5.02)   | 21.35 (5.05)   | 21.35 (5.05)   |
| expenditures miscellaneous 2017 Purchase of boat with motor                         | 16.14 (3.45)   | 16.12 (3.47)   | 16.12 (3.47)   |
| expenditures miscellaneous 2017 Sports recreation and exercise equipment            | 55.49 (9.87)   | 55.43 (9.91)   | 55.43 (9.91)   |
| expenditures miscellaneous 2017 Athletic gear game tables and exercise equipment    | 18.63 (3.29)   | 18.61 (3.31)   | 18.61 (3.31)   |
| expenditures miscellaneous 2017 Bicycles                                            | 9.85 (1.67)    | 9.84 (1.68)    | 9.84 (1.68)    |

|                                                                                |                   |                   |                   |
|--------------------------------------------------------------------------------|-------------------|-------------------|-------------------|
| expenditures miscellaneous 2017 Camping equipment                              | 4.77 (0.67)       | 4.76 (0.67)       | 4.76 (0.67)       |
| expenditures miscellaneous 2017 Hunting and fishing equipment                  | 13.73<br>(2.78)   | 13.72<br>(2.80)   | 13.72<br>(2.80)   |
| expenditures miscellaneous 2017 Winter sports equipment                        | 2.22 (0.47)       | 2.21 (0.47)       | 2.21 (0.47)       |
| expenditures miscellaneous 2017 Water sports equipment                         | 1.80 (0.43)       | 1.80 (0.43)       | 1.80 (0.43)       |
| expenditures miscellaneous 2017 other sports equipment                         | 3.22 (0.49)       | 3.22 (0.49)       | 3.22 (0.49)       |
| expenditures miscellaneous 2017 Global positioning system devices              | 0.39 (0.32)       | 0.39 (0.33)       | 0.39 (0.33)       |
| expenditures miscellaneous 2017 Rental and repair of misc sports equipment     | 0.65 (0.13)       | 0.65 (0.13)       | 0.65 (0.13)       |
| expenditures miscellaneous 2017 Photographic equipment supplies and services   | 18.18<br>(2.31)   | 18.17<br>(2.32)   | 18.17<br>(2.32)   |
| expenditures miscellaneous 2017 Film                                           | 0.41 (0.09)       | 0.41 (0.09)       | 0.41 (0.09)       |
| expenditures miscellaneous 2017 other photographic supplies                    | 0.21 (0.06)       | 0.21 (0.06)       | 0.21 (0.06)       |
| expenditures miscellaneous 2017 Photo processing                               | 2.91 (0.49)       | 2.90 (0.49)       | 2.90 (0.49)       |
| expenditures miscellaneous 2017 Photographic equipment                         | 7.12 (1.02)       | 7.11 (1.02)       | 7.11 (1.02)       |
| expenditures miscellaneous 2017 Photographer fees                              | 7.23 (0.93)       | 7.23 (0.93)       | 7.23 (0.93)       |
| expenditures miscellaneous 2017 Fireworks                                      | 2.58 (0.66)       | 2.58 (0.66)       | 2.58 (0.66)       |
| expenditures miscellaneous 2017 Souvenirs                                      | 0.91 (0.19)       | 0.91 (0.19)       | 0.91 (0.19)       |
| expenditures miscellaneous 2017 Visual goods                                   | 0.35 (0.08)       | 0.35 (0.08)       | 0.35 (0.08)       |
| expenditures miscellaneous 2017 Pinball electronic video games                 | 0.78 (0.13)       | 0.78 (0.14)       | 0.78 (0.14)       |
| expenditures miscellaneous 2017 Personal care products and services            | 275.08<br>(31.56) | 274.96<br>(31.64) | 274.96<br>(31.64) |
| expenditures miscellaneous 2017 Personal care products                         | 152.56<br>(18.05) | 152.47<br>(18.12) | 152.47<br>(18.12) |
| expenditures miscellaneous 2017 Hair care products                             | 29.88<br>(3.37)   | 29.87<br>(3.38)   | 29.87<br>(3.38)   |
| expenditures miscellaneous 2017 Nonelectric articles for the hair              | 5.62 (0.71)       | 5.61 (0.71)       | 5.61 (0.71)       |
| expenditures miscellaneous 2017 Wigs and hairpieces                            | 0.90 (0.72)       | 0.91 (0.73)       | 0.91 (0.73)       |
| expenditures miscellaneous 2017 Oral hygiene products articles                 | 17.81<br>(2.05)   | 17.80<br>(2.05)   | 17.80<br>(2.05)   |
| expenditures miscellaneous 2017 Shaving needs                                  | 9.01 (1.30)       | 9.00 (1.31)       | 9.00 (1.31)       |
| expenditures miscellaneous 2017 Cosmetics perfume bath preparations            | 68.01<br>(8.29)   | 67.96<br>(8.33)   | 67.96<br>(8.33)   |
| expenditures miscellaneous 2017 Deodorants feminine hygiene misc personal care | 17.35<br>(2.10)   | 17.34<br>(2.11)   | 17.34<br>(2.11)   |
| expenditures miscellaneous 2017 Electric personal care appliances              | 4.10 (0.59)       | 4.09 (0.59)       | 4.09 (0.59)       |
| expenditures miscellaneous 2017 Personal care services                         | 122.54<br>(14.14) | 122.51<br>(14.14) | 122.51<br>(14.14) |
| expenditures miscellaneous 2017 Reading                                        | 46.00<br>(7.01)   | 45.96<br>(7.05)   | 45.96<br>(7.05)   |
| expenditures miscellaneous 2017 Books through book clubs                       | 1.39 (0.26)       | 1.38 (0.26)       | 1.38 (0.26)       |

|                                                                          |                    |                    |                    |
|--------------------------------------------------------------------------|--------------------|--------------------|--------------------|
| expenditures miscellaneous 2017 Books not through book clubs             | 10.97<br>(2.21)    | 10.96<br>(2.22)    | 10.96<br>(2.22)    |
| expenditures miscellaneous 2017 Digital book readers                     | 9.63 (1.35)        | 9.63 (1.35)        | 9.63 (1.35)        |
| expenditures miscellaneous 2017 School supplies unspecified              | 24.24<br>(3.03)    | 24.22<br>(3.04)    | 24.22<br>(3.04)    |
| expenditures miscellaneous 2017 Tobacco products and smoking supplies    | 134.34<br>(14.24)  | 134.28<br>(14.28)  | 134.28<br>(14.28)  |
| expenditures miscellaneous 2017 Cigarettes                               | 116.47<br>(11.88)  | 116.43<br>(11.91)  | 116.43<br>(11.91)  |
| expenditures miscellaneous 2017 other tobacco products                   | 13.50<br>(1.86)    | 13.48<br>(1.87)    | 13.48<br>(1.87)    |
| expenditures miscellaneous 2017 Smoking accessories                      | 3.19 (0.43)        | 3.18 (0.43)        | 3.18 (0.43)        |
| expenditures miscellaneous 2017 misc expenses                            | 353.70<br>(47.72)  | 353.45<br>(47.93)  | 353.45<br>(47.93)  |
| expenditures miscellaneous 2017 Lotteries and mutuel losses              | 21.29<br>(3.26)    | 21.27<br>(3.27)    | 21.27<br>(3.27)    |
| expenditures miscellaneous 2017 Legal fees                               | 62.71<br>(11.32)   | 62.64<br>(11.38)   | 62.64<br>(11.38)   |
| expenditures miscellaneous 2017 Funeral                                  | 27.38<br>(4.57)    | 27.37<br>(4.57)    | 27.37<br>(4.57)    |
| expenditures miscellaneous 2017 Safe deposit box rental                  | 1.61 (0.27)        | 1.61 (0.27)        | 1.61 (0.27)        |
| expenditures miscellaneous 2017 Checking accounts other bank ser charges | 11.83<br>(1.00)    | 11.83<br>(1.00)    | 11.83<br>(1.00)    |
| expenditures miscellaneous 2017 Cemetery lots vaults maintenance fees    | 2.32 (0.42)        | 2.32 (0.42)        | 2.32 (0.42)        |
| expenditures miscellaneous 2017 Accounting fees                          | 26.16<br>(5.28)    | 26.13<br>(5.30)    | 26.13<br>(5.30)    |
| expenditures miscellaneous 2017 misc personal services                   | 16.42<br>(2.36)    | 16.41<br>(2.38)    | 16.41<br>(2.38)    |
| expenditures miscellaneous 2017 Dating services                          | 0.22 (0.04)        | 0.22 (0.04)        | 0.22 (0.04)        |
| expenditures miscellaneous 2017 Occupational expenses                    | 18.62<br>(2.64)    | 18.61<br>(2.65)    | 18.61<br>(2.65)    |
| expenditures miscellaneous 2017 expenses for other properties            | 17.31<br>(2.97)    | 17.29<br>(2.99)    | 17.29<br>(2.99)    |
| expenditures miscellaneous 2017 Credit card memberships                  | 1.99 (0.48)        | 1.99 (0.48)        | 1.99 (0.48)        |
| expenditures miscellaneous 2017 Shopping club membership fees            | 7.31 (1.02)        | 7.31 (1.02)        | 7.31 (1.02)        |
| expenditures miscellaneous 2017 Vacation clubs                           | 11.29<br>(4.47)    | 11.28<br>(4.47)    | 11.28<br>(4.47)    |
| expenditures miscellaneous 2017 Cash contributions                       | 734.69<br>(107.99) | 734.24<br>(108.24) | 734.24<br>(108.24) |
| expenditures miscellaneous 2017 Support for college students             | 41.57<br>(6.82)    | 41.54<br>(6.83)    | 41.54<br>(6.83)    |
| expenditures miscellaneous 2017 Alimony expenditures                     | 29.37<br>(5.15)    | 29.34<br>(5.16)    | 29.34<br>(5.16)    |
| expenditures miscellaneous 2017 Child support expenditures               | 85.04<br>(8.61)    | 85.02<br>(8.62)    | 85.02<br>(8.62)    |

|                                                                                         |                     |                     |                     |
|-----------------------------------------------------------------------------------------|---------------------|---------------------|---------------------|
| expenditures miscellaneous 2017 Gift to non credit union members of stock bond mutual   | 25.11<br>(3.34)     | 25.11<br>(3.33)     | 25.11<br>(3.33)     |
| expenditures miscellaneous 2017 Cash contributions to charities and other organizations | 90.76<br>(20.88)    | 90.65<br>(20.95)    | 90.65<br>(20.95)    |
| expenditures miscellaneous 2017 Cash contributions to church religious organizations    | 317.66<br>(39.27)   | 317.53<br>(39.33)   | 317.53<br>(39.33)   |
| expenditures miscellaneous 2017 Cash contributions to educational institutions          | 15.45<br>(4.87)     | 15.43<br>(4.88)     | 15.43<br>(4.88)     |
| expenditures miscellaneous 2017 Cash contributions to political organizations           | 3.23 (0.60)         | 3.23 (0.60)         | 3.23 (0.60)         |
| expenditures miscellaneous 2017 other cash gifts                                        | 130.01<br>(17.72)   | 129.91<br>(17.79)   | 129.91<br>(17.79)   |
| expenditures miscellaneous 2017 Personal insurance and pensions                         | 2710.00<br>(499.34) | 2707.94<br>(500.55) | 2707.94<br>(500.55) |
| expenditures miscellaneous 2017 Life and other personal insurance                       | 139.93<br>(21.23)   | 139.84<br>(21.28)   | 139.84<br>(21.28)   |
| expenditures miscellaneous 2017 Life endowment annuity other personal insurance         | 130.33<br>(19.61)   | 130.25<br>(19.65)   | 130.25<br>(19.65)   |
| expenditures miscellaneous 2017 other non-health insurance                              | 9.62 (1.63)         | 9.61 (1.64)         | 9.61 (1.64)         |
| expenditures miscellaneous 2017 Pensions and Social Security                            | 2570.38<br>(477.85) | 2568.41<br>(479.01) | 2568.41<br>(479.01) |



Appendix F.1. Consumer expenditure second order variables, expressed as 2017 county per capita or per capita %, eligible for feature selection, for each outcome

| <b>Log ER Visits (2,475)</b>                                                                                            |                        |
|-------------------------------------------------------------------------------------------------------------------------|------------------------|
| <i>Variable Name</i>                                                                                                    | <i>Mean (SD)</i>       |
| expenditures food 2017 Baby food *expenditures home 2017 Rent as pay                                                    | 430.78<br>(74.50)      |
| expenditures food 2017 Nonalcoholic beer *expenditures home 2017 Rent as pay                                            | 2.41 (0.72)            |
| expenditures food 2017 Dinner at Employer or School Cafeteria *expenditures home 2017 Rent as pay                       | 74.56<br>(19.25)       |
| expenditures food 2017 Snack nonalcoholic beverages at Employer or School cafeteria *expenditures home 2017 Rent as pay | 133.93<br>(25.86)      |
| expenditures food 2017 Breakfast and brunch at Employer or School Cafeteria *expenditures home 2017 Rent as pay         | 167.33<br>(40.03)      |
| expenditures food 2017 Meals as pay *expenditures home 2017 Rent as pay                                                 | 335.55<br>(85.01)      |
| expenditures food 2017 Test preparation tutoring services *expenditures home 2017 Rent as pay                           | 210.95<br>(67.98)      |
| expenditures food 2017 School supplies for day care nursery *expenditures home 2017 Rent as pay                         | 4.17 (0.88)            |
| expenditures home 2017 Mortgage interest *expenditures home 2017 Rent as pay                                            | 38173.45<br>(7208.87)  |
| expenditures home 2017 Interest paid home equity loan *expenditures home 2017 Rent as pay                               | 483.27<br>(86.20)      |
| expenditures home 2017 Ground rent *expenditures home 2017 Rent as pay                                                  | 768.25<br>(199.37)     |
| expenditures home 2017 Rented dwellings *expenditures home 2017 Rent as pay                                             | 43546.27<br>(18100.82) |
| expenditures home 2017 Rent *expenditures home 2017 Rent as pay                                                         | 41189.88<br>(17218.55) |
| expenditures home 2017 Main insurance and other Rented *expenditures home 2017 Rent as pay                              | 1313.95<br>(347.46)    |
| expenditures home 2017 Tenants insurance *expenditures home 2017 Rent as pay                                            | 249.27<br>(95.14)      |
| expenditures home 2017 Coin operated household laundry dryclean *expenditures home 2017 Rent as pay                     | 124.85<br>(55.39)      |
| expenditures home 2017 Computer Installation *expenditures home 2017 Rent as pay                                        | 2.72 (0.75)            |
| expenditures home 2017 Delivery services *expenditures home 2017 Rent as pay                                            | 54.35<br>(10.40)       |
| expenditures home 2017 Sewing machines *expenditures home 2017 Rent as pay                                              | 77.07<br>(18.81)       |

|                                                                                                           |                         |
|-----------------------------------------------------------------------------------------------------------|-------------------------|
| expenditures home 2017 Flatware *expenditures home 2017 Rent as pay                                       | 58.04<br>(17.32)        |
| expenditures home 2017 Telephones and accessories *expenditures home 2017 Rent as pay                     | 661.17<br>(189.82)      |
| expenditures home 2017 Lawn and garden equipment *expenditures home 2017 Rent as pay                      | 744.22<br>(164.21)      |
| expenditures home 2017 Rental of furniture *expenditures home 2017 Rent as pay                            | 64.93<br>(26.22)        |
| expenditures home 2017 Boys hosiery *expenditures home 2017 Rent as pay                                   | 79.11<br>(16.74)        |
| expenditures home 2017 Womens sport coats tailored jackets *expenditures home 2017 Rent as pay            | 107.26<br>(40.12)       |
| expenditures home 2017 Girls hosiery *expenditures home 2017 Rent as pay                                  | 56.09<br>(14.78)        |
| expenditures home 2017 Girls uniforms *expenditures home 2017 Rent as pay                                 | 32.83 (9.76)            |
| expenditures home 2017 Girls costumes *expenditures home 2017 Rent as pay                                 | 34.17 (5.54)            |
| expenditures home 2017 Infant nightwear loungewear *expenditures home 2017 Rent as pay                    | 86.98<br>(19.62)        |
| expenditures misc 2017 Online gaming services *expenditures home 2017 Rent as pay                         | 44.72 (8.12)            |
| expenditures misc 2017 Repair of tv radio and sound equipment*expenditures home 2017 Rent as pay          | 17.68 (4.81)            |
| expenditures misc 2017 Rental of televisions *expenditures home 2017 Rent as pay                          | 7.51 (8.74)             |
| expenditures misc 2017 Personal digital audio players *expenditures home 2017 Rent as pay                 | 24.01 (5.54)            |
| expenditures misc 2017 Satellite dishes *expenditures home 2017 Rent as pay                               | 15.06 (5.34)            |
| expenditures misc 2017 Termination fee for car trucklease *expenditures home 2017 Rent as pay             | 5.07 (1.33)             |
| expenditures misc 2017 Gas tank repair replacement *expenditures home 2017 Rent as pay                    | 165.04<br>(35.70)       |
| expenditures misc 2017 Value surrender of whole life insurance policy *Rexpenditures home 2017 ent as pay | 101364.47<br>(30390.01) |
| expenditures misc 2017 Watches *expenditures home 2017 Rent as pay                                        | 841.94<br>(313.89)      |
| expenditures misc 2017 Coin operated apparel laundry dryclean *expenditures home 2017 Rent as pay         | 472.11<br>(213.15)      |
| expenditures misc 2017 Clothing rental *expenditures home 2017 Rent as pay                                | 26.24 (5.58)            |
| expenditures misc 2017 Watch and jewelry repair *expenditures home 2017 Rent as pay                       | 365.99<br>(156.91)      |
| expenditures misc 2017 Vehicle purchases net outlay *expenditures home 2017 Rent as pay                   | 52544.90<br>(10130.09)  |

|                                                                                                          |                       |
|----------------------------------------------------------------------------------------------------------|-----------------------|
| expenditures misc 2017 School bus *expenditures home 2017 Rent as pay                                    | 81.74<br>(33.76)      |
| expenditures misc 2017 Medicare payments *expenditures home 2017 Rent as pay                             | 5715.07<br>(1448.99)  |
| expenditures misc 2017 Long term care insurance *expenditures home 2017 Rent as pay                      | 1065.42<br>(215.29)   |
| expenditures misc 2017 Care in convalescent or nursing home *expenditures home 2017 Rent as pay          | 307.19<br>(89.10)     |
| expenditures misc 2017 Medical equipment for general use *expenditures home 2017 Rent as pay             | 57.70<br>(13.02)      |
| expenditures misc 2017 Supportive and convalescent medical equipment *expenditures home 2017 Rent as pay | 40.02 (7.73)          |
| expenditures misc 2017 Unmotored recreational vehicles *expenditures home 2017 Rent as pay               | 1079.67<br>(238.35)   |
| expenditures misc 2017 Boat without motor and boat trailers *expenditures home 2017 Rent as pay          | 134.26<br>(33.49)     |
| expenditures misc 2017Trailer and other attachable campers *expenditures home 2017 Rent as pay           | 953.00<br>(226.56)    |
| expenditures misc 2017 Global positioning system devices *expenditures home 2017 Rent as pay             | 14.07<br>(16.32)      |
| expenditures misc 2017 Fireworks *expenditures home 2017 Rent as pay                                     | 80.90<br>(19.02)      |
| expenditures misc 2017 Visual goods *expenditures home 2017 Rent as pay                                  | 10.92 (2.42)          |
| expenditures misc 2017 Wigs and hairpieces *expenditures home 2017 Rent as pay                           | 32.76<br>(37.79)      |
| expenditures misc 2017 Expenses for other properties *expenditures home 2017 Rent as pay                 | 548.05<br>(106.33)    |
| expenditures misc 2017 Cash contributions to political organizations *expenditures home 2017 Rent as pay | 102.28<br>(21.14)     |
| <b>Log IP Days (2,491)</b>                                                                               |                       |
| <i>Variable Name</i>                                                                                     | <i>Mean (SD)</i>      |
| expenditures food 2017 Prepared flour mixes *expenditures home 2017 Rent                                 | 6485.41<br>(1393.23)  |
| expenditures food 2017 Sugar *expenditures home 2017 Rent                                                | 9158.72<br>(2192.24)  |
| expenditures food 2017 Baby food *expenditures home 2017 Rent                                            | 16680.99<br>(3175.11) |
| expenditures food 2017 Nonalcoholic beer *expenditures home 2017 Rent                                    | 93.83<br>(30.52)      |
| expenditures food 2017 Dinner at Employer or School Cafeteria *expenditures home 2017                    | 2878.93<br>(757.33)   |
| expenditures food 2017 Breakfast and brunch at Employer or School Cafeteria *expenditures home 2017 Rent | 6465.70<br>(1581.26)  |

|                                                                                                             |                           |
|-------------------------------------------------------------------------------------------------------------|---------------------------|
| expenditures food 2017 School supplies for elementary high school<br>*expenditures home 2017 Rent           | 8407.86<br>(1627.09)      |
| expenditures food 2017 School supplies for vocational and technical<br>schools *expenditures home 2017 Rent | 258.48<br>(62.71)         |
| expenditures food 2017 School supplies for day care nursery<br>*expenditures home 2017 Rent                 | 161.48<br>(37.49)         |
| expenditures home 2017 Ground rent *expenditures home 2017 Rent                                             | 29385.39<br>(6548.13)     |
| expenditures home 2017 Rented dwellings *expenditures home 2017<br>Rent                                     | 1674740.98<br>(671854.73) |
| expenditures home 2017 Rent as pay *expenditures home 2017 Rent                                             | 41232.61<br>(17252.16)    |
| expenditures home 2017 Tenants insurance *expenditures home 2017<br>Rent                                    | 9582.80<br>(3491.74)      |
| expenditures home 2017Coal wood and Other fuels *expenditures home<br>2017 Rent                             | 4296.75<br>(883.44)       |
| expenditures home 2017 household laundry dryclean not coin.operated<br>*expenditures home 2017 Rent         | 9052.20<br>(2750.59)      |
| expenditures home 2017 Computer Installation *expenditures home 2017<br>Rent                                | 104.52<br>(27.88)         |
| expenditures home 2017 Kitchen dining room furniture *expenditures<br>home 2017 Rent                        | 20860.64<br>(5976.12)     |
| expenditures home 2017 Sewing machines *expenditures home 2017 Rent                                         | 2960.04<br>(659.05)       |
| expenditures home 2017 Flatware * expenditures home 2017 Rent                                               | 2245.14<br>(683.62)       |
| expenditures home 2017 Telephones and accessories * expenditures home<br>2017 Rent                          | 25651.07<br>(7965.37)     |
| expenditures home 2017 Office furniture home use * expenditures home<br>2017 Rent                           | 3447.22<br>(1329.65)      |
| expenditures home 2017 Rental of furniture *expenditures home 2017<br>Rent                                  | 2484.82<br>(895.21)       |
| expenditures home 2017 Mens sportcoats tailored jackets *expenditures<br>home 2017 Rent                     | 3919.36<br>(1369.16)      |
| expenditures home 2017 Boys 2 15 clothing *expenditures home<br>2017Rent                                    | 52070.66<br>(10500.37)    |
| expenditures home 2017 Boys accessories *expenditures home 2017 Rent                                        | 3303.06<br>(927.59)       |
| expenditures home 2017 Boys suits sportcoats vests *expenditures home<br>2017 Rent                          | 568.51<br>(127.26)        |
| expenditures home 2017 Boys pants and shorts *expenditures home<br>2017 Rent                                | 13159.06<br>(2993.98)     |
| expenditures home 2017 Womens uniforms *expenditures home 2017<br>Rent                                      | 2719.71<br>(638.87)       |
| expenditures home 2017 Girls coats and jackets *expenditures home<br>2017 Rent                              | 2682.53<br>(603.73)       |

|                                                                                                         |                        |
|---------------------------------------------------------------------------------------------------------|------------------------|
| expenditures home 2017 Girls hosiery *expenditures home 2017 Rent                                       | 2156.39<br>(501.45)    |
| expenditures home 2017 Infant coat jacket snowsuit *expenditures home 2017 Rent                         | 521.81<br>(123.98)     |
| expenditures home 2017 Infant nightwear loungewear *expenditures home 2017 Rent                         | 3352.67<br>(714.38)    |
| expenditures home 2017 Boys footwear *expenditures home 2017 Rent                                       | 26259.14<br>(6937.01)  |
| expenditures home 2017 VCRs and video disc players *expenditures home 2017 Rent                         | 1901.96<br>(437.20)    |
| expenditures misc 2017 Repair of tv radio and sound equipment *expenditures home 2017 Rent              | 677.85<br>(157.63)     |
| expenditures misc 2017 Rental of televisions *expenditures home 2017 Rent                               | 105.93<br>(251.35)     |
| expenditures misc 2017 Termination fee for car trucklease *expenditures home 2017 Rent                  | 196.08<br>(51.08)      |
| expenditures misc 2017 Trade in allowance for car trucklease *expenditures home 2017 Rent               | 19416.24<br>(3593.33)  |
| expenditures misc 2017 Gas tank repair replacement *expenditures home 2017 Rent                         | 6376.91<br>(1385.94)   |
| expenditures misc 2017 Watches *expenditures home 2017 Rent                                             | 32935.35<br>(13991.83) |
| expenditures misc 2017 Coin operated apparel laundry dryclean *expenditures home 2017 Rent              | 18060.41<br>(7445.67)  |
| expenditures misc 2017 Apparel laundry dryclean not coin.operated *expenditures home 2017 Rent          | 22297.31<br>(7423.46)  |
| expenditures misc 2017 New motorcycles *expenditures home 2017 Rent                                     | 15720.71<br>(3620.90)  |
| expenditures misc 2017 Towing charges *expenditures home 2017 Rent                                      | 2018.99<br>(590.41)    |
| expenditures misc 2017 Intracity mass transit fares *expenditures home 2017 Rent                        | 43221.20<br>(15870.19) |
| expenditures misc 2017 Medicare prescription drug premium *expenditures home 2017 Rent                  | 47878.98<br>(10791.16) |
| expenditures misc 2017 Commercial medicare supp not blue cross *expenditures home 2017 Rent             | 52525.09<br>(13062.01) |
| expenditures misc 2017 Medical equipment for general use *expenditures home 2017 Rent                   | 2215.99<br>(446.46)    |
| expenditures misc 2017 Rental of medical equipment *expenditures home 2017 Rent                         | 277.92<br>(64.83)      |
| expenditures misc 2017 Rental of supportive convalescent medical equipment *expenditures home 2017 Rent | 267.85<br>(57.57)      |
| expenditures misc 2017 Purchase of boat with motor *expenditures home 2017 Rent                         | 19688.89<br>(4623.05)  |
| expenditures misc 2017 Souvenirs *expenditures home 2017 Rent                                           | 1119.75<br>(277.84)    |

|                                                                                                                       |                       |
|-----------------------------------------------------------------------------------------------------------------------|-----------------------|
| expenditures misc 2017 Pinball electronic video games *expenditures home 2017 Rent                                    | 982.62<br>(328.98)    |
| expenditures misc 2017 Wigs and hairpieces *expenditures home 2017 Rent                                               | 1218.68<br>(1265.01)  |
| expenditures misc 2017 Electric personal care appliances *expenditures home 2017 Rent                                 | 5065.65<br>(1205.85)  |
| expenditures misc 2017 Dating services *expenditures home 2017 Rent                                                   | 272.58<br>(65.31)     |
| expenditures misc 2017 Gift to non credit union members of stock bond mutual *expenditures home 2017 Rent             | 31227.25<br>(7592.57) |
| <b>Log Hospital Expenditures (2,491)</b>                                                                              |                       |
| <i>Variable Name</i>                                                                                                  | <i>Mean (SD)</i>      |
| expenditures food 2017 Rice *expenditures home 2017 Tenants insurance                                                 | 77.71<br>(17.85)      |
| expenditures food 2017 Lamb organ meats and others *expenditures home 2017 Tenants insurance                          | 44.72 (9.56)          |
| expenditures food 2017 Baby food *expenditures home 2017 Tenants insurance                                            | 101.65<br>(17.90)     |
| expenditures food 2017 Nonalcoholic beer *expenditures home 2017 Tenants insurance                                    | 0.57 (0.19)           |
| expenditures food 2017 Lunch at Vending machine *expenditures home 2017 Tenants insurance                             | 40.87 (7.97)          |
| expenditures food 2017 Dinner at Employer or School Cafeteria *expenditures home 2017 Tenants insurance               | 17.36 (3.32)          |
| expenditures food 2017 Snack nonalcoholic beverages at Restaurants *expenditures home 2017 Tenants insurance          | 155.21<br>(31.16)     |
| expenditures food 2017 Breakfast and brunch at Employer or School cafeteria *expenditures home 2017 Tenants insurance | 39.30 (8.55)          |
| expenditures food 2017 Meals as pay *expenditures home 2017 Tenants insurance                                         | 79.02<br>(19.51)      |
| expenditures food 2017 Other alcoholic beverages away *expenditures home 2017 Tenants insurance                       | 149.14<br>(32.85)     |
| expenditures food 2017 College tuition *expenditures home 2017 Tenants insurance                                      | 2522.43<br>(680.40)   |
| expenditures food 2017 School supplies for college *expenditures home 2017 Tenants insurance                          | 138.44<br>(30.82)     |
| expenditures food 2017 School supplies for vocational and technical schools *expenditures home 2017 Tenants insurance | 1.58 (0.36)           |
| expenditures food 2017 School supplies for day care nursery *expenditures home 2017 Tenants insurance                 | 0.98 (0.20)           |
| expenditures home 2017 Mortgage interest and charges *expenditures home 2017 Tenants insurance                        | 9436.83<br>(1931.24)  |
| expenditures home 2017 Interest paid home equity loan *expenditures home 2017 Tenants insurance                       | 114.44<br>(22.63)     |

|                                                                                                           |                       |
|-----------------------------------------------------------------------------------------------------------|-----------------------|
| expenditures home 2017 Ground rent *expenditures home 2017 Tenants insurance                              | 179.78<br>(41.69)     |
| expenditures home 2017 Rented dwellings *expenditures home 2017 Tenants insurance                         | 10132.20<br>(3671.41) |
| expenditures home 2017 Rent *expenditures home 2017 Tenants insurance                                     | 249.51<br>(95.35)     |
| expenditures home 2017 Main insurance and Other Rented *expenditures home 2017 Tenants insurance          | 310.02<br>(82.30)     |
| expenditures home 2017 Coin operated household laundry dryclean *expenditures home 2017 Tenants insurance | 28.87<br>(10.25)      |
| expenditures home 2017 Computer Installation *expenditures home 2017 Tenants insurance                    | 0.64 (0.17)           |
| expenditures home 2017 Infants equipment *expenditures home 2017 Tenants insurance                        | 89.23<br>(17.09)      |
| expenditures home 2017 Mens sportcoats tailored jackets *expenditures home 2017 Tenants insurance         | 23.81 (7.66)          |
| expenditures home 2017 Boys nightwear *expenditures home 2017 Tenants insurance                           | 3.19 (0.55)           |
| expenditures home 2017 Boys hosiery *expenditures home 2017 Tenants insurance                             | 18.56 (3.27)          |
| expenditures home 2017 Boys accessories *expenditures home 2017 Tenants insurance                         | 20.05 (4.94)          |
| expenditures home 2017 Boys pants and shorts *expenditures home 2017 Tenants insurance                    | 80.00<br>(16.09)      |
| expenditures home 2017 Womens sport coats tailored jackets *expenditures home 2017 Tenants insurance      | 25.58<br>(10.38)      |
| expenditures home 2017 Girls underwear and sleepwear *expenditures home 2017 Tenants insurance            | 29.30 (5.29)          |
| expenditures home 2017 Girls hosiery *expenditures home 2017 Tenants insurance                            | 13.11 (2.72)          |
| expenditures home 2017 Girls uniforms *expenditures home 2017 Tenants insurance                           | 7.65 (1.72)           |
| expenditures home 2017 Infant dresses outerwear *expenditures home 2017 Tenants insurance                 | 79.36<br>(17.44)      |
| expenditures home 2017 Infant nightwear loungewear *expenditures home 2017 Tenants insurance              | 20.39 (3.84)          |
| expenditures home 2017 Boys footwear *expenditures home 2017 Tenants insurance                            | 159.52<br>(37.67)     |
| expenditures home 2017 Girls footwear *expenditures home 2017 Tenants insurance                           | 122.46<br>(26.63)     |
| expenditures misc 2017 Sound equipment accessories *expenditures home 2017 Tenants insurance              | 24.30 (4.94)          |
| expenditures misc 2017 Repair of tv radio and sound equipment *expenditures home 2017 Tenants insurance   | 4.13 (0.88)           |
| expenditures misc 2017 Rental of televisions *expenditures home 2017 Tenants insurance                    | 1.68 (1.70)           |

|                                                                                                                   |                       |
|-------------------------------------------------------------------------------------------------------------------|-----------------------|
| expenditures misc 2017 Extra fees for car trucklease *expenditures home 2017 Tenants insurance                    | 3.81 (1.51)           |
| expenditures misc 2017 Gas tank repair replacement *expenditures home 2017 Tenants insurance                      | 39.04 (8.89)          |
| expenditures misc 2017 Value .surrender. of whole life insurance policy *expenditures home 2017 Tenants insurance | 24054.59<br>(7744.74) |
| expenditures misc 2017 Apparel laundry dryclean not coin.operated *expenditures home 2017 Tenants insurance       | 135.47<br>(41.38)     |
| expenditures misc 2017 Parking fees in home city excluding residence *expenditures home 2017 Tenants insurance    | 124.55<br>(35.21)     |
| expenditures misc 2017 Taxi fares and limousine services on trips *expenditures home 2017 Tenants insurance       | 23.73 (6.99)          |
| expenditures misc 2017 Adult diapers *expenditures home 2017 Tenants insurance                                    | 8.10 (1.59)           |
| expenditures misc 2017 Global positioning system devices *expenditures home 2017 Tenants insurance                | 3.17 (3.31)           |
| expenditures misc 2017 other photographic supplies *expenditures home 2017 Tenants insurance                      | 1.60 (0.57)           |
| expenditures misc 2017 Fireworks *expenditures home 2017 Tenants insurance                                        | 19.27 (5.27)          |
| expenditures misc 2017 Pinball electronic video games *expenditures home 2017 Tenants insurance                   | 5.96 (1.81)           |
| expenditures misc 2017 Wigs and hairpieces *expenditures home 2017 Tenants insurance                              | 7.30 (7.26)           |
| expenditures misc 2017 Dating services *expenditures home 2017 Tenants insurance                                  | 1.66 (0.38)           |
| expenditures misc 2017 Vacation clubs *expenditures home 2017 Tenants insurance                                   | 84.99<br>(38.81)      |
| expenditures misc 2017 Cash Contributions to educational institutions *expenditures home 2017 Tenants insurance   | 115.93<br>(42.21)     |

An \* is placed between 2 features to indicate interaction



Figure A. Top 5% of Predicted Counties from Best Performing Machine Learning Prediction Model for Emergency Room Visits, Inpatient Days, and Hospital Expenditures among U.S. Counties in 2017.

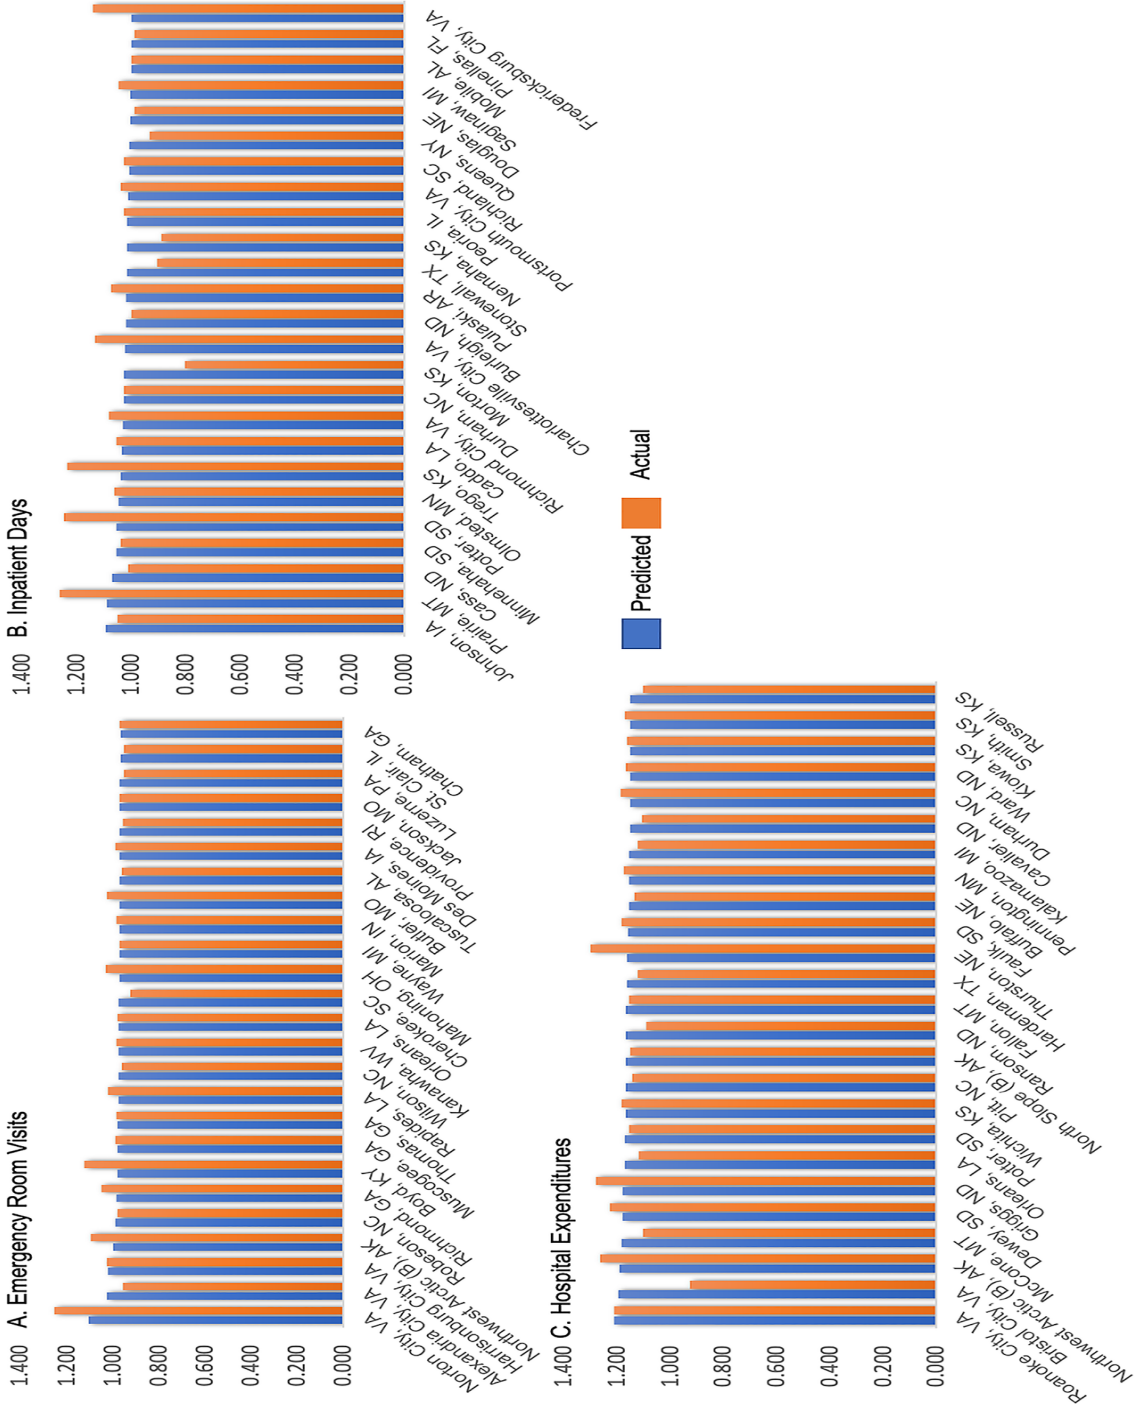

- A. Log Emergency Room visits per capita
- B. Log Inpatient Days per Capita
- C. Log Hospital Expenditures per capita

Appendix G. Variable importance ('model outputs') for best performing machine learning prediction model for log ER visits per capita (Test set: MSE 0.003, R<sup>2</sup> 0.279)

| <b>Variable Name</b>                                                                                         | <b>Variable Importance</b> |
|--------------------------------------------------------------------------------------------------------------|----------------------------|
| census demographics 2017 other Female head household with no husband present                                 | 0.407669151                |
| census demographics 2017 Male head household                                                                 | 0.341058616                |
| census demographics 2017 household No Vehicles                                                               | 0.258742704                |
| census demographics 2017 Female household head                                                               | 0.236075048                |
| census employment 2017 Employee travel time between 30-59 min empl 16 persons                                | 0.235364151                |
| census demographics 2017 population density per square mile                                                  | 0.225819506                |
| census employment 2017 Employed civilian males pop 16 persons                                                | 0.214749995                |
| census housing units 2017 House heating fuel bottled tank or LP gas count housing units                      | 0.213198471                |
| census housing 2017 House renter occupied count housing units                                                | 0.209666632                |
| census employment 2017 Employed in agriculture Forestry Fishing and Hunting pop 16 persons                   | 0.192311087                |
| census demographics 2017 other female household head with no husband present with children less than 18      | 0.191062392                |
| expenditures of misc 2017 Rental of supportive convalescent medical equip                                    | 0.188363825                |
| census demographics 2017 Asian households                                                                    | 0.162098302                |
| census demographics 2017 Asian population alone persons                                                      | 0.158794001                |
| expenditures misc 2017 Care in convalescent or nursing home                                                  | 0.158048354                |
| census employment 2017 Employed in healthcare and social assistance pop 16 persons                           | 0.142497686                |
| census employment 2017 Employed as self employed workers in own another incorporated business pop 16 persons | 0.125613582                |
| census employment 2017 Occupation management business and financial operations pop 16 persons                | 0.11690899                 |
| census employment 2017 Occupation farming fishing and forestry pop 16 persons                                | 0.113730219                |
| health children 2017 dental visit more than 5 years count of households persons                              | 0.103370947                |
| census employment 2017 Employee work at home pop 16 persons                                                  | 0.103289687                |
| census demographics 2017 population rural persons                                                            | 0.101119195                |
| expenditures food 2017 School supplies for day care nursery                                                  | 0.099322044                |
| census demographics 2017 Male Head of family                                                                 | 0.096866267                |
| census demographics 2017 population urban persons                                                            | 0.096003183                |
| census housing 2017 House rent less than 250 count housing units                                             | 0.090579753                |
| census housing 2017 House owner occupied count housing units                                                 | 0.084580296                |
| census housing 2017 House year moved in 2010 or later count housing units                                    | 0.077609943                |
| health adults 2017 Overweight BMI count of households persons                                                | 0.076797243                |
| census employment 2017 Employee travel time between 60-89 min. empl 16 persons                               | 0.076767911                |

|                                                                                                      |             |
|------------------------------------------------------------------------------------------------------|-------------|
| expenditures misc 2017 other photographic supplies                                                   | 0.074580968 |
| health children 2017 Not enrolled in school among school aged population count of households persons | 0.074507416 |
| health children 2017 hay fever count of households persons                                           | 0.070590957 |
| health adults 2017 Healthy BMI count of households persons                                           | 0.069678701 |
| census housing 2017 House owner households wit any mortgage count housing units                      | 0.069243142 |
| census demographics 2017 Two or more Races Head of households                                        | 0.068297749 |
| expenditures home 2017 Ground rent                                                                   | 0.06638319  |
| expenditures home 2017 Computer Installation                                                         | 0.064111537 |
| census demographics 2017 population 5+ Speaking Asian or Pacific Islander Language                   | 0.063045426 |
| health children 2017 3-5 missed school days count of households persons                              | 0.062970339 |
| census demographics 2017 household income 75,000-99,999                                              | 0.060504744 |
| census demographics 2017 American Indian and Alaska Native Head of households                        | 0.059853511 |
| health children 2017 Children 3-17 with ADHD count of households persons                             | 0.059750515 |
| expenditures food 2017 School supplies for vocational and technical schools                          | 0.059417665 |
| expenditures home 2017 Rented dwellings                                                              | 0.058253495 |
| expenditures home 2017 Rent                                                                          | 0.05801939  |
| expenditures home 2017 Rent as pay                                                                   | 0.056607465 |
| health children 2017 Children 2-17years no unmet dental needs count of households persons            | 0.053910624 |
| expenditures home 2017 Tenants insurance                                                             | 0.053472601 |
| expenditures misc 2017 Vacation clubs                                                                | 0.053392024 |
| health adults 2017 Doctor visits 6 months or less count of households persons                        | 0.05331679  |
| health adults 2017 Alcohol current infrequent consumer count of households persons                   | 0.052498754 |
| expenditures home 2017 Infant nightwear loungewear                                                   | 0.051937753 |
| expenditures home 2017 Watch and jewelry repair                                                      | 0.051093674 |
| expenditures food 2017 School supplies for college                                                   | 0.0493621   |
| health adults 2017 Regular healthcare some other place count of households persons                   | 0.048508908 |
| expenditures home 2017 Boys suits sport coats vests                                                  | 0.047465803 |
| expenditures home 2017 Boys hosiery                                                                  | 0.047228813 |
| health children 2017 Delayed care due to cost count of households persons                            | 0.046993716 |
| expenditures misc 2017 Global positioning system devices                                             | 0.046971387 |
| health adults 2017 Obese BMI count of households persons                                             | 0.046066957 |
| expenditures misc 2017 Gas tank repair replacement                                                   | 0.045043114 |
| health children 2017 No missed school days count of households persons                               | 0.044422177 |
| expenditures misc 2017 Repair of tv radio and sound equipment                                        | 0.043704043 |
| expenditures misc 2017 Dating services                                                               | 0.043610776 |
| expenditures misc 2017 Gift to non Credit Union members of stock bond mutual                         | 0.041802763 |
| expenditures food 2017 Nonalcoholic beer                                                             | 0.041219906 |

|                                                                                              |             |
|----------------------------------------------------------------------------------------------|-------------|
| expenditures misc 2017 Fireworks                                                             | 0.040519808 |
| expenditures home 2017 Boys costumes                                                         | 0.039328543 |
| health children 2017 Health status respondent assessed very good count of households persons | 0.038270419 |
| expenditures misc 2017 Termination fee for car trucklease                                    | 0.038250312 |
| expenditures home 2017 Infant coat jacket snowsuit                                           | 0.037603924 |
| expenditures misc 2017 Coin operated apparel laundry dryclean                                | 0.037473156 |
| expenditures misc 2017 Personal services                                                     | 0.037390914 |
| expenditures misc 2017 Wigs and hairpieces                                                   | 0.037137284 |
| expenditures home 2017 Rental of televisions                                                 | 0.036195602 |
| expenditures food 2017 Baby food                                                             | 0.034991127 |
| expenditures home 2017 Boys nightwear                                                        | 0.034179792 |
| expenditures misc 2017 Interest paid home equity loan                                        | 0.03162744  |
| expenditures misc 2017 Playground equip                                                      | 0.030220488 |
| expenditures home 2017 Flatware                                                              | 0.030018882 |
| expenditures home 2017 Boys accessories                                                      | 0.030013783 |
| expenditures home 2017 Infant underwear                                                      | 0.029858278 |
| expenditures food 2017 Dinner at employer or school cafeteria                                | 0.029833939 |
| expenditures misc 2017 Pinball electronic video games                                        | 0.029695913 |
| expenditures misc 2017 Souvenirs                                                             | 0.029520011 |
| expenditures misc 2017 Visual goods                                                          | 0.029188891 |
| expenditures home 2017 Boys footherwear                                                      | 0.029049197 |
| expenditures home 2017 Boys pants and shorts                                                 | 0.028865228 |
| expenditures food 2017 Meals as pay                                                          | 0.028838501 |
| expenditures home 2017 Girls hosiery                                                         | 0.028731204 |
| expenditures misc 2017 Coin operated household laundry dryclean                              | 0.028490959 |
| expenditures food 2017 Sugar                                                                 | 0.027682097 |
| expenditures misc 2017 Checking accounts other bank service charges                          | 0.02761838  |
| expenditures home 2017 Rental of furniture                                                   | 0.026877704 |
| expenditures home 2017 Telephones and accessories                                            | 0.026649667 |
| expenditures misc 2017 Finance late interest charges for student loans                       | 0.025985169 |
| expenditures food 2017 Lamb organ meats and others                                           | 0.024814683 |
| expenditures food 2017 Rice                                                                  | 0.024208605 |
| expenditures misc 2017 Intracity mass transit fares                                          | 0.023136845 |
| expenditures misc 2017 Towing charges                                                        | 0.021659495 |
| expenditures misc 2017 Video game software                                                   | 0.021346333 |

Appendix H. Relative influence (‘model outputs’) for best performing machine learning prediction model for log inpatient days per capita (Test set: MSE 0.009, R<sup>2</sup> 0.267)

| <b>Variable name</b>                                                                                  | <b>Relative Influence</b> |
|-------------------------------------------------------------------------------------------------------|---------------------------|
| census employment 2017 Employed in healthcare and social assistance pop 16 persons                    | 18.3438457                |
| census demographics 2017 household Income Median                                                      | 14.7410182                |
| expenditures home 2017 Rent                                                                           | 8.0915424                 |
| census demographics 2017 Female household head                                                        | 6.278138                  |
| census demographics 2017 White Non-Hispanic household                                                 | 4.0457959                 |
| census housing units 2017 House structure with 50 units count housing units                           | 3.9181835                 |
| census demographics 2017 Non family female head of household                                          | 3.87898                   |
| census demographics 2017 other female head household no husband present with no children less than 18 | 3.5994429                 |
| census employment 2017 Employee travel time between 60-89 min. empl 16 persons                        | 3.2672725                 |
| expenditures misc 2017 Coin operated apparel laundry dryclean                                         | 3.0649698                 |
| expenditures misc 2017 Intracity mass transit fares                                                   | 2.9511729                 |
| census employment 2017 Employed in agriculture, forestry, fishing and hunting pop 16 persons          | 2.8192517                 |
| census demographics 2017 Female head of Fam                                                           | 2.441348                  |
| census demographics 2017 population 25+ with professional degree                                      | 2.4303614                 |
| census housing units 2017 House owner household valued 25,000-29,999 count housing units              | 2.2064714                 |
| expenditures misc 2017 Gas tank repair or replacement                                                 | 2.1581848                 |
| census employment 2017 Employee travel time between 30-59 min. empl 16 persons                        | 1.9667907                 |
| census housing units 2017 House structure with 5-9 units count housing units                          | 1.4598712                 |
| census housing units 2017 household with 4+ vehicles count housing units                              | 1.4432175                 |
| health adults 2017 Overweight BMI count of households persons                                         | 1.3629276                 |
| census housing units 2017 House heating fuel bottled tank or LP gas count housing units               | 1.2688923                 |
| health children 2017 3-5 missed school days count of households persons                               | 1.0503803                 |
| health children 2017 Not enrolled in school among school aged population count of households persons  | 1.0475996                 |
| health children 2017 Children2-17years dental visit more than 5 years count of households persons     | 0.7093975                 |
| expenditures food 2017 School supplies for vocational and technical schools                           | 0.6503734                 |
| census demographics 2017 households 1 Vehicle                                                         | 0.5844223                 |
| health children 2017 Doctor visits more than 2 years less than 5 years count of households persons    | 0.5643008                 |
| expenditures home 2017 Girls underwear and sleepwear                                                  | 0.5594537                 |
| census demographics 2017 Two or more Races Head of households                                         | 0.5594537                 |

|                                                                |           |
|----------------------------------------------------------------|-----------|
| expenditures misc 2017 Sewing machines                         | 0.4926511 |
| expenditures misc 2017 Wigs and hairpieces                     | 0.4477749 |
| census housing units 2017 House Rent 2000+ count housing units | 0.4276178 |
| expenditures food 2017 Nonalcoholic beer                       | 0.4276178 |
| expenditures misc 2017 Rental of medical equip                 | 0.3968204 |
| expenditures home 2017Boys nightwear                           | 0.3950608 |

\* Only variables with non-zero relative influence are included

Appendix I. Variable importance ('model outputs') for best performing machine learning prediction model for log hospital expenditures per capita (Test set MSE 0.003, R<sup>2</sup> 0.447)

| <b>Variable</b>                                                                                    | <b>Variable Importance</b> |
|----------------------------------------------------------------------------------------------------|----------------------------|
| census employment 2017 Employee Travel Time 30 between 59 min. empl 16 persons                     | 0.82150455                 |
| census employment 2017 Employed in healthcare and Social Assistance empl 16 persons                | 0.65523231                 |
| census employment 2017 Employee walked to work empl 16 persons                                     | 0.40309645                 |
| census demographics 2017 Non families aged under 25 years households                               | 0.37325685                 |
| census employment 2017 Employee travel time less than 15 min.empl 16 persons                       | 0.36979848                 |
| census demographics 2017 Median income per capita                                                  | 0.33549655                 |
| census demographics 2017 White population alone persons                                            | 0.3016138                  |
| expenditures food 2017 Dinner at employer or school cafeteria                                      | 0.26379745                 |
| census employment 2017 Employed in private not for profit wage and salary workers empl 16 persons  | 0.25479591                 |
| census demographics 2017 population 25+ with professional degree                                   | 0.21234366                 |
| census demographics 2017 White Non-Hispanic households                                             | 0.20854437                 |
| health children 2017 Children 2-17years dental visit more than 5 years count of households persons | 0.19966901                 |
| expenditures home 2017 Tenants insurance                                                           | 0.19620218                 |
| census demographics 2017 population density per square mile                                        | 0.18956363                 |
| census housing units 2017 House built between 1990-1999 count housing units                        | 0.1654846                  |
| census demographics 2017 Non families aged 25-34 years households                                  | 0.16079443                 |
| census housing units 2017 Housing structure with 50 units count housing units                      | 0.15219448                 |
| census housing units 2017 House renter occupied count housing units                                | 0.14277415                 |
| census demographics 2017 household No Vehicles                                                     | 0.13636079                 |
| expenditures food 2017 Breakfast and brunch at employer or school cafeteria                        | 0.13053485                 |
| census employment 2017 Employed in accommodation and food services empl 16 persons                 | 0.12924738                 |
| expenditures home 2017 Rented dwellings                                                            | 0.12909878                 |
| expenditures home 2017 Rent                                                                        | 0.11903522                 |
| census demographics 2017 population Living in Non-Institutional Group Quarters                     | 0.11808155                 |
| census housing units 2017 House median year built count year                                       | 0.1094216                  |
| census housing units 2017 House owner occupied count housing units                                 | 0.10386566                 |
| census housing units 2017 House owner households with any mortgage count housing units             | 0.10041333                 |
| census demographics 2017 households 4+ Vehicles                                                    | 0.09980707                 |
| expenditures food 2017 Meals as pay                                                                | 0.09815594                 |
| census housing units 2017 House year moved in between 2000-2009 count housing units                | 0.0969702                  |
| census employment 2017 Employed in private for profit wage and salary workers empl 16 persons      | 0.0955506                  |
| health adult 2017 Overweight BMI count of households persons                                       | 0.09495769                 |

|                                                                                                   |            |
|---------------------------------------------------------------------------------------------------|------------|
| census employment 2017 Employed in white collar                                                   | 0.09083353 |
| expenditures home 2017 Rent as pay                                                                | 0.0879176  |
| health children 2017 respiratory allergies count of households persons                            | 0.08753535 |
| health adult 2017 Cervical cancer count of households persons                                     | 0.08599195 |
| expenditures food 2017 School supplies for college                                                | 0.08547209 |
| expenditures food 2017 School supplies for day care nursery                                       | 0.08421733 |
| census demographics 2017 Asian population alone persons                                           | 0.08106055 |
| census demographics 2017 population rural persons                                                 | 0.08019181 |
| health children 2017 with prescribed medication for 3 months count of households persons          | 0.07833704 |
| census demographics 2017 Asian households                                                         | 0.07255549 |
| expenditures misc 2017 Computer Installation                                                      | 0.07204103 |
| expenditures misc 2017 Coin operated apparel laundry dryclean                                     | 0.07175207 |
| census demographics 2017 population urban persons                                                 | 0.07132792 |
| health children 2017 Doctor visits more than 5 years count of households persons                  | 0.07115858 |
| expenditures food 2017 Lunch at Vending machine                                                   | 0.07100503 |
| expenditures food 2017 School supplies for vocational and technical schools                       | 0.07056304 |
| health children 2017 Doctor visit more than 6 months less than 1 year count of households persons | 0.06999761 |
| health adult 2017 Aerobic exercise insufficiently active                                          | 0.06954969 |
| health adult 2017 Obese BMI count of households persons                                           | 0.06886809 |
| health adult 2017 Alcohol current infrequent user                                                 | 0.06521236 |
| health adult 2017 Breast cancer count of households persons                                       | 0.06171417 |
| expenditures home 2017 Rental of furniture                                                        | 0.05929783 |
| census demographics 2017 Black households                                                         | 0.05787219 |
| expenditures misc 2017 other photographic supplies                                                | 0.05752996 |
| health adult 2017 Healthy BMI count of households persons                                         | 0.05748918 |
| health children 2017 Health status respondent assessed very good count of households persons      | 0.05659049 |
| expenditures misc 2017 Dating services                                                            | 0.0561638  |
| expenditures home 2017 Infant nightwear loungewear                                                | 0.0559804  |
| expenditures misc 2017 Coin.operated household laundry dryclean                                   | 0.0559133  |
| expenditures food 2017 Snack nonalcoholic beverages at Restaurant                                 | 0.05507692 |
| expenditures misc 2017 Termination fee for car trucklease                                         | 0.05489505 |
| health children 2017 11+ missed school days count of households persons                           | 0.05426642 |
| expenditures misc 2017 Gift to non credit union members of stock bond mutual                      | 0.05394819 |
| expenditures home 2017 Infants equipment                                                          | 0.05333773 |
| expenditures misc 2017 Day care centers nursery and preschools                                    | 0.05296786 |
| expenditures misc 2017 Main insurance and Other expenses Rented                                   | 0.05268474 |
| expenditures food 2017 Nonalcoholic beer                                                          | 0.0511552  |
| expenditures misc 2017 Rental of supportive convalescent medical equipment                        | 0.05081056 |



|                                                                      |            |
|----------------------------------------------------------------------|------------|
| expenditures misc 2017 Repair of tv radio and sound equipment        | 0.05026984 |
| expenditures misc 2017 Rental of televisions                         | 0.05007451 |
| health adult 2017 Underweight BMI count of households persons        | 0.04943173 |
| expenditures home 2017 Infant coat jacket snowsuit                   | 0.04939549 |
| expenditures misc 2017 Video game software                           | 0.04808385 |
| expenditures food 2017 Lamb organ meats and others                   | 0.04715627 |
| expenditures food 2017 Baby food                                     | 0.04626239 |
| expenditures food 2017 Medical equipment for general use             | 0.04604314 |
| expenditures home 2017 Telephones and accessories                    | 0.04572196 |
| expenditures home 2017 Boys hosiery                                  | 0.04522888 |
| expenditures misc 2017 Wigs and hairpieces                           | 0.04507369 |
| expenditures misc 2017 Global positioning system devices             | 0.04366803 |
| expenditures misc 2017 Pinball electronic video games                | 0.04336407 |
| expenditures misc 2017 Watch and jewelry repair                      | 0.04225349 |
| expenditures misc 2017 Boys nightwear                                | 0.0420863  |
| expenditures misc 2017 Rental of medical equipment                   | 0.04137262 |
| expenditures misc 2017 Vacation clubs                                | 0.04098154 |
| expenditures misc 2017 Interest paid home equity loan                | 0.04062316 |
| expenditures misc 2017 Mortgage interest                             | 0.04036718 |
| expenditures misc 2017 Cash contribution to educational institutions | 0.04008163 |
| expenditures misc 2017 Fireworks                                     | 0.0399075  |
| expenditures misc 2017 Towing charges                                | 0.03941961 |
| expenditures home 2017 Girls uniforms                                | 0.03881726 |
| expenditures home 2017 Boys footwear                                 | 0.03860485 |
| expenditures misc 2017 Watches                                       | 0.03686927 |
| expenditures home 2017 Girls hosiery                                 | 0.03551689 |
| expenditures home 2017 Girls underwear and sleepwear                 | 0.03296941 |
| expenditures home 2017 Boys 2 15 clothing                            | 0.03242311 |
| expenditures home 2017 Boys coats and jackets                        | 0.03213292 |
| expenditures home 2017 Girls coats and jackets                       | 0.03208482 |
| expenditures misc 2017 Mortgage interest and charges                 | 0.03092974 |
| expenditures home 2017 Girls skirt pant short                        | 0.02910507 |

Appendix J. Median and IQR values for per capita ER Visits, IP Days, and Hospital Expenditures in 2017, 2018, and 2019

|                                     |               | <b>2017</b>     | <b>2018</b>     | <b>2019</b>     |
|-------------------------------------|---------------|-----------------|-----------------|-----------------|
| <b><i>ER Visits</i></b>             | <i>N</i>      | 2475            | 2483            | 2476            |
|                                     | <i>Median</i> | 0.45            | 0.443           | 0.443           |
|                                     | <i>IQR</i>    | 0.318,<br>0.618 | 0.312,<br>0.615 | 0.305,<br>0.443 |
|                                     |               |                 |                 |                 |
| <b><i>Inpatient Days</i></b>        | <i>N</i>      | 2491            | 2505            | 2498            |
|                                     | <i>Median</i> | 0.368           | 0.36            | 0.361           |
|                                     | <i>IQR</i>    | 0.176,<br>0.826 | 0.170,<br>0.818 | 0.169,<br>0.807 |
|                                     |               |                 |                 |                 |
| <b><i>Hospital Expenditures</i></b> | <i>N</i>      | 2491            | 2505            | 2498            |
|                                     | <i>Median</i> | 2.10            | 2.17            | 2.26            |
|                                     | <i>IQR</i>    | 1.29, 3.62      | 1.33,<br>3.49   | 1.36,<br>3.63   |

ER visits, inpatient days, and hospital expenditures were re-calculated in 2018 and 2019, using the same data source and definitions used in the original study. The impetus of this small sensitivity analysis was to examine the stability of the cross-sectional estimates over this 3-year time-period.

## Appendix K. Histograms of ER visits, Inpatient Days, and Hospital Expenditures in 2017, 2018, and 2019

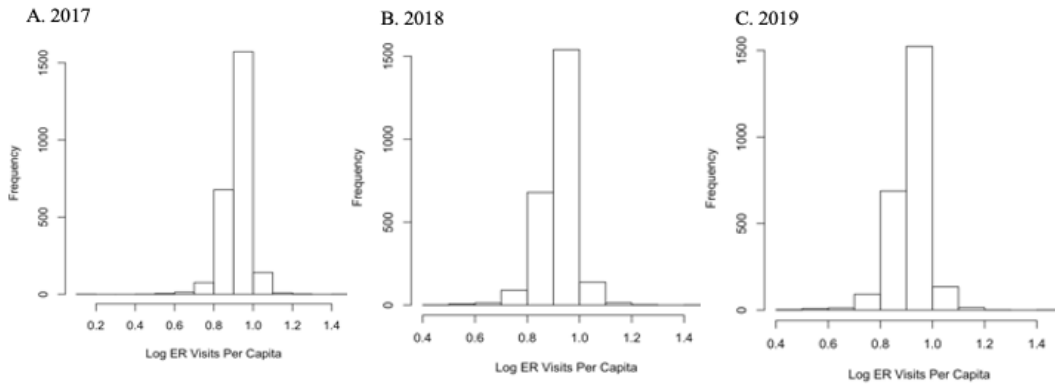

N1. Histogram of Log ER Visits Per Capita for 2017 (A), 2018 (B), and 2019 (C). The same outcome definitions and data sources were used to generate across the presented time-periods.

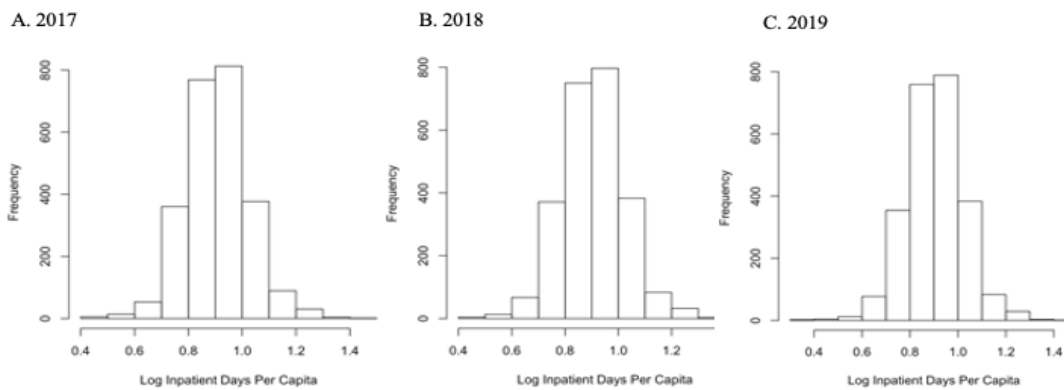

N 2. Histogram of Log Inpatient Days Per Capita in 2017 (A), 2018 (B), and 2019 (C). The same outcome definitions and data sources were used to generate across the presented time-periods)

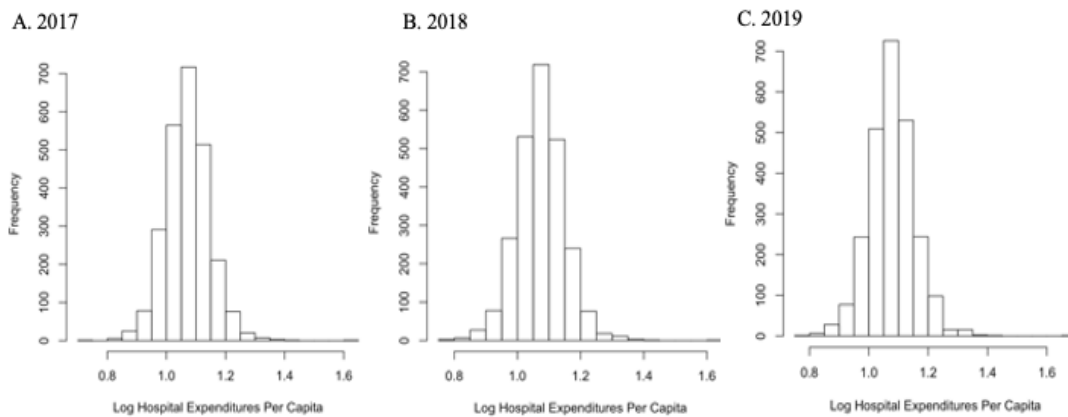

N 3. Histogram of Log Hospital Expenditures Per Capita in 2017 (A), 2018 (B), and 2019 (C). The same outcome definitions and data sources were used to generate across the presented time-periods)

Appendix L. Per capita trends in ER Visits (A), Inpatient Days (B) and Hospital Expenditures (C) overtime (2017-2019) for top 10 counties based on 2017 Utilization Values

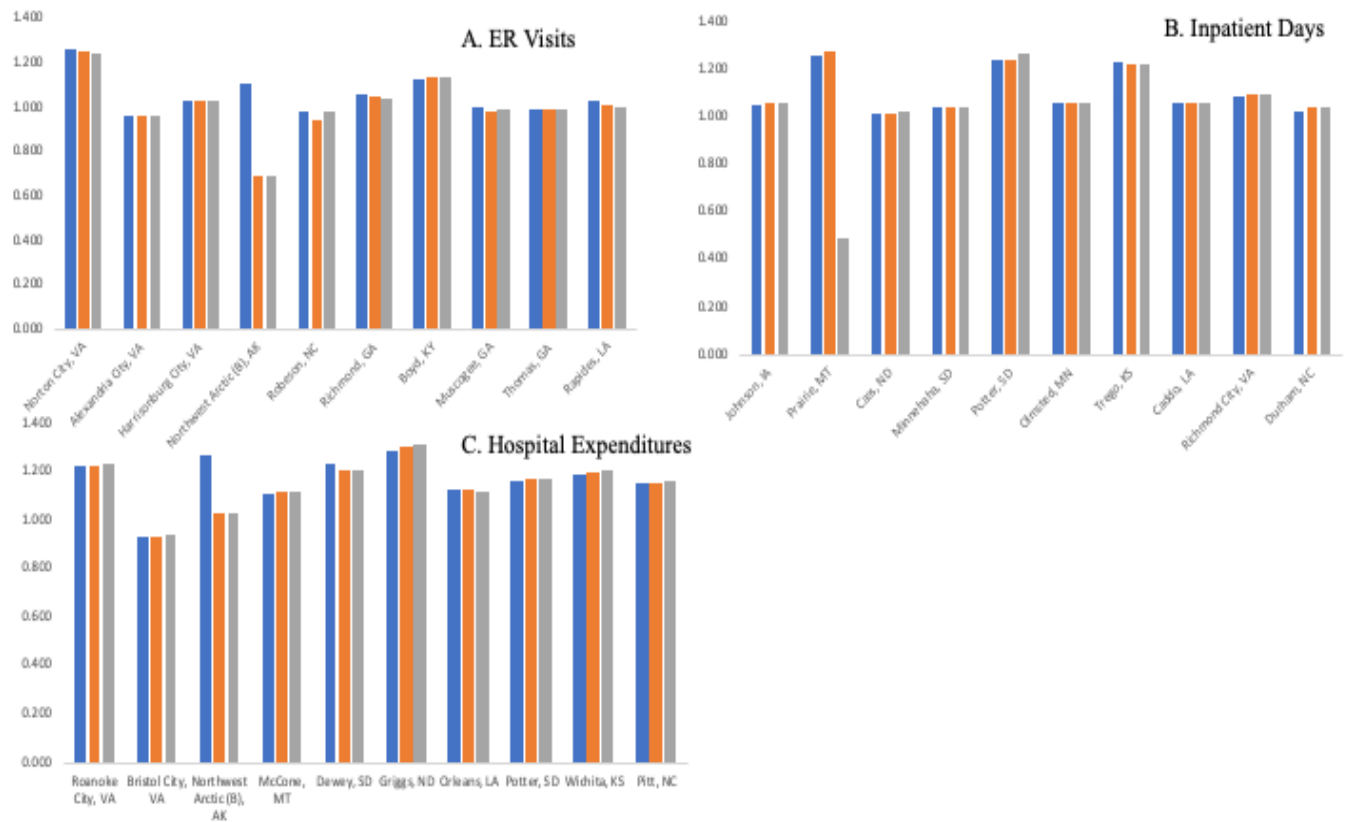

O. Top 10 counties based on 2017 ER visits (A), inpatient days (B), and hospital expenditures (C), including corresponding utilization for 2018 and 2019. ER visits, inpatient days, and hospital expenditures calculated as log per capita values for 2017, 2018, and 2019.

## References

1. Lundberg SM, Lee, SI. A Unified Approach to Interpreting Model Predictions. *31st Conference on Neural Information Processing Systems 2017*.
2. Molnar C. *Interpretable machine learning. A Guide for making black box models explainable*. 2019.
3. Lundberg SM, Erion, G., Chen, H., DeGrave, A., Prutkin, J.M., Nair, B., Katz, R., Himmelfarb, J., Bansal, N., Lee, SI. From Local Explanations to Global Understanding with Explainable AI for Trees. *Nature Machine Intelligence*. 2020;2:56-67.
